# Supplementary material
Source: publisher figshare collection journal article supplement (https://gsajournals.figshare.com/ndownloader/files/21767274)
Supplement: Supplementary file 1 [file 21767274]

## Sheet: imipridone_RANKS_scores
Gene	ONC201 10uM RANKS scores	ONC201 10uM FDR	ONC212 0.15uM RANKS scores	ONC212 0.15uM FDR	entrez gene ID	official symbol	uniprot summary	Aliases and previous symbols	official name
NDC80	-4.08	0.019	-1.47	1	10403	NDC80	Acts as a component of the essential kinetochore- associated NDC80 complex, which is required for chromosome segregation and spindle checkpoint activity (PubMed:9315664, PubMed:12351790, PubMed:14654001, PubMed:14699129, PubMed:15062103, PubMed:15235793, PubMed:15239953, PubMed:15548592, PubMed:16732327). Required for kinetochore integrity and the organization of stable microtubule binding sites …	HEC;HEC1;hsNDC80;TID3;KNTC2	NDC80, kinetochore complex component
SEPHS2	-3.22	0.019	-2.59	0.158	22928	SEPHS2	Synthesizes selenophosphate from selenide and ATP.	SPS2;SPS2b	selenophosphate synthetase 2
CDCA8	-2.94	0.313	-3.83	0.0095	55143	CDCA8	Component of the chromosomal passenger complex (CPC), a complex that acts as a key regulator of mitosis. The CPC complex has essential functions at the centromere in ensuring correct chromosome alignment and segregation and is required for chromatin-induced microtubule stabilization and spindle assembly. Major effector of the TTK kinase in the control of attachment- error-correction and chromosom…	FLJ12042;MESRGP;BOR;DasraB	cell division cycle associated 8
ATP6V0B	-2.8	0.774	-0.49	1	533	ATP6V0B	Proton-conducting pore forming subunit of the membrane integral V0 complex of vacuolar ATPase. V-ATPase is responsible for acidifying a variety of intracellular compartments in eukaryotic cells.	VMA16;HATPL;ATP6F	ATPase H+ transporting V0 subunit b
BCOR	-2.59	0.158	-1.68	1	54880	BCOR	Transcriptional corepressor. May specifically inhibit gene expression when recruited to promoter regions by sequence- specific DNA-binding proteins such as BCL6 and MLLT3. This repression may be mediated at least in part by histone deacetylase activities which can associate with this corepressor. Involved in the repression of TFAP2A; impairs binding of BCL6 and KDM2B to TFAP2A promoter regions. V…	FLJ20285;KIAA1575	BCL6 corepressor
CTR9	-2.39	0.392	-1.45	1	9646	CTR9	Component of the PAF1 complex (PAF1C) which has multiple functions during transcription by RNA polymerase II and is implicated in regulation of development and maintenance of embryonic stem cell pluripotency. PAF1C associates with RNA polymerase II through interaction with POLR2A CTD non- phosphorylated and 'Ser-2'- and 'Ser-5'-phosphorylated forms and is involved in transcriptional elongation, a…	KIAA0155;TSBP;p150TSP;SH2BP1	CTR9 homolog, Paf1/RNA polymerase II complex component
NPIPB8	-2.39	1	0.22	1	728734	NPIPB8	NA	NA	nuclear pore complex interacting protein family member B8
MDM2	-2.38	0.751	-2.83	0.276	4193	MDM2	E3 ubiquitin-protein ligase that mediates ubiquitination of p53/TP53, leading to its degradation by the proteasome. Inhibits p53/TP53- and p73/TP73-mediated cell cycle arrest and apoptosis by binding its transcriptional activation domain. Also acts as a ubiquitin ligase E3 toward itself and ARRB1. Permits the nuclear export of p53/TP53. Promotes proteasome-dependent ubiquitin-independent degradat…	HDM2;MGC5370	MDM2 proto-oncogene
OTUB1	-2.38	0.392	-2.09	0.587	55611	OTUB1	Hydrolase that can specifically remove 'Lys-48'-linked conjugated ubiquitin from proteins and plays an important regulatory role at the level of protein turnover by preventing degradation. Regulator of T-cell anergy, a phenomenon that occurs when T-cells are rendered unresponsive to antigen rechallenge and no longer respond to their cognate antigen. Acts via its interaction with RNF128/GRAIL, a c…	FLJ20113;FLJ40710	OTU deubiquitinase, ubiquitin aldehyde binding 1
CHD8	-2.35	0.313	-2.03	0.459	57680	CHD8	DNA helicase that acts as a chromatin remodeling factor and regulates transcription. Acts as a transcription repressor by remodeling chromatin structure and recruiting histone H1 to target genes. Suppresses p53/TP53-mediated apoptosis by recruiting histone H1 and preventing p53/TP53 transactivation activity. Acts as a negative regulator of Wnt signaling pathway by regulating beta-catenin (CTNNB1)…	KIAA1564;DUPLIN;HELSNF1	chromodomain helicase DNA binding protein 8
HIST1H2AI	-2.35	0.313	-0.03	1	8329	HIST1H2AI	Core component of nucleosome. Nucleosomes wrap and compact DNA into chromatin, limiting DNA accessibility to the cellular machineries which require DNA as a template. Histones thereby play a central role in transcription regulation, DNA repair, DNA replication and chromosomal stability. DNA accessibility is regulated via a complex set of post-translational modifications of histones, also called h…	H2A/c;H2AFC	histone cluster 1 H2A family member i
STK25	-2.31	0.462	0.69	1	10494	STK25	Oxidant stress-activated serine/threonine kinase that may play a role in the response to environmental stress. Targets to the Golgi apparatus where it appears to regulate protein transport events, cell adhesion, and polarity complexes important for cell migration. {ECO:0000269|PubMed:15037601}.	SOK1;YSK1	serine/threonine kinase 25
SMNDC1	-2.29	0.462	-1.08	1	10285	SMNDC1	Necessary for spliceosome assembly. Overexpression causes apoptosis. {ECO:0000269|PubMed:11331295, ECO:0000269|PubMed:11331595, ECO:0000269|PubMed:9817934}.	SPF30;SMNR;TDRD16C	survival motor neuron domain containing 1
CPEB2	-2.28	0.81	-1.14	1	132864	CPEB2	May play a role in translational regulation of stored mRNAs in transcriptionally inactive haploid spermatids. Binds to poly(U) RNA oligomers (By similarity). Required for cell cycle progression, specifically for the transition from metaphase to anaphase (PubMed:26398195). {ECO:0000250|UniProtKB:Q812E0, ECO:0000269|PubMed:26398195}.	NA	cytoplasmic polyadenylation element binding protein 2
SNW1	-2.28	0.392	-0.41	1	22938	SNW1	Involved in transcriptional regulation. Modulates TGF- beta-mediated transcription via association with SMAD proteins, MYOD1-mediated transcription via association with PABPN1, RB1- mediated transcriptional repression, and retinoid-X receptor (RXR)- and vitamin D receptor (VDR)-dependent gene transcription in a cell line-specific manner probably involving coactivators NCOA1 and GRIP1. Is involved…	NCoA-62;SKIP;Prp45;PRPF45;Bx42;SKIP1;FUN20;SKIIP	SNW domain containing 1
ESPL1	-2.26	1	-3.59	0.408	9700	ESPL1	Caspase-like protease, which plays a central role in the chromosome segregation by cleaving the SCC1/RAD21 subunit of the cohesin complex at the onset of anaphase. During most of the cell cycle, it is inactivated by different mechanisms. {ECO:0000269|PubMed:10411507, ECO:0000269|PubMed:11509732}.	KIAA0165;ESP1;SEPA	extra spindle pole bodies like 1, separase
MTRNR2L3	-2.26	1	-1.16	1	100462983	MTRNR2L3	Plays a role as a neuroprotective and antiapoptotic factor. {ECO:0000250|UniProtKB:Q8IVG9}.	NA	MT-RNR2 like 3
ASH2L	-2.24	0.751	-1.4	1	9070	ASH2L	Component of the Set1/Ash2 histone methyltransferase (HMT) complex, a complex that specifically methylates 'Lys-4' of histone H3, but not if the neighboring 'Lys-9' residue is already methylated. As part of the MLL1/MLL complex it is involved in methylation and dimethylation at 'Lys-4' of histone H3. May function as a transcriptional regulator. May play a role in hematopoiesis. {ECO:0000269|PubMe…	ASH2L2;ASH2;Bre2;ASH2L1	ASH2 like, histone lysine methyltransferase complex subunit
CDC5L	-2.22	0.832	-1.33	1	988	CDC5L	DNA-binding protein involved in cell cycle control. May act as a transcription activator. Component of the PRP19-CDC5L complex that forms an integral part of the spliceosome and is required for activating pre-mRNA splicing. The PRP19-CDC5L complex may also play a role in the response to DNA damage (DDR). {ECO:0000269|PubMed:10570151, ECO:0000269|PubMed:11082045, ECO:0000269|PubMed:11101529, ECO:0…	PCDC5RP;hCDC5;CEF1;CDC5	cell division cycle 5 like
CHMP2A	-2.19	0.861	-2.35	0.629	27243	CHMP2A	Probable core component of the endosomal sorting required for transport complex III (ESCRT-III) which is involved in multivesicular bodies (MVBs) formation and sorting of endosomal cargo proteins into MVBs. MVBs contain intraluminal vesicles (ILVs) that are generated by invagination and scission from the limiting membrane of the endosome and mostly are delivered to lysosomes enabling degradation …	BC-2;CHMP2;VPS2;VPS2A	charged multivesicular body protein 2A
PCYT1A	-2.19	0.462	-2.1	0.422	5130	PCYT1A	Controls phosphatidylcholine synthesis.	CT;CTPCT;PCYT1	phosphate cytidylyltransferase 1, choline, alpha
TK1	-2.19	0.774	-1.4	1	7083	TK1	NA	NA	thymidine kinase 1
ISCU	-2.19	1	-1.2	1	23479	ISCU	Scaffold protein for the de novo synthesis of iron- sulfur (Fe-S) clusters within mitochondria, which is required for maturation of both mitochondrial and cytoplasmic [2Fe-2S] and [4Fe-4S] proteins (PubMed:11060020). First, a [2Fe-2S] cluster is transiently assembled on the scaffold protein ISCU. In a second step, the cluster is released from ISCU, transferred to a glutaredoxin GLRX5, followed by…	ISU2;hnifU;IscU;NIFUN	iron-sulfur cluster assembly enzyme
MYLIP	-2.18	0.608	-0.91	1	29116	MYLIP	E3 ubiquitin-protein ligase that mediates ubiquitination and subsequent proteasomal degradation of myosin regulatory light chain (MRLC), LDLR, VLDLR and LRP8. Activity depends on E2 enzymes of the UBE2D family. Proteasomal degradation of MRLC leads to inhibit neurite outgrowth in presence of NGF by counteracting the stabilization of MRLC by saposin-like protein (CNPY2/MSAP) and reducing CNPY2-sti…	MIR;IDOL	myosin regulatory light chain interacting protein
C17orf70	-2.15	0.462	-0.25	1	80233	FAAP100	Plays a role in Fanconi anemia-associated DNA damage response network. Regulates FANCD2 monoubiquitination and the stability of the FA core complex. Induces chromosomal instability as well as hypersensitivity to DNA cross-linking agents, when repressed. {ECO:0000269|PubMed:17396147}.	FLJ22175;C17orf70	FA core complex associated protein 100
WDR33	-2.15	1	-0.07	1	55339	WDR33	Essential for both cleavage and polyadenylation of pre- mRNA 3' ends. {ECO:0000269|PubMed:19217410}.	FLJ11294;WDC146;NET14	WD repeat domain 33
FAM96B	-2.12	1	-2.47	0.717	51647	CIAO2B	Component of the cytosolic iron-sulfur protein assembly (CIA) complex, a multiprotein complex that mediates the incorporation of iron-sulfur cluster into extramitochondrial Fe/S proteins. As part of the mitotic spindle-associated MMXD complex it plays a role in chromosome segregation, probably by facilitating iron-sulfur cluster assembly into ERCC2/XPD. {ECO:0000269|PubMed:20797633}.	CGI-128;MIP18;CIA2B;FAM96B	cytosolic iron-sulfur assembly component 2B
GPX4	-2.12	0.506	-2.34	0.276	2879	GPX4	Essential antioxidant peroxidase that directly reduces phospholipid hydroperoxide even if they are incorporated in membranes and lipoproteins (By similarity). Can also reduce fatty acid hydroperoxide, cholesterol hydroperoxide and thymine hydroperoxide (By similarity). Plays a key role in protecting cells from oxidative damage by preventing membrane lipid peroxidation (By similarity). Required to…	PHGPx;MCSP	glutathione peroxidase 4
CYP4B1	-2.12	0.749	-1.18	1	1580	CYP4B1	Cytochromes P450 are a group of heme-thiolate monooxygenases. In liver microsomes, this enzyme is involved in an NADPH-dependent electron transport pathway. It oxidizes a variety of structurally unrelated compounds, including steroids, fatty acids, and xenobiotics.	NA	cytochrome P450 family 4 subfamily B member 1
RPS3A	-2.11	0.81	-0.47	1	6189	RPS3A	May play a role during erythropoiesis through regulation of transcription factor DDIT3. {ECO:0000255|HAMAP-Rule:MF 03122}.	S3A;MFTL	ribosomal protein S3A
DUPD1	-2.1	0.751	0.11	1	338599	DUPD1	Dual specificity phosphatase able to dephosphorylate phosphotyrosine, phosphoserine and phosphothreonine residues, with a preference for phosphotyrosine as a substrate. {ECO:0000269|PubMed:17498703}.	DUSP27	dual specificity phosphatase and pro isomerase domain containing 1
CTNNBL1	-2.08	0.599	-0.36	1	56259	CTNNBL1	Component of the PRP19-CDC5L complex that forms an integral part of the spliceosome and is required for activating pre-mRNA splicing. Participates in AID/AICDA-mediated Ig class switching recombination (CSR). May induce apoptosis.	FLJ21108;P14L;P14;NAP;NYD-SP19;C20orf33	catenin beta like 1
SETD1B	-2.07	0.751	-0.96	1	23067	SETD1B	Histone methyltransferase that specifically methylates 'Lys-4' of histone H3, when part of the SET1 histone methyltransferase (HMT) complex, but not if the neighboring 'Lys- 9' residue is already methylated. H3 'Lys-4' methylation represents a specific tag for epigenetic transcriptional activation. The non-overlapping localization with SETD1A suggests that SETD1A and SETD1B make non-redundant con…	KIAA1076;Set1B;KMT2G	SET domain containing 1B
POLR2L	-2.07	1	1.43	1	5441	POLR2L	DNA-dependent RNA polymerase catalyzes the transcription of DNA into RNA using the four ribonucleoside triphosphates as substrates. Common component of RNA polymerases I, II and III which synthesize ribosomal RNA precursors, mRNA precursors and many functional non-coding RNAs, and a small RNAs, such as 5S rRNA and tRNAs, respectively. Pol II is the central component of the basal RNA polymerase II…	RPB10beta;RBP10;RPABC5;RPB7.6;hRPB7.6;hsRPB10b	RNA polymerase II subunit L
CRISPLD1	-2.06	0.761	-1.48	1	83690	CRISPLD1	NA	Cocoacrisp;DKFZp762F133;LCRISP1	cysteine rich secretory protein LCCL domain containing 1
PFN1	-2.06	0.608	-1.14	1	5216	PFN1	Binds to actin and affects the structure of the cytoskeleton. At high concentrations, profilin prevents the polymerization of actin, whereas it enhances it at low concentrations. By binding to PIP2, it inhibits the formation of IP3 and DG. Inhibits androgen receptor (AR) and HTT aggregation and binding of G-actin is essential for its inhibition of AR. {ECO:0000269|PubMed:18573880}.	NA	profilin 1
POLE2	-2.05	1	-0.47	1	5427	POLE2	Participates in DNA repair and in chromosomal DNA replication.	DPE2	DNA polymerase epsilon 2, accessory subunit
RXFP2	-2.04	0.774	-0.11	1	122042	RXFP2	Receptor for relaxin. The activity of this receptor is mediated by G proteins leading to stimulation of adenylate cyclase and an increase of cAMP. May also be a receptor for Leydig insulin-like peptide (INSL3).	GREAT;GPR106;INSL3R;RXFPR2;LGR8	relaxin family peptide receptor 2
VMO1	-2.02	0.702	-0.45	1	284013	VMO1	NA	NA	vitelline membrane outer layer 1 homolog
HIST1H2AJ	-2.02	0.774	-0.21	1	8331	HIST1H2AJ	Core component of nucleosome. Nucleosomes wrap and compact DNA into chromatin, limiting DNA accessibility to the cellular machineries which require DNA as a template. Histones thereby play a central role in transcription regulation, DNA repair, DNA replication and chromosomal stability. DNA accessibility is regulated via a complex set of post-translational modifications of histones, also called h…	H2A/E;H2AFE	histone cluster 1 H2A family member j
STX8	-2.01	0.937	-0.19	1	9482	STX8	Vesicle trafficking protein that functions in the early secretory pathway, possibly by mediating retrograde transport from cis-Golgi membranes to the ER.	CARB	syntaxin 8
PRC1	-2	0.937	1	1	9055	PRC1	Key regulator of cytokinesis that cross-links antiparrallel microtubules at an average distance of 35 nM. Essential for controlling the spatiotemporal formation of the midzone and successful cytokinesis. Required for KIF14 localization to the central spindle and midbody. Required to recruit PLK1 to the spindle. Stimulates PLK1 phosphorylation of RACGAP1 to allow recruitment of ECT2 to the central…	ASE1	protein regulator of cytokinesis 1
NELFA	-1.99	0.81	-0.49	1	7469	NELFA	Essential component of the NELF complex, a complex that negatively regulates the elongation of transcription by RNA polymerase II. The NELF complex, which acts via an association with the DSIF complex and causes transcriptional pausing, is counteracted by the P-TEFb kinase complex. The NELF complex is involved in HIV-1 latency possibly involving recruitment of PCF11 to paused RNA polymerase II. I…	NELF-A;WHSC2	negative elongation factor complex member A
VPS25	-1.98	1	-2.96	0.856	84313	VPS25	Component of the ESCRT-II complex (endosomal sorting complex required for transport II), which is required for multivesicular body (MVB) formation and sorting of endosomal cargo proteins into MVBs. The MVB pathway mediates delivery of transmembrane proteins into the lumen of the lysosome for degradation. The ESCRT-II complex is probably involved in the recruitment of the ESCRT-III complex. The ES…	MGC10540;EAP20;DERP9	vacuolar protein sorting 25 homolog
HIST1H2AK	-1.97	0.81	-1.29	1	8330	HIST1H2AK	Core component of nucleosome. Nucleosomes wrap and compact DNA into chromatin, limiting DNA accessibility to the cellular machineries which require DNA as a template. Histones thereby play a central role in transcription regulation, DNA repair, DNA replication and chromosomal stability. DNA accessibility is regulated via a complex set of post-translational modifications of histones, also called h…	H2A/d;H2AFD	histone cluster 1 H2A family member k
SNORD95	-1.97	0.81	-0.63	1	619570	NA	NA	NA	NA
CLDN9	-1.96	0.751	-0.54	1	9080	CLDN9	Plays a major role in tight junction-specific obliteration of the intercellular space, through calcium- independent cell-adhesion activity. {ECO:0000250}.	NA	claudin 9
BTBD10	-1.96	0.813	-0.13	1	84280	BTBD10	Plays a major role as an activator of AKT family members by inhibiting PPP2CA-mediated dephosphorylation, thereby keeping AKTs activated. Plays a role in preventing motor neuronal death and accelerating the growth of pancreatic beta cells. {ECO:0000250|UniProtKB:Q80X66}.	GMRP1;GMRP-1;MGC13007	BTB domain containing 10
AHCYL1	-1.93	0.832	-1.03	1	10768	AHCYL1	Multifaceted cellular regulator which coordinates several essential cellular functions including regulation of epithelial HCO3(-) and fluid secretion, mRNA processing and DNA replication. Regulates ITPR1 sensitivity to inositol 1,4,5- trisphosphate competing for the common binding site and acting as endogenous 'pseudoligand' whose inhibitory activity can be modulated by its phosphorylation status…	XPVKONA;IRBIT;PPP1R78	adenosylhomocysteinase like 1
FBXO3	-1.93	0.832	-0.83	1	26273	FBXO3	Substrate recognition component of the SCF (SKP1-CUL1-F- box protein)-type E3 ubiquitin ligase complex. Mediates the ubiquitination of HIPK2 and probably that of EP300, leading to rapid degradation by the proteasome. In the presence of PML, HIPK2 ubiquitination still occurs, but degradation is prevented. PML, HIPK2 and FBXO3 may act synergically to activate p53/TP53- dependent transactivation. {E…	FBX3;FBA	F-box protein 3
RAD17	-1.92	0.856	1.51	0.737	5884	RAD17	Essential for sustained cell growth, maintenance of chromosomal stability, and ATR-dependent checkpoint activation upon DNA damage. Has a weak ATPase activity required for binding to chromatin. Participates in the recruitment of the RAD1-RAD9- HUS1 complex and RHNO1 onto chromatin, and in CHEK1 activation. May also serve as a sensor of DNA replication progression, and may be involved in homologou…	Rad24;RAD17Sp;CCYC	RAD17 checkpoint clamp loader component
ATP2A3	-1.91	0.774	-0.31	1	489	ATP2A3	This magnesium-dependent enzyme catalyzes the hydrolysis of ATP coupled with the transport of calcium. Transports calcium ions from the cytosol into the sarcoplasmic/endoplasmic reticulum lumen. Contributes to calcium sequestration involved in muscular excitation/contraction. {ECO:0000269|PubMed:11956212, ECO:0000269|PubMed:15028735}.	SERCA3	ATPase sarcoplasmic/endoplasmic reticulum Ca2+ transporting 3
ITGA3	-1.9	0.903	-0.68	1	3675	ITGA3	Integrin alpha-3/beta-1 is a receptor for fibronectin, laminin, collagen, epiligrin, thrombospondin and CSPG4. Integrin alpha-3/beta-1 provides a docking site for FAP (seprase) at invadopodia plasma membranes in a collagen-dependent manner and hence may participate in the adhesion, formation of invadopodia and matrix degradation processes, promoting cell invasion. Alpha- 3/beta-1 may mediate with…	CD49c;VLA3a;VCA-2;GAP-B3;MSK18	integrin subunit alpha 3
CERS2	-1.88	0.81	-0.92	1	29956	CERS2	Suppresses the growth of cancer cells. May be involved in sphingolipid synthesis.	SP260;FLJ10243;LASS2	ceramide synthase 2
SBNO1	-1.87	1	-0.1	1	55206	SBNO1	NA	MOP3;FLJ10701;FLJ10833;Sno	strawberry notch homolog 1
SLC25A11	-1.87	0.81	-0.01	1	8402	SLC25A11	Catalyzes the transport of 2-oxoglutarate across the inner mitochondrial membrane in an electroneutral exchange for malate or other dicarboxylic acids, and plays an important role in several metabolic processes, including the malate-aspartate shuttle, the oxoglutarate/isocitrate shuttle, in gluconeogenesis from lactate, and in nitrogen metabolism (By similarity). Maintains mitochondrial fusion an…	OGC;SLC20A4	solute carrier family 25 member 11
RPP40	-1.86	1	1.43	0.988	10799	RPP40	Component of ribonuclease P, a protein complex that generates mature tRNA molecules by cleaving their 5'-ends.	bA428J1.3;RNASEP1	ribonuclease P/MRP subunit p40
OTUD7B	-1.85	0.937	-0.6	1	56957	OTUD7B	Negative regulator of the non-canonical NF-kappa-B pathway that acts by mediating deubiquitination of TRAF3, an inhibitor of the NF-kappa-B pathway, thereby acting as a negative regulator of B-cell responses. In response to non-canonical NF- kappa-B stimuli, deubiquitinates 'Lys-48'-linked polyubiquitin chains of TRAF3, preventing TRAF3 proteolysis and over-activation of non-canonical NF-kappa-B.…	CEZANNE;ZA20D1	OTU deubiquitinase 7B
GMPR	-1.85	0.813	-0.48	1	2766	GMPR	Catalyzes the irreversible NADPH-dependent deamination of GMP to IMP. It functions in the conversion of nucleobase, nucleoside and nucleotide derivatives of G to A nucleotides, and in maintaining the intracellular balance of A and G nucleotides. {ECO:0000255|HAMAP-Rule:MF 03195}.	NA	guanosine monophosphate reductase
UCMA	-1.85	0.937	0.79	1	221044	UCMA	May be involved in the negative control of osteogenic differentiation of osteochondrogenic precursor cells in peripheral zones of fetal cartilage and at the cartilage-bone interface. {ECO:0000250}.	C10orf49	upper zone of growth plate and cartilage matrix associated
TEX33	-1.84	0.832	-0.87	1	339669	TEX33	NA	MGC35206;EAN57;C22orf33	testis expressed 33
UBL4B	-1.83	0.832	-1.17	1	164153	UBL4B	NA	FLJ25690	ubiquitin like 4B
PPIL1	-1.83	1	-0.25	1	51645	PPIL1	PPIases accelerate the folding of proteins. It catalyzes the cis-trans isomerization of proline imidic peptide bonds in oligopeptides. May be involved in pre-mRNA splicing. {ECO:0000269|PubMed:16595688}.	CYPL1	peptidylprolyl isomerase like 1
NEK11	-1.82	0.943	-0.32	1	79858	NEK11	Protein kinase which plays an important role in the G2/M checkpoint response to DNA damage. Controls degradation of CDC25A by directly phosphorylating it on residues whose phosphorylation is required for BTRC-mediated polyubiquitination and degradation. {ECO:0000269|PubMed:12154088, ECO:0000269|PubMed:19734889, ECO:0000269|PubMed:20090422}.	FLJ23495	NIMA related kinase 11
CD8A	-1.82	0.943	0.14	1	925	CD8A	Integral membrane glycoprotein that plays an essential role in the immune response and serves multiple functions in responses against both external and internal offenses. In T-cells, functions primarily as a coreceptor for MHC class I molecule:peptide complex. The antigens presented by class I peptides are derived from cytosolic proteins while class II derived from extracellular proteins. Interac…	CD8	CD8a molecule
ASPG	-1.82	0.943	0.41	1	374569	ASPG	Exhibits lysophospholipase, transacylase, PAF acetylhydrolase and asparaginase activities.	C14orf76	asparaginase
CHRNB3	-1.81	0.971	-0.33	1	1142	CHRNB3	After binding acetylcholine, the AChR responds by an extensive change in conformation that affects all subunits and leads to opening of an ion-conducting channel across the plasma membrane.	NA	cholinergic receptor nicotinic beta 3 subunit
ALDOA	-1.8	1	-1.58	1	226	ALDOA	Plays a key role in glycolysis and gluconeogenesis. In addition, may also function as scaffolding protein (By similarity). {ECO:0000250}.	NA	aldolase, fructose-bisphosphate A
RNF103-CHMP3	-1.8	1	-1.23	1	100526767	NA	Probable core component of the endosomal sorting required for transport complex III (ESCRT-III) which is involved in multivesicular bodies (MVBs) formation and sorting of endosomal cargo proteins into MVBs. MVBs contain intraluminal vesicles (ILVs) that are generated by invagination and scission from the limiting membrane of the endosome and mostly are delivered to lysosomes enabling degradation …	NA	NA
POP1	-1.8	0.982	-1.22	1	10940	POP1	Component of ribonuclease P, a protein complex that generates mature tRNA molecules by cleaving their 5'-ends. Also a component of RNase MRP.	NA	POP1 homolog, ribonuclease P/MRP subunit
CCND3	-1.8	1	-1.08	1	896	CCND3	Regulatory component of the cyclin D3-CDK4 (DC) complex that phosphorylates and inhibits members of the retinoblastoma (RB) protein family including RB1 and regulates the cell-cycle during G(1)/S transition. Phosphorylation of RB1 allows dissociation of the transcription factor E2F from the RB/E2F complex and the subsequent transcription of E2F target genes which are responsible for the progressi…	NA	cyclin D3
ANO4	-1.78	1	-1.11	1	121601	ANO4	Has calcium-dependent phospholipid scramblase activity; scrambles phosphatidylserine, phosphatidylcholine and galactosylceramide. Does not exhibit calcium-activated chloride channel (CaCC) activity. {ECO:0000250|UniProtKB:Q8C5H1}.	FLJ34221;FLJ34272;FLJ35277;TMEM16D	anoctamin 4
PRDM11	-1.78	0.937	0.79	1	56981	PRDM11	May be involved in transcription regulation. {ECO:0000269|PubMed:25499759}.	PFM8	PR/SET domain 11
KDELC2	-1.77	0.937	-0.47	1	143888	KDELC2	NA	MGC33424	KDEL motif containing 2
GABPB1	-1.76	0.937	-1.17	1	2553	GABPB1	Transcription factor capable of interacting with purine rich repeats (GA repeats). Necessary for the expression of the Adenovirus E4 gene. {ECO:0000269|PubMed:10675337, ECO:0000269|PubMed:8816484}.	E4TF1-47;GABPB;GABPB2	GA binding protein transcription factor subunit beta 1
TMEM189-UBE2V1	-1.76	0.937	-0.83	1	387522	NA	Has no ubiquitin ligase activity on its own. The UBE2V1- UBE2N heterodimer catalyzes the synthesis of non-canonical poly- ubiquitin chains that are linked through Lys-63. This type of poly-ubiquitination activates IKK and does not seem to involve protein degradation by the proteasome. Plays a role in the activation of NF-kappa-B mediated by IL1B, TNF, TRAF6 and TRAF2. Mediates transcriptional act…	NA	NA
SPAG5	-1.76	1	-0.78	1	10615	SPAG5	Essential component of the mitotic spindle required for normal chromosome segregation and progression into anaphase (PubMed:11724960, PubMed:12356910, PubMed:27462074). Required for chromosome alignment, normal timing of sister chromatid segregation, and maintenance of spindle pole architecture (PubMed:17664331, PubMed:27462074). In complex with SKAP, promotes stable microtubule-kinetochore attac…	DEEPEST;MAP126;hMAP126	sperm associated antigen 5
ADPRHL2	-1.76	0.937	-0.42	1	54936	ADPRHL2	Poly(ADP-ribose) synthesized after DNA damage is only present transiently and is rapidly degraded by poly(ADP-ribose) glycohydrolase. Poly(ADP-ribose) metabolism may be required for maintenance of the normal function of neuronal cells. Generates ADP-ribose from poly-(ADP-ribose), but does not hydrolyze ADP- ribose-arginine, -cysteine, -diphthamide, or -asparagine bonds. Due to catalytic inactivit…	ARH3;FLJ20446	ADP-ribosylhydrolase like 2
LURAP1L	-1.75	1	-1.13	1	286343	LURAP1L	NA	MGC46502;FLJ38505;bA3L8.2;LRAP35b;C9orf150	leucine rich adaptor protein 1 like
CDC73	-1.75	1	-1.12	1	79577	CDC73	Tumor suppressor probably involved in transcriptional and post-transcriptional control pathways. May be involved in cell cycle progression through the regulation of cyclin D1/PRAD1 expression. Component of the PAF1 complex (PAF1C) which has multiple functions during transcription by RNA polymerase II and is implicated in regulation of development and maintenance of embryonic stem cell pluripotenc…	parafibromin;FIHP;C1orf28;HRPT2;HRPT1	cell division cycle 73
NAA50	-1.75	0.937	0	1	80218	NAA50	N-alpha-acetyltransferase that acetylates the N-terminus of proteins that retain their initiating methionine (PubMed:19744929, PubMed:22311970, PubMed:21900231, PubMed:27484799). Has a broad substrate specificity: able to acetylate the initiator methionine of most peptides, except for those with a proline in second position (PubMed:27484799). Also displays N-epsilon-acetyltransferase activity by …	FLJ13194;NAT5;San;MAK3;NAT13	N(alpha)-acetyltransferase 50, NatE catalytic subunit
REPIN1	-1.75	0.937	0.03	1	29803	REPIN1	Sequence-specific double-stranded DNA-binding protein required for initiation of chromosomal DNA replication. Binds on 5'-ATT-3' reiterated sequences downstream of the origin of bidirectional replication (OBR) and a second, homologous ATT sequence of opposite orientation situated within the OBR zone. Facilitates DNA bending.	RIP60;AP4;H DJ0584D14.12;Zfp464;ZNF464	replication initiator 1
TCF3	-1.74	1	-0.54	1	6929	TCF3	Transcriptional regulator. Involved in the initiation of neuronal differentiation. Heterodimers between TCF3 and tissue- specific basic helix-loop-helix (bHLH) proteins play major roles in determining tissue-specific cell fate during embryogenesis, like muscle or early B-cell differentiation. Dimers bind DNA on E- box motifs: 5'-CANNTG-3'. Binds to the kappa-E2 site in the kappa immunoglobulin ge…	E2A;ITF1;MGC129647;MGC129648;bHLHb21;VDIR;E47;p75	transcription factor 3
GOT1	-1.74	0.943	-0.1	1	2805	GOT1	Biosynthesis of L-glutamate from L-aspartate or L- cysteine. Important regulator of levels of glutamate, the major excitatory neurotransmitter of the vertebrate central nervous system. Acts as a scavenger of glutamate in brain neuroprotection. The aspartate aminotransferase activity is involved in hepatic glucose synthesis during development and in adipocyte glyceroneogenesis. Using L-cysteine as…	AST1	glutamic-oxaloacetic transaminase 1
NAGK	-1.74	1	0.21	1	55577	NAGK	Converts endogenous N-acetylglucosamine (GlcNAc), a major component of complex carbohydrates, from lysosomal degradation or nutritional sources into GlcNAc 6-phosphate. Involved in the N-glycolylneuraminic acid (Neu5Gc) degradation pathway: although human is not able to catalyze formation of Neu5Gc due to the inactive CMAHP enzyme, Neu5Gc is present in food and must be degraded. Also has ManNAc k…	GNK	N-acetylglucosamine kinase
LAYN	-1.73	0.943	-0.73	1	143903	LAYN	Receptor for hyaluronate. {ECO:0000269|PubMed:11294894}.	FLJ30977;FLJ31092	layilin
FBXW7	-1.73	0.943	-0.23	1	55294	FBXW7	Substrate recognition component of a SCF (SKP1-CUL1-F- box protein) E3 ubiquitin-protein ligase complex which mediates the ubiquitination and subsequent proteasomal degradation of target proteins. Recognizes and binds phosphorylated sites/phosphodegrons within target proteins and thereafter bring them to the SCF complex for ubiquitination (PubMed:17434132). Identified substrates include cyclin-E …	AGO;FLJ11071;SEL-10;SEL10;FBW7;FBX30;CDC4;FBXW6	F-box and WD repeat domain containing 7
PYGO1	-1.72	0.943	-0.63	1	26108	PYGO1	Involved in signal transduction through the Wnt pathway.	NA	pygopus family PHD finger 1
ZDHHC16	-1.72	1	-0.27	1	84287	ZDHHC16	Palmitoyl acyltransferase that mediates palmitoylation of proteins such as PLN and ZDHHC6 (PubMed:28826475). Required during embryonic heart development and cardiac function, possibly by mediating palmitoylation of PLN, thereby affecting PLN phosphorylation and homooligomerization (By similarity). Also required for eye development (By similarity). Palmitoylates ZDHHC6, affecting the quaternary as…	APH2	zinc finger DHHC-type containing 16
RNASE13	-1.72	0.943	-0.14	1	440163	RNASE13	Does not exhibit any ribonuclease activity. {ECO:0000305}.	RAL1	ribonuclease A family member 13 (inactive)
GKN1	-1.72	0.943	-0.02	1	56287	GKN1	Has mitogenic activity and may be involved in maintaining the integrity of the gastric mucosal epithelium. {ECO:0000269|PubMed:12851218}.	AMP18;CA11;BRICD1	gastrokine 1
HTATSF1	-1.71	1	-1.53	1	27336	HTATSF1	Functions as a general transcription factor playing a role in the process of transcriptional elongation. May mediate the reciprocal stimulatory effect of splicing on transcriptional elongation. In case of infection by HIV-1, it is up-regulated by the HIV-1 proteins NEF and gp120, acts as a cofactor required for the Tat-enhanced transcription of the virus. {ECO:0000269|PubMed:10393184, ECO:0000269…	TAT-SF1	HIV-1 Tat specific factor 1
RTEL1	-1.71	1	-0.98	1	51750	RTEL1	ATP-dependent DNA helicase implicated in telomere-length regulation, DNA repair and the maintenance of genomic stability. Acts as an anti-recombinase to counteract toxic recombination and limit crossover during meiosis. Regulates meiotic recombination and crossover homeostasis by physically dissociating strand invasion events and thereby promotes noncrossover repair by meiotic synthesis dependent…	bK3184A7.3;NHL;DKFZP434C013;KIAA1088;RTEL;C20orf41	regulator of telomere elongation helicase 1
THAP11	-1.7	0.982	-1.76	0.926	57215	THAP11	Transcriptional repressor that plays a central role for embryogenesis and the pluripotency of embryonic stem (ES) cells. Sequence-specific DNA-binding factor that represses gene expression in pluripotent ES cells by directly binding to key genetic loci and recruiting epigenetic modifiers (By similarity). {ECO:0000250}.	HRIHFB2206;CTG-B45d;CTG-B43a	THAP domain containing 11
SP3	-1.7	0.982	-1.17	1	6670	SP3	Transcriptional factor that can act as an activator or repressor depending on isoform and/or post-translational modifications. Binds to GT and GC boxes promoter elements. Competes with SP1 for the GC-box promoters. Weak activator of transcription but can activate a number of genes involved in different processes such as cell-cycle regulation, hormone- induction and house-keeping. {ECO:0000269|Pub…	SPR-2	Sp3 transcription factor
BCL2L1	-1.69	0.988	-1.42	1	598	BCL2L1	Potent inhibitor of cell death. Inhibits activation of caspases. Appears to regulate cell death by blocking the voltage- dependent anion channel (VDAC) by binding to it and preventing the release of the caspase activator, CYC1, from the mitochondrial membrane. Also acts as a regulator of G2 checkpoint and progression to cytokinesis during mitosis. Isoform Bcl-X(S) promotes apoptosis.	BCLX;BCL2L;Bcl-X;bcl-xL;bcl-xS;PPP1R52	BCL2 like 1
LRRN3	-1.69	0.988	-1.18	1	54674	LRRN3	NA	NLRR3;FLJ11129;FIGLER5	leucine rich repeat neuronal 3
FAM151A	-1.69	0.988	-0.25	1	338094	FAM151A	NA	MGC27169;C1orf179	family with sequence similarity 151 member A
XYLT2	-1.69	1	0.18	1	64132	XYLT2	Involved in the formation of heparan sulfate and chondroitin sulfate proteoglycans (PubMed:26027496). Probably catalyzes the first step in biosynthesis of glycosaminoglycan. Transfers D-xylose from UDP-D-xylose to specific serine residues of the core protein. Initial enzyme in the biosynthesis of chondroitin sulfate and dermatan sulfate proteoglycans in fibroblasts and chondrocytes (By similarity…	XT-II;PXYLT2	xylosyltransferase 2
EML6	-1.68	1	-1.14	1	400954	EML6	May modify the assembly dynamics of microtubules, such that microtubules are slightly longer, but more dynamic. {ECO:0000250}.	FLJ42562	EMAP like 6
EGR2	-1.68	1	-0.99	1	1959	EGR2	Sequence-specific DNA-binding transcription factor. Binds to two specific DNA sites located in the promoter region of HOXA4. {ECO:0000269|PubMed:21836637}.	KROX20	early growth response 2
ABHD5	-1.68	1	-0.5	1	51099	ABHD5	Lysophosphatidic acid acyltransferase which functions in phosphatidic acid biosynthesis (PubMed:18606822). May regulate the cellular storage of triacylglycerol through activation of the phospholipase PNPLA2 (PubMed:16679289). Involved in keratinocyte differentiation (PubMed:18832586). Regulates lipid droplet fusion (By similarity). {ECO:0000250|UniProtKB:Q9DBL9, ECO:0000269|PubMed:16679289, ECO:0…	CGI-58;NCIE2	abhydrolase domain containing 5
QRICH1	-1.67	1	-0.69	1	54870	QRICH1	NA	FLJ20259;VERBRAS;AB-DIP	glutamine rich 1
WASL	-1.66	1	-0.83	1	8976	WASL	Regulates actin polymerization by stimulating the actin- nucleating activity of the Arp2/3 complex. Involved in mitosis and cytokinesis, via its role in the regulation of actin polymerization. Binds to HSF1/HSTF1 and forms a complex on heat shock promoter elements (HSE) that negatively regulates HSP90 expression. Plays a role in dendrite spine morphogenesis (By similarity). {ECO:0000250|UniProtKB…	N-WASP;NWASP;WASPB	Wiskott-Aldrich syndrome like
MCF2	-1.66	1	-0.18	1	4168	MCF2	Guanine nucleotide exchange factor (GEF) that modulates the Rho family of GTPases. Promotes the conversion of some member of the Rho family GTPase from the GDP-bound to the GTP-bound form. Isoform 1 exhibits no activity toward RHOA, RAC1 or CDC42. Isoform 2 exhibits decreased GEF activity toward CDC42. Isoform 3 exhibits a weak but significant activity toward RAC1 and CDC42. Isoform 4 exhibits si…	DBL;ARHGEF21	MCF.2 cell line derived transforming sequence
ILF3	-1.66	1	0.02	1	3609	ILF3	RNA-binding protein that plays an essential role in the biogenesis of circular RNAs (circRNAs) which are produced by back- splicing circularization of pre-mRNAs. Within the nucleus, promotes circRNAs processing by stabilizing the regulatory elements residing in the flanking introns of the circularized exons. Plays thereby a role in the back-splicing of a subset of circRNAs (PubMed:28625552). As a…	NF90;MPHOSPH4;MPP4;DRBP76;NFAR-1	interleukin enhancer binding factor 3
TSSC1	-1.66	1	0.34	1	7260	EIPR1	NA	EIPR-1;TSSC1	EARP complex and GARP complex interacting protein 1
SMU1	-1.66	1	0.92	1	55234	SMU1	Auxiliary spliceosomal protein that regulates selection of alternative splice sites in a small set of target pre-mRNA species (Probable). Regulates alternative splicing of the HSPG2 pre-mRNA (By similarity). Required for normal mitotic spindle assembly and normal progress through mitosis (PubMed:15878348). Required for normal accumulation of IK (PubMed:24945353). {ECO:0000250|UniProtKB:Q76B40, EC…	SMU-1;FLJ10805;BWD;fSAP57	SMU1, DNA replication regulator and spliceosomal factor
TRMT12	-1.65	1	-1.1	1	55039	TRMT12	S-adenosyl-L-methionine-dependent transferase that acts as a component of the wybutosine biosynthesis pathway. Wybutosine is a hyper modified guanosine with a tricyclic base found at the 3'-position adjacent to the anticodon of eukaryotic phenylalanine tRNA. Catalyzes the transfer of the alpha-amino-alpha- carboxypropyl (acp) group from S-adenosyl-L-methionine to the C-7 position of 4-demethylwyo…	FLJ20772;Trm12;TYW2	tRNA methyltransferase 12 homolog
UBE2N	-1.64	1	-2.58	0.243	7334	UBE2N	The UBE2V1-UBE2N and UBE2V2-UBE2N heterodimers catalyze the synthesis of non-canonical 'Lys-63'-linked polyubiquitin chains. This type of polyubiquitination does not lead to protein degradation by the proteasome. Mediates transcriptional activation of target genes. Plays a role in the control of progress through the cell cycle and differentiation. Plays a role in the error-free DNA repair pathway…	UbcH-ben;UBC13;MGC8489	ubiquitin conjugating enzyme E2 N
PLD3	-1.64	1	-1.73	1	23646	PLD3	May be involved in APP processing. {ECO:0000305|PubMed:24336208}.	HU-K4	phospholipase D family member 3
DNAJC9	-1.64	1	-1.19	1	23234	DNAJC9	May play a role as co-chaperone of the Hsp70 family proteins HSPA1A, HSPA1B and HSPA8. {ECO:0000269|PubMed:17182002}.	JDD1;SB73	DnaJ heat shock protein family (Hsp40) member C9
VPS39	-1.64	1	-0.77	1	23339	VPS39	Regulator of TGF-beta/activin signaling, inhibiting SMAD3- and activating SMAD2-dependent transcription. Acts by interfering with SMAD3/SMAD4 complex formation, this would lead to inhibition of SMAD3-dependent transcription and relieve SMAD3 inhibition of SMAD2-dependent promoters, thus increasing SMAD2- dependent transcription. Does not affect TGF-beta-induced SMAD2 or SMAD3 phosphorylation, nor…	KIAA0770;VAM6	VPS39, HOPS complex subunit
ANKRD50	-1.64	1	-0.54	1	57182	ANKRD50	Involved in the endosome-to-plasma membrane trafficking and recycling of SNX27-retromer-dependent cargo proteins, such as GLUT1 (PubMed:25278552).	KIAA1223	ankyrin repeat domain 50
WAPAL	-1.63	1	-1.13	1	23063	WAPL	Regulator of sister chromatid cohesion in mitosis which negatively regulates cohesin association with chromatin. Involved in both sister chromatid cohesion during interphase and sister- chromatid resolution during early stages of mitosis. Couples DNA replication to sister chromatid cohesion. Cohesion ensures that chromosome partitioning is accurate in both meiotic and mitotic cells and plays an i…	FOE;KIAA0261;WAPAL	WAPL cohesin release factor
FKBP7	-1.63	1	-0.83	1	51661	FKBP7	PPIases accelerate the folding of proteins during protein synthesis.	FKBP23	FKBP prolyl isomerase 7
LIPH	-1.63	1	-0.78	1	200879	LIPH	Hydrolyzes specifically phosphatidic acid (PA) to produce 2-acyl lysophosphatidic acid (LPA; a potent bioactive lipid mediator) and fatty acid. Does not hydrolyze other phospholipids, like phosphatidylserine (PS), phosphatidylcholine (PC) and phosphatidylethanolamine (PE) or triacylglycerol (TG). {ECO:0000269|PubMed:12063250, ECO:0000269|PubMed:12963729}.	mPA-PLA1;PLA1B;mPA-PLA1alpha;LPDLR	lipase H
EIF4E2	-1.63	1	-0.67	1	9470	EIF4E2	Recognizes and binds the 7-methylguanosine-containing mRNA cap during an early step in the initiation (PubMed:9582349, PubMed:17368478, PubMed:25624349). Acts as a repressor of translation initiation (PubMed:22751931). In contrast to EIF4E, it is unable to bind eIF4G (EIF4G1, EIF4G2 or EIF4G3), suggesting that it acts by competing with EIF4E and block assembly of eIF4F at the cap (By similarity).…	IF4e;4EHP;EIF4EL3	eukaryotic translation initiation factor 4E family member 2
PRR13	-1.63	1	0.3	1	54458	PRR13	Negatively regulates TSP1 expression at the level of transcription. This down-regulation was shown to reduce taxane- induced apoptosis. {ECO:0000269|PubMed:16847352}.	FLJ23818;DKFZP564J157	proline rich 13
TATDN3	-1.63	1	0.45	1	128387	TATDN3	Putative deoxyribonuclease.	NA	TatD DNase domain containing 3
THAP1	-1.63	1	0.47	1	55145	THAP1	DNA-binding transcription regulator that regulates endothelial cell proliferation and G1/S cell-cycle progression. Specifically binds the 5'-[AT]NTNN[GT]GGCA[AGT]-3' core DNA sequence and acts by modulating expression of pRB-E2F cell-cycle target genes, including RRM1. Component of a THAP1/THAP3-HCFC1-OGT complex that is required for the regulation of the transcriptional activity of RRM1. May als…	FLJ10477;4833431A01Rik;DYT6	THAP domain containing 1
NSA2	-1.62	1	-0.76	1	10412	NSA2	Involved in the biogenesis of the 60S ribosomal subunit. May play a part in the quality control of pre-60S particles (By similarity). {ECO:0000250}.	HUSSY-29;HCLG1;FLJ94393;TINP1	NSA2, ribosome biogenesis homolog
UBE2E1	-1.62	1	-0.6	1	7324	UBE2E1	Accepts ubiquitin from the E1 complex and catalyzes its covalent attachment to other proteins. Catalyzes the covalent attachment of ISG15 to other proteins. Mediates the selective degradation of short-lived and abnormal proteins. In vitro also catalyzes 'Lys-48'-linked polyubiquitination. {ECO:0000269|PubMed:16428300, ECO:0000269|PubMed:20061386}.	UbcH6	ubiquitin conjugating enzyme E2 E1
PTPRA	-1.62	1	-0.23	1	5786	PTPRA	NA	LRP;HLPR;HPTPA;RPTPA;PTPRL2;PTPA	protein tyrosine phosphatase, receptor type A
CSE1L	-1.62	1	-0.06	1	1434	CSE1L	Export receptor for importin-alpha. Mediates importin- alpha re-export from the nucleus to the cytoplasm after import substrates (cargos) have been released into the nucleoplasm. In the nucleus binds cooperatively to importin-alpha and to the GTPase Ran in its active GTP-bound form. Docking of this trimeric complex to the nuclear pore complex (NPC) is mediated through binding to nucleoporins. Upo…	CAS;XPO2;CSE1	chromosome segregation 1 like
ADRA1D	-1.62	1	0.02	1	146	ADRA1D	This alpha-adrenergic receptor mediates its effect through the influx of extracellular calcium.	ADRA1R;ADRA1A;ADRA1	adrenoceptor alpha 1D
CD151	-1.61	1	-1.45	1	977	CD151	Essential for the proper assembly of the glomerular and tubular basement membranes in kidney. {ECO:0000269|PubMed:15265795}.	SFA-1;PETA-3;TSPAN24;RAPH	CD151 molecule (Raph blood group)
DARC	-1.61	1	-0.83	1	2532	ACKR1	Atypical chemokine receptor that controls chemokine levels and localization via high-affinity chemokine binding that is uncoupled from classic ligand-driven signal transduction cascades, resulting instead in chemokine sequestration, degradation, or transcytosis. Also known as interceptor (internalizing receptor) or chemokine-scavenging receptor or chemokine decoy receptor. Has a promiscuous chemo…	CCBP1;GPD;Dfy;CD234;FY;DARC	atypical chemokine receptor 1 (Duffy blood group)
LHX2	-1.61	1	-0.71	1	9355	LHX2	Acts as a transcriptional activator. Stimulates the promoter of the alpha-glycoprotein gene. Transcriptional regulatory protein involved in the control of cell differentiation in developing lymphoid and neural cell types (By similarity). {ECO:0000250}.	LH-2;hLhx2	LIM homeobox 2
NPHP3	-1.61	1	-0.48	1	27031	NPHP3	Required for normal ciliary development and function. Inhibits disheveled-1-induced canonical Wnt-signaling activity and may also play a role in the control of non-canonical Wnt signaling which regulates planar cell polarity. Probably acts as a molecular switch between different Wnt signaling pathways. Required for proper convergent extension cell movements. {ECO:0000269|PubMed:18371931}.	NPH3;KIAA2000;FLJ30691;FLJ36696;MKS7;SLSN3;CFAP31	nephrocystin 3
ARID4B	-1.6	1	-1.39	1	51742	ARID4B	Acts as a transcriptional repressor. May function in the assembly and/or enzymatic activity of the Sin3A corepressor complex or in mediating interactions between the complex and other regulatory complexes. {ECO:0000269|PubMed:12724404}.	BCAA;BRCAA1;SAP180;RBP1L1	AT-rich interaction domain 4B
C2orf80	-1.6	1	-0.88	1	389073	C2orf80	NA	LOC389073;GONDA1	chromosome 2 open reading frame 80
TGM1	-1.6	1	-0.46	1	7051	TGM1	Catalyzes the cross-linking of proteins and the conjugation of polyamines to proteins. Responsible for cross- linking epidermal proteins during formation of the stratum corneum. Involved in cell proliferation (PubMed:26220141). {ECO:0000269|PubMed:26220141}.	TGASE;TGK;LI;LI1;ICR2	transglutaminase 1
THEG	-1.6	1	-0.17	1	51298	THEG	May be involved (but not essential) in spermatogenesis. {ECO:0000250}.	CT56;THEG1	theg spermatid protein
TAS1R3	-1.6	1	0	1	83756	TAS1R3	Putative taste receptor. TAS1R1/TAS1R3 responds to the umami taste stimulus (the taste of monosodium glutamate). TAS1R2/TAS1R3 recognizes diverse natural and synthetic sweeteners. TAS1R3 is essential for the recognition and response to the disaccharide trehalose (By similarity). Sequence differences within and between species can significantly influence the selectivity and specificity of taste re…	T1R3	taste 1 receptor member 3
CENPK	-1.6	1	0.04	1	64105	CENPK	Component of the CENPA-CAD (nucleosome distal) complex, a complex recruited to centromeres which is involved in assembly of kinetochore proteins, mitotic progression and chromosome segregation. May be involved in incorporation of newly synthesized CENPA into centromeres via its interaction with the CENPA-NAC complex. Acts in coordination with KNL1 to recruit the NDC80 complex to the outer kinetoc…	FKSG14;SOLT;CENP-K	centromere protein K
FAM156B	-1.59	1	-1.01	1	727866	FAM156B	NA	TMEM29B	family with sequence similarity 156 member B
FAM156A	-1.59	1	-1.01	1	29057	FAM156A	NA	PRO0659;TMEM29	family with sequence similarity 156 member A
COG1	-1.59	1	-0.85	1	9382	COG1	Required for normal Golgi function. {ECO:0000250}.	KIAA1381;LDLB	component of oligomeric golgi complex 1
CCRL2	-1.59	1	-0.78	1	9034	CCRL2	Receptor for CCL19 and chemerin/RARRES2. Does not appear to be a signaling receptor, but may have a role in modulating chemokine-triggered immune responses by capturing and internalizing CCL19 or by presenting RARRES2 ligand to CMKLR1, a functional signaling receptors. Plays a critical role for the development of Th2 responses.	HCR;CRAM-B;CKRX;CRAM-A;ACKR5	C-C motif chemokine receptor like 2
NIPBL	-1.59	1	-0.2	1	25836	NIPBL	Plays an important role in the loading of the cohesin complex on to DNA. Forms a heterodimeric complex (also known as cohesin loading complex) with MAU2/SCC4 which mediates the loading of the cohesin complex onto chromatin (PubMed:22628566, PubMed:28914604). Plays a role in cohesin loading at sites of DNA damage. Its recruitement to double-strand breaks (DSBs) sites occurs in a CBX3-, RNF8- and R…	IDN3;DKFZp434L1319;FLJ11203;FLJ12597;FLJ13354;FLJ13648;Scc2	NIPBL, cohesin loading factor
CXorf67	-1.59	1	0.02	1	340602	CXorf67	NA	NA	chromosome X open reading frame 67
TARBP1	-1.59	1	0.36	1	6894	TARBP1	Probable S-adenosyl-L-methionine-dependent methyltransferase which methylates RNA molecules such as tRNAs. In case of infection by HIV-1, it binds to the loop region of TAR RNA, a region also bound by RNA polymerase II. Binding of TARBP1 and RNA polymerase II to HIV-1 TAR RNA is mutually exclusive, suggesting that TARBP1 may function alone or in conjunction with HIV-1 Tat to disengage RNA polymer…	TRP-185;TRM3;TRMT3	TAR (HIV-1) RNA binding protein 1
EEFSEC	-1.58	1	-4.11	0.0095	60678	EEFSEC	Translation factor necessary for the incorporation of selenocysteine into proteins. It probably replaces EF-Tu for the insertion of selenocysteine directed by the UGA codon. SelB binds GTP and GDP.	SELB;EFSEC;eEFSec	eukaryotic elongation factor, selenocysteine-tRNA specific
PRKAA1	-1.58	1	-1.41	1	5562	PRKAA1	Catalytic subunit of AMP-activated protein kinase (AMPK), an energy sensor protein kinase that plays a key role in regulating cellular energy metabolism. In response to reduction of intracellular ATP levels, AMPK activates energy-producing pathways and inhibits energy-consuming processes: inhibits protein, carbohydrate and lipid biosynthesis, as well as cell growth and proliferation. AMPK acts vi…	AMPKa1	protein kinase AMP-activated catalytic subunit alpha 1
THRSP	-1.58	1	-0.59	1	7069	THRSP	Plays a role in the regulation of lipogenesis, especially in lactating mammary gland. Important for the biosynthesis of triglycerides with medium-length fatty acid chains. May modulate lipogenesis by interacting with MID1IP1 and preventing its interaction with ACACA (By similarity). May function as transcriptional coactivator. May modulate the transcription factor activity of THRB. {ECO:0000250, …	SPOT14;Lpgp;S14;THRP;LPGP1	thyroid hormone responsive
CD79B	-1.58	1	-0.22	1	974	CD79B	Required in cooperation with CD79A for initiation of the signal transduction cascade activated by the B-cell antigen receptor complex (BCR) which leads to internalization of the complex, trafficking to late endosomes and antigen presentation. Enhances phosphorylation of CD79A, possibly by recruiting kinases which phosphorylate CD79A or by recruiting proteins which bind to CD79A and protect it fro…	B29;IGB	CD79b molecule
SCAF1	-1.58	1	-0.05	1	58506	SCAF1	May function in pre-mRNA splicing. {ECO:0000250}.	SR-A1;FLJ00034	SR-related CTD associated factor 1
FAM154B	-1.58	1	0.67	1	283726	SAXO2	NA	DKFZp666G057;FAM154B	stabilizer of axonemal microtubules 2
ALOX15	-1.57	1	-1.34	1	246	ALOX15	Non-heme iron-containing dioxygenase that catalyzes the stereo-specific peroxidation of free and esterified polyunsaturated fatty acids generating a spectrum of bioactive lipid mediators. Converts arachidonic acid into 12- hydroperoxyeicosatetraenoic acid/12-HPETE and 15- hydroperoxyeicosatetraenoic acid/15-HPETE. Also converts linoleic acid to 13-hydroperoxyoctadecadienoic acid. May also act on …	15-LOX-1	arachidonate 15-lipoxygenase
COL5A3	-1.57	1	-0.95	1	50509	COL5A3	Type V collagen is a member of group I collagen (fibrillar forming collagen). It is a minor connective tissue component of nearly ubiquitous distribution. Type V collagen binds to DNA, heparan sulfate, thrombospondin, heparin, and insulin.	NA	collagen type V alpha 3 chain
MEN1	-1.57	1	-0.59	1	4221	MEN1	Essential component of a MLL/SET1 histone methyltransferase (HMT) complex, a complex that specifically methylates 'Lys-4' of histone H3 (H3K4). Functions as a transcriptional regulator. Binds to the TERT promoter and represses telomerase expression. Plays a role in TGFB1-mediated inhibition of cell-proliferation, possibly regulating SMAD3 transcriptional activity. Represses JUND-mediated transcri…	NA	menin 1
BFSP1	-1.57	1	-0.06	1	631	BFSP1	NA	CP94;CP115;LIFL-H;filensin	beaded filament structural protein 1
TXN	-1.57	1	0.73	1	7295	TXN	Participates in various redox reactions through the reversible oxidation of its active center dithiol to a disulfide and catalyzes dithiol-disulfide exchange reactions. Plays a role in the reversible S-nitrosylation of cysteine residues in target proteins, and thereby contributes to the response to intracellular nitric oxide. Nitrosylates the active site Cys of CASP3 in response to nitric oxide (…	TRX	thioredoxin
ADK	-1.56	1	-1.91	0.657	132	ADK	ATP dependent phosphorylation of adenosine and other related nucleoside analogs to monophosphate derivatives. Serves as a potential regulator of concentrations of extracellular adenosine and intracellular adenine nucleotides.	AK	adenosine kinase
RALGDS	-1.56	1	-1.2	1	5900	RALGDS	Stimulates the dissociation of GDP from the Ras-related RalA and RalB GTPases which allows GTP binding and activation of the GTPases. Interacts and acts as an effector molecule for R-Ras, H-Ras, K-Ras, and Rap.	RGF;RalGEF;RGDS	ral guanine nucleotide dissociation stimulator
KDM4A	-1.56	1	-0.96	1	9682	KDM4A	Histone demethylase that specifically demethylates 'Lys- 9' and 'Lys-36' residues of histone H3, thereby playing a central role in histone code (PubMed:26741168). Does not demethylate histone H3 'Lys-4', H3 'Lys-27' nor H4 'Lys-20'. Demethylates trimethylated H3 'Lys-9' and H3 'Lys-36' residue, while it has no activity on mono- and dimethylated residues. Demethylation of Lys residue generates for…	KIAA0677;JHDM3A;TDRD14A;JMJD2;JMJD2A	lysine demethylase 4A
CNOT2	-1.56	1	-0.95	1	4848	CNOT2	Component of the CCR4-NOT complex which is one of the major cellular mRNA deadenylases and is linked to various cellular processes including bulk mRNA degradation, miRNA-mediated repression, translational repression during translational initiation and general transcription regulation. Additional complex functions may be a consequence of its influence on mRNA expression. Required for the CCR4-NOT …	CDC36;NOT2H;NOT2	CCR4-NOT transcription complex subunit 2
SNX1	-1.56	1	-0.88	1	6642	SNX1	Involved in several stages of intracellular trafficking. Interacts with membranes containing phosphatidylinositol 3- phosphate (PtdIns(3P)) or phosphatidylinositol 3,5-bisphosphate (PtdIns(3,5)P2) (PubMed:12198132). Acts in part as component of the retromer membrane-deforming SNX-BAR subcomplex. The SNX-BAR retromer mediates retrograde transport of cargo proteins from endosomes to the trans-Golgi…	SNX1A;MGC8664;HsT17379;Vps5	sorting nexin 1
SETX	-1.56	1	-0.68	1	23064	SETX	Probable RNA/DNA helicase involved in diverse aspects of RNA metabolism and genomic integrity. Plays a role in transcription regulation by its ability to modulate RNA Polymerase II (Pol II) binding to chromatin and through its interaction with proteins involved in transcription (PubMed:19515850, PubMed:21700224). Contributes to the mRNA splicing efficiency and splice site selection (PubMed:195158…	KIAA0625;AOA2;Sen1;ALS4;SCAR1	senataxin
E2F4	-1.56	1	-0.65	1	1874	E2F4	Transcription activator that binds DNA cooperatively with DP proteins through the E2 recognition site, 5'-TTTC[CG]CGC- 3' found in the promoter region of a number of genes whose products are involved in cell cycle regulation or in DNA replication. The DRTF1/E2F complex functions in the control of cell-cycle progression from G1 to S phase. E2F4 binds with high affinity to RBL1 and RBL2. In some in…	E2F-4	E2F transcription factor 4
LAS1L	-1.56	1	-0.43	1	81887	LAS1L	Involved in the biogenesis of the 60S ribosomal subunit. Required for maturation of the 28S rRNA. Functions as a component of the Five Friends of Methylated CHTOP (5FMC) complex; the 5FMC complex is recruited to ZNF148 by methylated CHTOP, leading to desumoylation of ZNF148 and subsequent transactivation of ZNF148 target genes. {ECO:0000269|PubMed:20647540, ECO:0000269|PubMed:22872859}.	FLJ12525	LAS1 like, ribosome biogenesis factor
RBM46	-1.56	1	-0.21	1	166863	RBM46	NA	MGC27016;CT68	RNA binding motif protein 46
PSMC2	-1.56	1	-0.15	1	5701	PSMC2	Component of the 26S proteasome, a multiprotein complex involved in the ATP-dependent degradation of ubiquitinated proteins. This complex plays a key role in the maintenance of protein homeostasis by removing misfolded or damaged proteins, which could impair cellular functions, and by removing proteins whose functions are no longer required. Therefore, the proteasome participates in numerous cell…	MSS1;S7;Nbla10058	proteasome 26S subunit, ATPase 2
CHP1	-1.55	1	-0.67	1	11261	CHP1	Calcium-binding protein involved in different processes such as regulation of vesicular trafficking, plasma membrane Na(+)/H(+) exchanger and gene transcription. Involved in the constitutive exocytic membrane traffic. Mediates the association between microtubules and membrane-bound organelles of the endoplasmic reticulum and Golgi apparatus and is also required for the targeting and fusion of tra…	Sid470p;CHP;SLC9A1BP;p22;p24	calcineurin like EF-hand protein 1
TSC1	-1.55	1	-0.63	1	7248	TSC1	In complex with TSC2, inhibits the nutrient-mediated or growth factor-stimulated phosphorylation of S6K1 and EIF4EBP1 by negatively regulating mTORC1 signaling. Seems not to be required for TSC2 GAP activity towards RHEB. Implicated as a tumor suppressor. Involved in microtubule-mediated protein transport, but this seems to be due to unregulated mTOR signaling. {ECO:0000269|PubMed:12271141, ECO:0…	KIAA0243;LAM;hamartin;TSC	TSC complex subunit 1
ADCYAP1R1	-1.55	1	-0.61	1	117	ADCYAP1R1	This is a receptor for PACAP-27 and PACAP-38. The activity of this receptor is mediated by G proteins which activate adenylyl cyclase. May regulate the release of adrenocorticotropin, luteinizing hormone, growth hormone, prolactin, epinephrine, and catecholamine. May play a role in spermatogenesis and sperm motility. Causes smooth muscle relaxation and secretion in the gastrointestinal tract.	PAC1;PACAPR;PAC1R	ADCYAP receptor type I
DCLRE1B	-1.55	1	0.1	1	64858	DCLRE1B	5'-3' exonuclease that plays a central role in telomere maintenance and protection during S-phase. Participates in the protection of telomeres against non-homologous end-joining (NHEJ)- mediated repair, thereby ensuring that telomeres do not fuse. Plays a key role in telomeric loop (T loop) formation by being recruited by TERF2 at the leading end telomeres and by processing leading-end telomeres …	SNM1B;FLJ12810;FLJ13998;APOLLO	DNA cross-link repair 1B
POLR2J	-1.55	1	0.13	1	5439	POLR2J	DNA-dependent RNA polymerase catalyzes the transcription of DNA into RNA using the four ribonucleoside triphosphates as substrates. Component of RNA polymerase II which synthesizes mRNA precursors and many functional non-coding RNAs. Pol II is the central component of the basal RNA polymerase II transcription machinery. It is composed of mobile elements that move relative to each other. RPB11 is …	RPB11;hRPB14;RPB11A;RPB11m;POLR2J1	RNA polymerase II subunit J
ACADVL	-1.55	1	0.21	1	37	ACADVL	Active toward esters of long-chain and very long chain fatty acids such as palmitoyl-CoA, mysritoyl-CoA and stearoyl-CoA. Can accommodate substrate acyl chain lengths as long as 24 carbons, but shows little activity for substrates of less than 12 carbons. {ECO:0000269|PubMed:18227065}.	VLCAD;LCACD;ACAD6	acyl-CoA dehydrogenase very long chain
POC1B	-1.54	1	-1.14	1	282809	POC1B	Plays an important role in centriole assembly and/or stability and ciliogenesis (PubMed:20008567). Involved in early steps of centriole duplication, as well as in the later steps of centriole length control (PubMed:19109428). Acts in concert with POC1A to ensure centriole integrity and proper mitotic spindle formation. Required for primary cilia formation, ciliary length and also cell proliferati…	TUWD12;FLJ14923;WDR51B	POC1 centriolar protein B
AP3B2	-1.54	1	-0.92	1	8120	AP3B2	Subunit of non-clathrin- and clathrin-associated adaptor protein complex 3 (AP-3) that plays a role in protein sorting in the late-Golgi/trans-Golgi network (TGN) and/or endosomes. The AP complexes mediate both the recruitment of clathrin to membranes and the recognition of sorting signals within the cytosolic tails of transmembrane cargo molecules. AP-3 appears to be involved in the sorting of a…	NAPTB	adaptor related protein complex 3 subunit beta 2
MICAL2	-1.54	1	-0.29	1	9645	MICAL2	Nuclear monooxygenase that promotes depolymerization of F-actin by mediating oxidation of specific methionine residues on actin to form methionine-sulfoxide, resulting in actin filament disassembly and preventing repolymerization. In the absence of actin, it also functions as a NADPH oxidase producing H(2)O(2) (By similarity). Acts as a key regulator of the SRF signaling pathway elicited by nerve…	KIAA0750	microtubule associated monooxygenase, calponin and LIM domain containing 2
IPPK	-1.54	1	-0.13	1	64768	IPPK	Phosphorylates Ins(1,3,4,5,6)P5 at position 2 to form Ins(1,2,3,4,5,6)P6 (InsP6 or phytate). InsP6 is involved in many processes such as mRNA export, non-homologous end-joining, endocytosis, ion channel regulation. It also protects cells from TNF-alpha-induced apoptosis. {ECO:0000269|PubMed:12084730, ECO:0000269|PubMed:15967797}.	INSP5K2;FLJ13163;IP5K;IPK1;C9orf12	inositol-pentakisphosphate 2-kinase
PLK3	-1.54	1	0.4	1	1263	PLK3	Serine/threonine-protein kinase involved in cell cycle regulation, response to stress and Golgi disassembly. Polo-like kinases act by binding and phosphorylating proteins are that already phosphorylated on a specific motif recognized by the POLO box domains. Phosphorylates ATF2, BCL2L1, CDC25A, CDC25C, CHEK2, HIF1A, JUN, p53/TP53, p73/TP73, PTEN, TOP2A and VRK1. Involved in cell cycle regulation:…	FNK;PRK;CNK	polo like kinase 3
USE1	-1.53	1	-1.79	0.856	55850	USE1	SNARE that may be involved in targeting and fusion of Golgi-derived retrograde transport vesicles with the ER. {ECO:0000269|PubMed:15272311}.	p31;SLT1;MDS032;D12	unconventional SNARE in the ER 1
LRCH1	-1.53	1	-1.5	1	23143	LRCH1	Acts as a negative regulator of GTPase CDC42 by sequestering CDC42-guanine exchange factor DOCK8. Probably by preventing CDC42 activation, negatively regulates CD4(+) T-cell migration. {ECO:0000269|PubMed:28028151}.	KIAA1016;CHDC1	leucine rich repeats and calponin homology domain containing 1
BASP1	-1.53	1	-0.89	1	10409	BASP1	NA	NAP-22;NAP22;CAP23;CAP-23	brain abundant membrane attached signal protein 1
LMF1	-1.53	1	0.22	1	64788	LMF1	Involved in the maturation of specific proteins in the endoplasmic reticulum. Required for maturation and transport of active lipoprotein lipase (LPL) through the secretory pathway. Each LMF1 molecule chaperones 50 or more molecules of LPL. {ECO:0000250|UniProtKB:Q3U3R4, ECO:0000269|PubMed:24909692}.	FLJ12681;JFP11;FLJ22302;TMEM112A;C16orf26;TMEM112	lipase maturation factor 1
NOP16	-1.53	1	0.31	1	51491	NOP16	NA	HSPC111;HSPC185;LOC51491	NOP16 nucleolar protein
CCNY	-1.52	1	-0.77	1	219771	CCNY	Positive regulatory subunit of the cyclin-dependent kinases CDK14/PFTK1 and CDK16. Acts as a cell-cycle regulator of Wnt signaling pathway during G2/M phase by recruiting CDK14/PFTK1 to the plasma membrane and promoting phosphorylation of LRP6, leading to the activation of the Wnt signaling pathway. Recruits CDK16 to the plasma membrane. Isoform 3 might play a role in the activation of MYC-mediat…	CFP1;CBCP1;C10orf9	cyclin Y
CACNA1D	-1.52	1	0.3	1	776	CACNA1D	Voltage-sensitive calcium channels (VSCC) mediate the entry of calcium ions into excitable cells and are also involved in a variety of calcium-dependent processes, including muscle contraction, hormone or neurotransmitter release, gene expression, cell motility, cell division and cell death. The isoform alpha-1D gives rise to L-type calcium currents. Long-lasting (L-type) calcium channels belong …	Cav1.3;CACH3;CACN4;CCHL1A2;CACNL1A2	calcium voltage-gated channel subunit alpha1 D
BID	-1.51	1	-1.09	1	637	BID	The major proteolytic product p15 BID allows the release of cytochrome c (By similarity). Isoform 1, isoform 2 and isoform 4 induce ICE-like proteases and apoptosis. Isoform 3 does not induce apoptosis. Counters the protective effect of Bcl-2. {ECO:0000250, ECO:0000269|PubMed:14583606}.	NA	BH3 interacting domain death agonist
TXNRD3	-1.51	1	-0.84	1	114112	TXNRD3	Displays thioredoxin reductase, glutaredoxin and glutathione reductase activities. Catalyzes disulfide bond isomerization. Promotes disulfide bond formation between GPX4 and various sperm proteins and may play a role in sperm maturation by promoting formation of sperm structural components (By similarity). {ECO:0000250|UniProtKB:Q99MD6}.	TR2;TRXR3;TGR	thioredoxin reductase 3
CSPG4	-1.51	1	-0.63	1	1464	CSPG4	Proteoglycan playing a role in cell proliferation and migration which stimulates endothelial cells motility during microvascular morphogenesis. May also inhibit neurite outgrowth and growth cone collapse during axon regeneration. Cell surface receptor for collagen alpha 2(VI) which may confer cells ability to migrate on that substrate. Binds through its extracellular N- terminus growth factors, e…	MCSPG;MEL-CSPG;MSK16;NG2;MCSP;HMW-MAA	chondroitin sulfate proteoglycan 4
CCAR2	-1.51	1	-0.58	1	57805	CCAR2	Core component of the DBIRD complex, a multiprotein complex that acts at the interface between core mRNP particles and RNA polymerase II (RNAPII) and integrates transcript elongation with the regulation of alternative splicing: the DBIRD complex affects local transcript elongation rates and alternative splicing of a large set of exons embedded in (A + T)-rich DNA regions. Inhibits SIRT1 deacetyla…	DBC-1;DBC1;NET35;KIAA1967	cell cycle and apoptosis regulator 2
PRMT7	-1.51	1	-0.53	1	54496	PRMT7	Arginine methyltransferase that can both catalyze the formation of omega-N monomethylarginine (MMA) and symmetrical dimethylarginine (sDMA), with a preference for the formation of MMA. Specifically mediates the symmetrical dimethylation of arginine residues in the small nuclear ribonucleoproteins Sm D1 (SNRPD1) and Sm D3 (SNRPD3); such methylation being required for the assembly and biogenesis of…	FLJ10640;KIAA1933	protein arginine methyltransferase 7
POPDC3	-1.51	1	-0.41	1	64208	POPDC3	May play a role in the maintenance of heart function mediated, at least in part, through cAMP-binding. {ECO:0000250|UniProtKB:Q9ES81, ECO:0000269|PubMed:10882522}.	POP3;MGC22671;bA355M14.1	popeye domain containing 3
VAC14	-1.51	1	-0.27	1	55697	VAC14	The PI(3,5)P2 regulatory complex regulates both the synthesis and turnover of phosphatidylinositol 3,5-bisphosphate (PtdIns(3,5)P2). Acts as a positive activator of PIKfyve kinase activity. Also required to maintain normal levels of phosphatidylinositol 3-phosphate (PtdIns(3)P) and phosphatidylinositol 5-phosphate (PtdIns(5)P). Plays a role in the biogenesis of endosome carrier vesicles (ECV) / m…	FLJ10305;ArPIKfyve;TAX1BP2	Vac14, PIKFYVE complex component
ZNF292	-1.51	1	-0.12	1	23036	ZNF292	May be involved in transcriptional regulation.	KIAA0530;ZFP292;bA393I2.3;Zn-15;Zn-16	zinc finger protein 292
RNF2	-1.51	1	0.05	1	6045	RNF2	E3 ubiquitin-protein ligase that mediates monoubiquitination of 'Lys-119' of histone H2A (H2AK119Ub), thereby playing a central role in histone code and gene regulation (PubMed:15386022, PubMed:16359901, PubMed:25519132, PubMed:21772249, PubMed:25355358, PubMed:26151332). H2AK119Ub gives a specific tag for epigenetic transcriptional repression and participates in X chromosome inactivation of fema…	BAP-1;BAP1;DING;HIPI3;RING1B;RING2	ring finger protein 2
TSC22D4	-1.51	1	0.06	1	81628	TSC22D4	Transcriptional repressor.	THG-1;TILZ2	TSC22 domain family member 4
AP1G2	-1.51	1	0.17	1	8906	AP1G2	May function in protein sorting in late endosomes or multivesucular bodies (MVBs). Involved in MVB-assisted maturation of hepatitis B virus (HBV). {ECO:0000269|PubMed:16867982, ECO:0000269|PubMed:17553870, ECO:0000269|PubMed:9733768}.	G2AD	adaptor related protein complex 1 subunit gamma 2
CLC	-1.51	1	0.26	1	1178	CLC	Regulates immune responses through the recognition of cell-surface glycans. Essential for the anergy and suppressive function of CD25-positive regulatory T-cells (Treg). {ECO:0000269|PubMed:17502455}.	LGALS10;MGC149659;Gal-10	Charcot-Leyden crystal galectin
LARS	-1.51	1	1.6	1	51520	LARS	Catalyzes the specific attachment of an amino acid to its cognate tRNA in a two step reaction: the amino acid (AA) is first activated by ATP to form AA-AMP and then transferred to the acceptor end of the tRNA. Exhibits a post-transfer editing activity to hydrolyze mischarged tRNAs. {ECO:0000269|PubMed:19426743}.	HSPC192;FLJ10595;FLJ21788;LARS1;LEUS;RNTLS	leucyl-tRNA synthetase
USP5	-1.5	1	-1.35	1	8078	USP5	Cleaves linear and branched multiubiquitin polymers with a marked preference for branched polymers. Involved in unanchored 'Lys-48'-linked polyubiquitin disassembly. Binds linear and 'Lys- 63'-linked polyubiquitin with a lower affinity. Knock-down of USP5 causes the accumulation of p53/TP53 and an increase in p53/TP53 transcriptional activity because the unanchored polyubiquitin that accumulates …	IsoT	ubiquitin specific peptidase 5
GUK1	-1.5	1	-1.21	1	2987	GUK1	Essential for recycling GMP and indirectly, cGMP.	NA	guanylate kinase 1
OR1A1	-1.5	1	-0.77	1	8383	OR1A1	Odorant receptor. {ECO:0000305}.	OR17-7	olfactory receptor family 1 subfamily A member 1
USP3	-1.5	1	-0.38	1	9960	USP3	Hydrolase that deubiquitinates monoubiquitinated target proteins such as histone H2A and H2B. Required for proper progression through S phase and subsequent mitotic entry. May regulate the DNA damage response (DDR) checkpoint through deubiquitination of H2A at DNA damage sites. Associates with the chromatin. {ECO:0000269|PubMed:17980597}.	NA	ubiquitin specific peptidase 3
PRG2	-1.5	1	-0.32	1	5553	PRG2	Cytotoxin and helminthotoxin. Also induces non-cytolytic histamine release from human basophils. Involved in antiparasitic defense mechanisms and immune hypersensitivity reactions. The proform acts as a proteinase inhibitor, reducing the activity of PAPPA. {ECO:0000269|PubMed:10913121}.	MBP;BMPG;proMBP	proteoglycan 2, pro eosinophil major basic protein
SLAMF6	-1.5	1	0	1	114836	SLAMF6	Self-ligand receptor of the signaling lymphocytic activation molecule (SLAM) family. SLAM receptors triggered by homo- or heterotypic cell-cell interactions are modulating the activation and differentiation of a wide variety of immune cells and thus are involved in the regulation and interconnection of both innate and adaptive immune response. Activities are controlled by presence or absence of s…	KALI;NTBA;KALIb;Ly108;SF2000;NTB-A;CD352	SLAM family member 6
MLYCD	-1.5	1	0.25	1	23417	MLYCD	Catalyzes the conversion of malonyl-CoA to acetyl-CoA. In the fatty acid biosynthesis MCD selectively removes malonyl-CoA and thus assures that methyl-malonyl-CoA is the only chain elongating substrate for fatty acid synthase and that fatty acids with multiple methyl side chains are produced. In peroxisomes it may be involved in degrading intraperoxisomal malonyl-CoA, which is generated by the pe…	MCD;hMCD	malonyl-CoA decarboxylase
SMG5	-1.49	1	-1.52	1	23381	SMG5	Plays a role in nonsense-mediated mRNA decay. Does not have RNase activity by itself. Promotes dephosphorylation of UPF1. Together with SMG7 is thought to provide a link to the mRNA degradation machinery involving exonucleolytic pathways, and to serve as an adapter for UPF1 to protein phosphatase 2A (PP2A), thereby triggering UPF1 dephosphorylation. Necessary for TERT activity. {ECO:0000269|PubMe…	KIAA1089;LPTS-RP1;LPTSRP1;RP11-54H19.7;SMG-5;EST1B	SMG5, nonsense mediated mRNA decay factor
VAMP1	-1.49	1	-1.5	1	6843	VAMP1	Involved in the targeting and/or fusion of transport vesicles to their target membrane.	VAMP-1;SYB1	vesicle associated membrane protein 1
MAGEC1	-1.49	1	-0.6	1	9947	MAGEC1	NA	MAGE-C1;CT7;MGC39366;CT7.1	MAGE family member C1
TTC1	-1.49	1	-0.59	1	7265	TTC1	NA	TPR1	tetratricopeptide repeat domain 1
PPFIBP2	-1.49	1	-0.22	1	8495	PPFIBP2	May regulate the disassembly of focal adhesions. Did not bind receptor-like tyrosine phosphatases type 2A. {ECO:0000269|PubMed:9624153}.	Cclp1	PPFIA binding protein 2
MRGPRX3	-1.49	1	0	1	117195	MRGPRX3	Orphan receptor. Probably involved in the function of nociceptive neurons. May regulate nociceptor function and/or development, including the sensation or modulation of pain. Potently activated by enkephalins (By similarity). {ECO:0000250}.	MRGX3	MAS related GPR family member X3
NDUFA4L2	-1.49	1	0	1	56901	NDUFA4L2	NA	NUOMS;FLJ26118	NDUFA4, mitochondrial complex associated like 2
TMEM171	-1.48	1	-0.67	1	134285	TMEM171	NA	PRP2	transmembrane protein 171
ZBED4	-1.48	1	-0.58	1	9889	ZBED4	NA	KIAA0637	zinc finger BED-type containing 4
DTWD2	-1.48	1	-0.54	1	285605	DTWD2	NA	FLJ33977	DTW domain containing 2
SMAP2	-1.48	1	-0.42	1	64744	SMAP2	GTPase activating protein that acts on ARF1. Can also activate ARF6 (in vitro). May play a role in clathrin-dependent retrograde transport from early endosomes to the trans-Golgi network (By similarity). {ECO:0000250}.	SMAP1L	small ArfGAP2
RHBDF2	-1.48	1	-0.31	1	79651	RHBDF2	Rhomboid protease-like protein which has no protease activity but regulates the secretion of several ligands of the epidermal growth factor receptor. Indirectly activates the epidermal growth factor receptor signaling pathway and may thereby regulate sleep, cell survival, proliferation and migration (By similarity). {ECO:0000250}.	FLJ22341;RHBDL5;TOCG;iRhom2;RHBDL6;TOC	rhomboid 5 homolog 2
KIAA1024	-1.48	1	0.02	1	23251	MINAR1	NA	UBTOR;KIAA1024	membrane integral NOTCH2 associated receptor 1
ACRBP	-1.48	1	0.31	1	84519	ACRBP	May be involved in packaging and condensation of the acrosin zymogen in the acrosomal matrix via its association with proacrosin. {ECO:0000250}.	SP32;OY-TES-1;CT23	acrosin binding protein
CDS2	-1.47	1	-1.55	1	8760	CDS2	Provides CDP-diacylglycerol, an important precursor for the synthesis of phosphatidylinositol, phosphatidylglycerol, and cardiolipin.	NA	CDP-diacylglycerol synthase 2
TMEM189	-1.47	1	-1.13	1	387521	TMEM189	NA	Kua	transmembrane protein 189
IQCE	-1.47	1	-0.66	1	23288	IQCE	Component of the EvC complex that positively regulates ciliary Hedgehog (Hh) signaling. {ECO:0000250|UniProtKB:Q6PCQ0}.	KIAA1023	IQ motif containing E
HTR3E	-1.47	1	-0.48	1	285242	HTR3E	This is one of the several different receptors for 5- hydroxytryptamine (serotonin), a biogenic hormone that functions as a neurotransmitter, a hormone, and a mitogen. This receptor is a ligand-gated ion channel, which when activated causes fast, depolarizing responses. It is a cation-specific, but otherwise relatively nonselective, ion channel.	NA	5-hydroxytryptamine receptor 3E
PIGO	-1.47	1	-0.39	1	84720	PIGO	Ethanolamine phosphate transferase involved in glycosylphosphatidylinositol-anchor biosynthesis. Transfers ethanolamine phosphate to the GPI third mannose which links the GPI-anchor to the C-terminus of the proteins by an amide bond. {ECO:0000269|PubMed:24049131, ECO:0000269|PubMed:28337824}.	DKFZp434M222;FLJ00135	phosphatidylinositol glycan anchor biosynthesis class O
LAMTOR4	-1.47	1	-0.26	1	389541	LAMTOR4	As part of the Ragulator complex it is involved in amino acid sensing and activation of mTORC1, a signaling complex promoting cell growth in response to growth factors, energy levels, and amino acids. Activated by amino acids through a mechanism involving the lysosomal V-ATPase, the Ragulator functions as a guanine nucleotide exchange factor activating the small GTPases Rag. Activated Ragulator a…	C7orf59	late endosomal/lysosomal adaptor, MAPK and MTOR activator 4
SLC46A3	-1.47	1	-0.19	1	283537	SLC46A3	NA	DKFZp686A1775;FLJ42613	solute carrier family 46 member 3
COL25A1	-1.47	1	0.12	1	84570	COL25A1	Inhibits fibrillization of amyloid-beta peptide during the elongation phase. Has also been shown to assemble amyloid fibrils into protease-resistant aggregates. Binds heparin. {ECO:0000269|PubMed:15522881, ECO:0000269|PubMed:15615705, ECO:0000269|PubMed:15853808, ECO:0000269|PubMed:16300410}.	NA	collagen type XXV alpha 1 chain
ZNF513	-1.47	1	0.33	1	130557	ZNF513	Transcriptional regulator that plays a role in retinal development and maintenance. {ECO:0000269|PubMed:20797688}.	FLJ32203;RP58	zinc finger protein 513
UBA1	-1.46	1	-1.7	1	7317	UBA1	Catalyzes the first step in ubiquitin conjugation to mark cellular proteins for degradation through the ubiquitin- proteasome system (PubMed:1606621, PubMed:1447181). Activates ubiquitin by first adenylating its C-terminal glycine residue with ATP, and thereafter linking this residue to the side chain of a cysteine residue in E1, yielding a ubiquitin-E1 thioester and free AMP (PubMed:1447181). Es…	UBE1X;POC20;CFAP124;A1S9T;GXP1;UBE1	ubiquitin like modifier activating enzyme 1
COPS4	-1.46	1	-1.46	1	51138	COPS4	Component of the COP9 signalosome complex (CSN), a complex involved in various cellular and developmental processes. The CSN complex is an essential regulator of the ubiquitin (Ubl) conjugation pathway by mediating the deneddylation of the cullin subunits of SCF-type E3 ligase complexes, leading to decrease the Ubl ligase activity of SCF-type complexes such as SCF, CSA or DDB2. Also involved in t…	CSN4	COP9 signalosome subunit 4
RBM42	-1.46	1	-0.66	1	79171	RBM42	Binds (via the RRM domain) to the 3'-untranslated region (UTR) of CDKN1A mRNA. {ECO:0000250}.	MGC10433	RNA binding motif protein 42
ARHGAP22	-1.46	1	-0.57	1	58504	ARHGAP22	Rho GTPase-activating protein involved in the signal transduction pathway that regulates endothelial cell capillary tube formation during angiogenesis. Acts as a GTPase activator for the RAC1 by converting it to an inactive GDP-bound state. Inhibits RAC1-dependent lamellipodia formation. May also play a role in transcription regulation via its interaction with VEZF1, by regulating activity of the…	RhoGAP2	Rho GTPase activating protein 22
SIX3	-1.46	1	-0.39	1	6496	SIX3	Transcriptional regulator which can act as both a transcriptional repressor and activator by binding a ATTA homeodomain core recognition sequence on these target genes. During forebrain development represses WNT1 expression allowing zona limitans intrathalamica formation and thereby ensuring proper anterio-posterior patterning of the diencephalon and formation of the rostral diencephalon. Acts as…	HPE2	SIX homeobox 3
ESD	-1.46	1	-0.11	1	2098	ESD	Serine hydrolase involved in the detoxification of formaldehyde. {ECO:0000269|PubMed:3770744, ECO:0000269|PubMed:4768551}.	NA	esterase D
CCT6B	-1.46	1	-0.04	1	10693	CCT6B	Molecular chaperone; assists the folding of proteins upon ATP hydrolysis. Known to play a role, in vitro, in the folding of actin and tubulin (By similarity). {ECO:0000250}.	Cctz2;TSA303	chaperonin containing TCP1 subunit 6B
FBXO9	-1.46	1	0.08	1	26268	FBXO9	Substrate recognition component of a SCF (SKP1-CUL1-F- box protein) E3 ubiquitin-protein ligase complex which mediates the ubiquitination and subsequent proteasomal degradation of TTI1 and TELO2 in a CK2-dependent manner, thereby directly regulating mTOR signaling. SCF(FBXO9) recognizes and binds mTORC1-bound TTI1 and TELO2 when they are phosphorylated by CK2 following growth factor deprivation, …	FBX9;NY-REN-57	F-box protein 9
FGFBP2	-1.45	1	-1.19	1	83888	FGFBP2	NA	KSP37	fibroblast growth factor binding protein 2
P2RY2	-1.45	1	-0.99	1	5029	P2RY2	Receptor for ATP and UTP coupled to G-proteins that activate a phosphatidylinositol-calcium second messenger system. The affinity range is UTP = ATP > ATP-gamma-S >> 2-methylthio-ATP = ADP.	P2U	purinergic receptor P2Y2
SH2D7	-1.45	1	-0.87	1	646892	SH2D7	NA	LOC646892	SH2 domain containing 7
ERCC4	-1.45	1	-0.61	1	2072	ERCC4	Catalytic component of a structure-specific DNA repair endonuclease responsible for the 5-prime incision during DNA repair. Involved in homologous recombination that assists in removing interstrand cross-link. {ECO:0000269|PubMed:19596235}.	RAD1;FANCQ;XPF	ERCC excision repair 4, endonuclease catalytic subunit
WDR45	-1.45	1	-0.51	1	11152	WDR45	Plays an important role in the autophagy pathway, which is the major intracellular degradation system by which cytoplasmic materials are packaged into autophagosomes and delivered to lysosomes for degradation. {ECO:0000269|PubMed:23435086}.	JM5;WIPI4;NBIA5;WDRX1	WD repeat domain 45
E2F3	-1.45	1	-0.18	1	1871	E2F3	Transcription activator that binds DNA cooperatively with DP proteins through the E2 recognition site, 5'-TTTC[CG]CGC- 3' found in the promoter region of a number of genes whose products are involved in cell cycle regulation or in DNA replication. The DRTF1/E2F complex functions in the control of cell-cycle progression from G1 to S phase. E2F3 binds specifically to RB1 in a cell-cycle dependent m…	NA	E2F transcription factor 3
CSPP1	-1.45	1	0.08	1	79848	CSPP1	May play a role in cell-cycle-dependent microtubule organization. {ECO:0000269|PubMed:16826565}.	FLJ22490;CSPP;JBTS21	centrosome and spindle pole associated protein 1
A3GALT2	-1.45	1	0.35	1	127550	A3GALT2	Synthesizes the galactose-alpha(1,3)-galactose group on the glycosphingolipid isoglobotrihexosylceramide or isogloboside 3 (iGb3) by catalyzing the transfer of galactose from UDP-Galactose to its acceptor molecule Gal-beta-1,4-Glc-ceramide. Can also catalyze the addition of galactose to iGb3 itself to form polygalactose structures. {ECO:0000305|PubMed:23378701}.	IGBS3S;IGB3S;A3GALT2P	alpha 1,3-galactosyltransferase 2
ZNF845	-1.45	1	0.8	1	91664	ZNF845	May be involved in transcriptional regulation. {ECO:0000250}.	NA	zinc finger protein 845
ZSCAN12	-1.45	1	1.11	1	9753	ZSCAN12	NA	KIAA0426;ZNF29K1;ZFP96;dJ29K1.2;ZNF305;ZNF96	zinc finger and SCAN domain containing 12
NCAPH	-1.44	1	-2.38	0.321	23397	NCAPH	Regulatory subunit of the condensin complex, a complex required for conversion of interphase chromatin into mitotic-like condense chromosomes. The condensin complex probably introduces positive supercoils into relaxed DNA in the presence of type I topoisomerases and converts nicked DNA into positive knotted forms in the presence of type II topoisomerases. {ECO:0000269|PubMed:11136719}.	CAP-H;hCAP-H;BRRN1	non-SMC condensin I complex subunit H
HSPA12A	-1.44	1	-1.29	1	259217	HSPA12A	NA	FLJ13874;KIAA0417	heat shock protein family A (Hsp70) member 12A
OR52J3	-1.44	1	-1.25	1	119679	OR52J3	Odorant receptor. {ECO:0000305}.	NA	olfactory receptor family 52 subfamily J member 3
RGS16	-1.44	1	-1.02	1	6004	RGS16	Regulates G protein-coupled receptor signaling cascades. Inhibits signal transduction by increasing the GTPase activity of G protein alpha subunits, thereby driving them into their inactive GDP-bound form (PubMed:11602604, PubMed:18434541). Plays an important role in the phototransduction cascade by regulating the lifetime and effective concentration of activated transducin alpha. May regulate ex…	A28-RGS14;RGS-r	regulator of G protein signaling 16
ZNF114	-1.44	1	-0.97	1	163071	ZNF114	May be involved in transcriptional regulation.	MGC17986	zinc finger protein 114
KCNN1	-1.44	1	-0.68	1	3780	KCNN1	Forms a voltage-independent potassium channel activated by intracellular calcium. Activation is followed by membrane hyperpolarization. Thought to regulate neuronal excitability by contributing to the slow component of synaptic afterhyperpolarization. The channel is blocked by apamin (By similarity). {ECO:0000250}.	KCa2.1;hSK1	potassium calcium-activated channel subfamily N member 1
SUMO3	-1.44	1	-0.38	1	6612	SUMO3	Ubiquitin-like protein which can be covalently attached to target lysines either as a monomer or as a lysine-linked polymer. Does not seem to be involved in protein degradation and may function as an antagonist of ubiquitin in the degradation process. Plays a role in a number of cellular processes such as nuclear transport, DNA replication and repair, mitosis and signal transduction. Covalent att…	SMT3A;SMT3H1	small ubiquitin-like modifier 3
PMM1	-1.44	1	-0.09	1	5372	PMM1	Involved in the synthesis of the GDP-mannose and dolichol-phosphate-mannose required for a number of critical mannosyl transfer reactions. In addition, may be responsible for the degradation of glucose-1,6-bisphosphate in ischemic brain. {ECO:0000269|PubMed:16540464}.	Sec53	phosphomannomutase 1
RER1	-1.43	1	-1.08	1	11079	RER1	Involved in the retrieval of endoplasmic reticulum membrane proteins from the early Golgi compartment. {ECO:0000250}.	NA	retention in endoplasmic reticulum sorting receptor 1
OR52E4	-1.43	1	-0.66	1	390081	OR52E4	Odorant receptor. {ECO:0000305}.	NA	olfactory receptor family 52 subfamily E member 4
PARP1	-1.43	1	-0.62	1	142	PARP1	Involved in the base excision repair (BER) pathway, by catalyzing the poly(ADP-ribosyl)ation of a limited number of acceptor proteins involved in chromatin architecture and in DNA metabolism. This modification follows DNA damages and appears as an obligatory step in a detection/signaling pathway leading to the reparation of DNA strand breaks (PubMed:17177976, PubMed:18172500, PubMed:19344625, Pub…	PARP;PPOL;ADPRT	poly(ADP-ribose) polymerase 1
SLC45A4	-1.43	1	-0.55	1	57210	SLC45A4	NA	KIAA1126	solute carrier family 45 member 4
GMFB	-1.43	1	-0.53	1	2764	GMFB	This protein causes differentiation of brain cells, stimulation of neural regeneration, and inhibition of proliferation of tumor cells.	GMF	glia maturation factor beta
MORN2	-1.43	1	-0.2	1	729967	MORN2	Might have a role in spermatogenesis. {ECO:0000250|UniProtKB:Q6UL01}.	MOPT	MORN repeat containing 2
MRGPRF	-1.43	1	0.18	1	116535	MRGPRF	Orphan receptor. May bind to a neuropeptide and may regulate nociceptor function and/or development, including the sensation or modulation of pain (By similarity). {ECO:0000250}.	MGC21621;mrgF;GPR168;GPR140	MAS related GPR family member F
SLC25A41	-1.43	1	0.26	1	284427	SLC25A41	NA	FLJ40442;MGC34725;APC4	solute carrier family 25 member 41
CBX7	-1.42	1	-0.72	1	23492	CBX7	Component of a Polycomb group (PcG) multiprotein PRC1- like complex, a complex class required to maintain the transcriptionally repressive state of many genes, including Hox genes, throughout development. PcG PRC1 complex acts via chromatin remodeling and modification of histones; it mediates monoubiquitination of histone H2A 'Lys-119', rendering chromatin heritably changed in its expressibility.…	NA	chromobox 7
EMC6	-1.42	1	-0.71	1	83460	EMC6	NA	MGC2963;RAB5IFL;TMEM93	ER membrane protein complex subunit 6
SMG7	-1.42	1	-0.37	1	9887	SMG7	Plays a role in nonsense-mediated mRNA decay. Recruits UPF1 to cytoplasmic mRNA decay bodies. Together with SMG5 is thought to provide a link to the mRNA degradation machinery involving exonucleolytic pathways, and to serve as an adapter for UPF1 to protein phosphatase 2A (PP2A), thereby triggering UPF1 dephosphorylation. {ECO:0000269|PubMed:15546618, ECO:0000269|PubMed:15721257}.	KIAA0250;EST1C;SGA56M;SMG-7;C1orf16	SMG7, nonsense mediated mRNA decay factor
WDFY2	-1.42	1	-0.13	1	115825	WDFY2	Acts in an adapter protein-like fashion to mediate the interaction between the kinase PRKCZ and its substrate VAMP2 and increases the PRKCZ-dependent phosphorylation of VAMP2 (PubMed:17313651). Positively regulates adipocyte differentiation, by facilitating the phosphorylation and thus inactivation of the anti-adipogenetic transcription factor FOXO1 by the kinase AKT1 (PubMed:18388859). Plays a r…	ZFYVE22	WD repeat and FYVE domain containing 2
TUB	-1.42	1	-0.05	1	7275	TUB	Functions in signal transduction from heterotrimeric G protein-coupled receptors. Binds to membranes containing phosphatidylinositol 4,5-bisphosphate. Can bind DNA (in vitro). May contribute to the regulation of transcription in the nucleus. Could be involved in the hypothalamic regulation of body weight (By similarity). Contribute to stimulation of phagocytosis of apoptotic retinal pigment epith…	rd5	tubby bipartite transcription factor
IL2RG	-1.42	1	-0.02	1	3561	IL2RG	Common subunit for the receptors for a variety of interleukins.	CD132;SCIDX1;IMD4;CIDX	interleukin 2 receptor subunit gamma
STX16	-1.42	1	0.8	1	8675	STX16	SNARE involved in vesicular transport from the late endosomes to the trans-Golgi network. {ECO:0000269|PubMed:18195106}.	hsyn16;SYN16	syntaxin 16
RHOA	-1.41	1	-1.11	1	387	RHOA	Regulates a signal transduction pathway linking plasma membrane receptors to the assembly of focal adhesions and actin stress fibers. Involved in a microtubule-dependent signal that is required for the myosin contractile ring formation during cell cycle cytokinesis. Plays an essential role in cleavage furrow formation. Required for the apical junction formation of keratinocyte cell-cell adhesion.…	RhoA;Rho12;RHOH12;ARH12;ARHA	ras homolog family member A
ZNF280B	-1.41	1	-0.94	1	140883	ZNF280B	May function as a transcription factor.	5'OY11.1;ZNF632;ZNF279;SUHW2	zinc finger protein 280B
EIF5B	-1.41	1	-0.82	1	9669	EIF5B	Plays a role in translation initiation. Translational GTPase that catalyzes the joining of the 40S and 60S subunits to form the 80S initiation complex with the initiator methionine-tRNA in the P-site base paired to the start codon. GTP binding and hydrolysis induces conformational changes in the enzyme that renders it active for productive interactions with the ribosome. The release of the enzyme…	IF2;KIAA0741;DKFZp434I036;FLJ10524	eukaryotic translation initiation factor 5B
SECISBP2	-1.41	1	-0.71	1	79048	SECISBP2	Binds to the SECIS element in the 3'-UTR of some mRNAs encoding selenoproteins. Binding is stimulated by SELB.	SBP2	SECIS binding protein 2
STIM1	-1.41	1	-0.53	1	6786	STIM1	Plays a role in mediating store-operated Ca(2+) entry (SOCE), a Ca(2+) influx following depletion of intracellular Ca(2+) stores (PubMed:15866891, PubMed:16005298, PubMed:16208375, PubMed:16537481, PubMed:16733527, PubMed:16766533, PubMed:16807233, PubMed:18854159, PubMed:19249086, PubMed:22464749, PubMed:24069340, PubMed:24351972, PubMed:24591628, PubMed:26322679, PubMed:25326555, PubMed:2821992…	GOK;D11S4896E	stromal interaction molecule 1
KIAA1033	-1.41	1	-0.41	1	23325	WASHC4	Acts at least in part as component of the WASH core complex whose assembly at the surface of endosomes seems to inhibit WASH nucleation-promoting factor (NPF) activity in recruiting and activating the Arp2/3 complex to induce actin polymerization, and which is involved in the regulation of the fission of tubules that serve as transport intermediates during endosome sorting (PubMed:19922875, PubMe…	SWIP;KIAA1033	WASH complex subunit 4
MPO	-1.41	1	-0.34	1	4353	MPO	Part of the host defense system of polymorphonuclear leukocytes. It is responsible for microbicidal activity against a wide range of organisms. In the stimulated PMN, MPO catalyzes the production of hypohalous acids, primarily hypochlorous acid in physiologic situations, and other toxic intermediates that greatly enhance PMN microbicidal activity. {ECO:0000269|PubMed:9922160}.	NA	myeloperoxidase
ACBD3	-1.41	1	-0.32	1	64746	ACBD3	Involved in the maintenance of Golgi structure by interacting with giantin, affecting protein transport between the endoplasmic reticulum and Golgi (PubMed:11590181). Involved in hormone-induced steroid biosynthesis in testicular Leydig cells (By similarity). Recruits PI4KB to the Golgi apparatus membrane; enhances the enzyme activity of PI4KB activity via its membrane recruitment thereby increas…	GCP60;PAP7;GOLPH1;GOCAP1	acyl-CoA binding domain containing 3
SPICE1	-1.41	1	-0.13	1	152185	SPICE1	Regulator required for centriole duplication, for proper bipolar spindle formation and chromosome congression in mitosis. {ECO:0000269|PubMed:20736305}.	SPICE;CCDC52	spindle and centriole associated protein 1
ELL3	-1.41	1	0.11	1	80237	ELL3	NA	FLJ22637	elongation factor for RNA polymerase II 3
HMCN2	-1.41	1	0.4	1	256158	HMCN2	NA	DKFZp434P0216;FLJ23816	hemicentin 2
OAS3	-1.41	1	0.56	1	4940	OAS3	Interferon-induced, dsRNA-activated antiviral enzyme which plays a critical role in cellular innate antiviral response. In addition, it may also play a role in other cellular processes such as apoptosis, cell growth, differentiation and gene regulation. Synthesizes preferentially dimers of 2'-5'- oligoadenylates (2-5A) from ATP which then bind to the inactive monomeric form of ribonuclease L (RNa…	NA	2'-5'-oligoadenylate synthetase 3
PSTK	-1.4	1	-1.93	0.629	118672	PSTK	Specifically phosphorylates seryl-tRNA(Sec) to O- phosphoseryl-tRNA(Sec), an activated intermediate for selenocysteine biosynthesis. {ECO:0000250}.	MGC35392;C10orf89	phosphoseryl-tRNA kinase
VAMP2	-1.4	1	-0.9	1	6844	VAMP2	Involved in the targeting and/or fusion of transport vesicles to their target membrane. Modulates the gating characteristics of the delayed rectifier voltage-dependent potassium channel KCNB1. {ECO:0000250|UniProtKB:P63045}.	VAMP-2;SYB2	vesicle associated membrane protein 2
SENP6	-1.4	1	-0.63	1	26054	SENP6	Protease that deconjugates SUMO1, SUMO2 and SUMO3 from targeted proteins. Processes preferentially poly-SUMO2 and poly- SUMO3 chains, but does not efficiently process SUMO1, SUMO2 and SUMO3 precursors. Deconjugates SUMO1 from RXRA, leading to transcriptional activation. Involved in chromosome alignment and spindle assembly, by regulating the kinetochore CENPH-CENPI-CENPK complex. Desumoylates PML…	SUSP1;KIAA0797	SUMO specific peptidase 6
AGPS	-1.4	1	-0.44	1	8540	AGPS	Catalyzes the exchange of an acyl for a long-chain alkyl group and the formation of the ether bond in the biosynthesis of ether phospholipids. {ECO:0000250}.	ADHAPS;ADAS;ALDHPSY;ADPS;ADAP-S	alkylglycerone phosphate synthase
MTBP	-1.4	1	0.04	1	27085	MTBP	Inhibits cell migration in vitro and suppresses the invasive behavior of tumor cells (By similarity). May play a role in MDM2-dependent p53/TP53 homeostasis in unstressed cells. Inhibits autoubiquitination of MDM2, thereby enhancing MDM2 stability. This promotes MDM2-mediated ubiquitination of p53/TP53 and its subsequent degradation. {ECO:0000250, ECO:0000269|PubMed:15632057}.	NA	MDM2 binding protein
KDM5D	-1.4	1	0.39	1	8284	KDM5D	Histone demethylase that specifically demethylates 'Lys- 4' of histone H3, thereby playing a central role in histone code. Does not demethylate histone H3 'Lys-9', H3 'Lys-27', H3 'Lys-36', H3 'Lys-79' or H4 'Lys-20'. Demethylates trimethylated and dimethylated but not monomethylated H3 'Lys-4'. May play a role in spermatogenesis. Involved in transcriptional repression of diverse metastasis-assoc…	KIAA0234;HYA;HY;SMCY;JARID1D	lysine demethylase 5D
IRF2	-1.4	1	0.55	1	3660	IRF2	Specifically binds to the upstream regulatory region of type I IFN and IFN-inducible MHC class I genes (the interferon consensus sequence (ICS)) and represses those genes. Also acts as an activator for several genes including H4 and IL7. Constitutively binds to the ISRE promoter to activate IL7. Involved in cell cycle regulation through binding the site II (HiNF-M) promoter region of H4 and activ…	NA	interferon regulatory factor 2
HP1BP3	-1.39	1	-1.32	1	50809	HP1BP3	Component of heterochromatin that maintains heterochromatin integrity during G1/S progression and regulates the duration of G1 phase to critically influence cell proliferative capacity (PubMed:24830416). Mediates chromatin condensation during hypoxia, leading to increased tumor cell viability, radio-resistance, chemo-resistance and self- renewal(PubMed:25100860). {ECO:0000269|PubMed:24830416, ECO…	HP1-BP74	heterochromatin protein 1 binding protein 3
MAGEB4	-1.39	1	-1.21	1	4115	MAGEB4	NA	MGC33144;CT3.6	MAGE family member B4
GP1BA	-1.39	1	-1.14	1	2811	GP1BA	GP-Ib, a surface membrane protein of platelets, participates in the formation of platelet plugs by binding to the A1 domain of vWF, which is already bound to the subendothelium.	CD42b;GPIbalpha;GP1B	glycoprotein Ib platelet subunit alpha
ZW10	-1.39	1	-0.95	1	9183	ZW10	Essential component of the mitotic checkpoint, which prevents cells from prematurely exiting mitosis. Required for the assembly of the dynein-dynactin and MAD1-MAD2 complexes onto kinetochores. Its function related to the spindle assembly machinery is proposed to depend on its association in the mitotic RZZ complex (PubMed:11590237, PubMed:15485811, PubMed:15824131). Involved in regulation of mem…	KNTC1AP	zw10 kinetochore protein
ZSCAN5B	-1.39	1	-0.94	1	342933	ZSCAN5B	May be involved in transcriptional regulation. {ECO:0000250}.	ZNF495B;ZNF371	zinc finger and SCAN domain containing 5B
TAS2R50	-1.39	1	-0.88	1	259296	TAS2R50	Receptor that may play a role in the perception of bitterness and is gustducin-linked. May play a role in sensing the chemical composition of the gastrointestinal content. The activity of this receptor may stimulate alpha gustducin, mediate PLC-beta-2 activation and lead to the gating of TRPM5 (By similarity). {ECO:0000250}.	T2R51	taste 2 receptor member 50
FAM127A	-1.39	1	-0.47	1	8933	RTL8C	NA	Mart8;Mar8;MAR8C;SIRH5;CXX1;FAM127A	retrotransposon Gag like 8C
PRSS8	-1.39	1	-0.3	1	5652	PRSS8	Possesses a trypsin-like cleavage specificity with a preference for poly-basic substrates. Stimulates epithelial sodium channel (ENaC) activity through activating cleavage of the gamma subunits (SCNN1G). {ECO:0000269|PubMed:15246975, ECO:0000269|PubMed:15474520}.	NA	serine protease 8
SMARCD2	-1.39	1	-0.22	1	6603	SMARCD2	Involved in transcriptional activation and repression of select genes by chromatin remodeling (alteration of DNA-nucleosome topology). Component of SWI/SNF chromatin remodeling complexes that carry out key enzymatic activities, changing chromatin structure by altering DNA-histone contacts within a nucleosome in an ATP-dependent manner (PubMed:22952240, PubMed:26601204). Critical regulator of myel…	BAF60B;Rsc6p;CRACD2;PRO2451	SWI/SNF related, matrix associated, actin dependent regulator of chromatin, subfamily d, member 2
MPLKIP	-1.39	1	-0.11	1	136647	MPLKIP	May play a role in maintenance of cell cycle integrity by regulating mitosis or cytokinesis. {ECO:0000269|PubMed:17310276}.	ORF20;TTDN1;C7orf11	M-phase specific PLK1 interacting protein
RNFT2	-1.39	1	0.07	1	84900	RNFT2	NA	FLJ14627;TMEM118	ring finger protein, transmembrane 2
RBM39	-1.38	1	-1.88	1	9584	RBM39	Transcriptional coactivator for steroid nuclear receptors ESR1/ER-alpha and ESR2/ER-beta, and JUN/AP-1 (By similarity). May be involved in pre-mRNA splicing process. {ECO:0000250}.	CC1.3;HCC1;CAPER;fSAP59;CAPERalpha;RNPC2	RNA binding motif protein 39
PCNA	-1.38	1	-1.42	1	5111	PCNA	Auxiliary protein of DNA polymerase delta and is involved in the control of eukaryotic DNA replication by increasing the polymerase's processibility during elongation of the leading strand. Induces a robust stimulatory effect on the 3'- 5' exonuclease and 3'-phosphodiesterase, but not apurinic- apyrimidinic (AP) endonuclease, APEX2 activities. Has to be loaded onto DNA in order to be able to stim…	NA	proliferating cell nuclear antigen
TSC2	-1.38	1	-1.36	1	7249	TSC2	In complex with TSC1, this tumor suppressor inhibits the nutrient-mediated or growth factor-stimulated phosphorylation of S6K1 and EIF4EBP1 by negatively regulating mTORC1 signaling. Acts as a GTPase-activating protein (GAP) for the small GTPase RHEB, a direct activator of the protein kinase activity of mTORC1. May also play a role in microtubule-mediated protein transport. Also stimulates the in…	tuberin;LAM;PPP1R160;TSC4	TSC complex subunit 2
OR2AP1	-1.38	1	-0.38	1	121129	OR2AP1	Odorant receptor. {ECO:0000305}.	OR2AP1P	olfactory receptor family 2 subfamily AP member 1
ZDHHC24	-1.38	1	-0.21	1	254359	ZDHHC24	NA	NA	zinc finger DHHC-type containing 24
NSUN3	-1.38	1	-0.08	1	63899	NSUN3	Mitochondrial tRNA methyltransferase that mediates methylation of cytosine to 5-methylcytosine (m5C) at position 34 of mt-tRNA(Met) (PubMed:27497299, PubMed:27214402, PubMed:27356879). mt-tRNA(Met) methylation at cytosine(34) takes place at the wobble position of the anticodon and initiates the formation of 5-formylcytosine (f(5)c) at this position (PubMed:27497299, PubMed:27214402, PubMed:273568…	FLJ22609	NOP2/Sun RNA methyltransferase family member 3
HPGD	-1.38	1	0.1	1	3248	HPGD	Prostaglandin inactivation. Contributes to the regulation of events that are under the control of prostaglandin levels. Catalyzes the NAD-dependent dehydrogenation of lipoxin A4 to form 15-oxo-lipoxin A4. Inhibits in vivo proliferation of colon cancer cells. {ECO:0000269|PubMed:10837478, ECO:0000269|PubMed:15574495, ECO:0000269|PubMed:16828555}.	SDR36C1	15-hydroxyprostaglandin dehydrogenase
ELOVL1	-1.37	1	-1.45	1	64834	ELOVL1	Catalyzes the first and rate-limiting reaction of the four that constitute the long-chain fatty acids elongation cycle. This endoplasmic reticulum-bound enzymatic process, allows the addition of 2 carbons to the chain of long- and very long-chain fatty acids/VLCFAs per cycle. Condensing enzyme that exhibits activity toward saturated C18 to C26 acyl-CoA substrates, with the highest activity toward…	Ssc1	ELOVL fatty acid elongase 1
PSMA3	-1.37	1	-1.2	1	5684	PSMA3	Component of the 20S core proteasome complex involved in the proteolytic degradation of most intracellular proteins. This complex plays numerous essential roles within the cell by associating with different regulatory particles. Associated with two 19S regulatory particles, forms the 26S proteasome and thus participates in the ATP-dependent degradation of ubiquitinated proteins. The 26S proteasom…	HC8	proteasome subunit alpha 3
RPL36AL	-1.37	1	-0.13	1	6166	RPL36AL	NA	RPL36A	ribosomal protein L36a like
PACRGL	-1.37	1	0.08	1	133015	PACRGL	NA	MGC29898;C4orf28	parkin coregulated like
NPR2	-1.37	1	0.24	1	4882	NPR2	Receptor for the C-type natriuretic peptide NPPC/CNP hormone. Has guanylate cyclase activity upon binding of its ligand. May play a role in the regulation of skeletal growth. {ECO:0000269|PubMed:15146390, ECO:0000269|PubMed:1672777, ECO:0000269|PubMed:24001744, ECO:0000269|PubMed:24471569, ECO:0000269|PubMed:26980729}.	GUCY2B;ANPb;ANPRB;NPRB;AMDM	natriuretic peptide receptor 2
H2AFJ	-1.36	1	-1.38	1	55766	H2AFJ	Core component of nucleosome. Nucleosomes wrap and compact DNA into chromatin, limiting DNA accessibility to the cellular machineries which require DNA as a template. Histones thereby play a central role in transcription regulation, DNA repair, DNA replication and chromosomal stability. DNA accessibility is regulated via a complex set of post-translational modifications of histones, also called h…	FLJ10903;MGC921	H2A histone family member J
STMN1	-1.36	1	-0.67	1	3925	STMN1	Involved in the regulation of the microtubule (MT) filament system by destabilizing microtubules. Prevents assembly and promotes disassembly of microtubules. Phosphorylation at Ser- 16 may be required for axon formation during neurogenesis. Involved in the control of the learned and innate fear (By similarity). {ECO:0000250}.	SMN;OP18;PR22;PP19;PP17;Lag;FLJ32206;LAP18;C1orf215	stathmin 1
TPRA1	-1.36	1	-0.6	1	131601	TPRA1	NA	TPRA40;FLJ32197;TMEM227;GPR175	transmembrane protein adipocyte associated 1
DENND4B	-1.36	1	-0.57	1	9909	DENND4B	Guanine nucleotide exchange factor (GEF) which may activate RAB10. Promotes the exchange of GDP to GTP, converting inactive GDP-bound Rab proteins into their active GTP-bound form. {ECO:0000269|PubMed:20937701}.	KIAA0476	DENN domain containing 4B
DEFB135	-1.36	1	-0.37	1	613209	DEFB135	Has antibacterial activity. {ECO:0000305}.	NA	defensin beta 135
C1orf65	-1.36	1	-0.34	1	164127	CCDC185	NA	FLJ35728;C1orf65	coiled-coil domain containing 185
LRRC6	-1.36	1	-0.31	1	23639	LRRC6	May play a role in dynein arm assembly, hence essential for proper axoneme building for cilia motility. {ECO:0000269|PubMed:23122589}.	TSLRP;LRTP;CILD19	leucine rich repeat containing 6
INTS2	-1.36	1	0.06	1	57508	INTS2	Component of the Integrator (INT) complex, a complex involved in the small nuclear RNAs (snRNA) U1 and U2 transcription and in their 3'-box-dependent processing. The Integrator complex is associated with the C-terminal domain (CTD) of RNA polymerase II largest subunit (POLR2A) and is recruited to the U1 and U2 snRNAs genes (Probable). Mediates recruitment of cytoplasmic dynein to the nuclear enve…	INT2;KIAA1287	integrator complex subunit 2
UPF2	-1.36	1	1.03	1	26019	UPF2	Involved in nonsense-mediated decay (NMD) of mRNAs containing premature stop codons by associating with the nuclear exon junction complex (EJC). Recruited by UPF3B associated with the EJC core at the cytoplasmic side of the nuclear envelope and the subsequent formation of an UPF1-UPF2-UPF3 surveillance complex (including UPF1 bound to release factors at the stalled ribosome) is believed to activa…	RENT2;DKFZP434D222;KIAA1408;smg-3	UPF2, regulator of nonsense mediated mRNA decay
YLPM1	-1.35	1	-1.46	1	56252	YLPM1	Plays a role in the reduction of telomerase activity during differentiation of embryonic stem cells by binding to the core promoter of TERT and controlling its down-regulation. {ECO:0000250}.	ZAP;PPP1R169;C14orf170	YLP motif containing 1
COPE	-1.35	1	-1.12	1	11316	COPE	The coatomer is a cytosolic protein complex that binds to dilysine motifs and reversibly associates with Golgi non- clathrin-coated vesicles, which further mediate biosynthetic protein transport from the ER, via the Golgi up to the trans Golgi network. The coatomer complex is required for budding from Golgi membranes, and is essential for the retrograde Golgi-to-ER transport of dilysine-tagged pr…	epsilon-COP	coatomer protein complex subunit epsilon
ATP6AP1	-1.35	1	-0.84	1	537	ATP6AP1	Accessory subunit of the proton-transporting vacuolar (V)-ATPase protein pump, which is required for luminal acidification of secretory vesicles. Guides the V-type ATPase into specialized subcellular compartments, such as neuroendocrine regulated secretory vesicles or the ruffled border of the osteoclast, thereby regulating its activity. Involved in membrane trafficking and Ca(2+)-dependent membr…	ORF;XAP-3;VATPS1;16A;Ac45;XAP3;CF2;ATP6S1;ATP6IP1	ATPase H+ transporting accessory protein 1
PDGFA	-1.35	1	-0.6	1	5154	PDGFA	Growth factor that plays an essential role in the regulation of embryonic development, cell proliferation, cell migration, survival and chemotaxis. Potent mitogen for cells of mesenchymal origin. Required for normal lung alveolar septum formation during embryogenesis, normal development of the gastrointestinal tract, normal development of Leydig cells and spermatogenesis. Required for normal olig…	PDGF1;PDGF-A	platelet derived growth factor subunit A
MNT	-1.35	1	0.33	1	4335	MNT	Binds DNA as a heterodimer with MAX and represses transcription. Binds to the canonical E box sequence 5'-CACGTG-3' and, with higher affinity, to 5'-CACGCG-3'.	ROX;MXD6;MAD6;bHLHd3	MAX network transcriptional repressor
CNOT6	-1.35	1	0.51	1	57472	CNOT6	Poly(A) nuclease with 3'-5' RNase activity. Catalytic component of the CCR4-NOT complex which is one of the major cellular mRNA deadenylases and is linked to various cellular processes including bulk mRNA degradation, miRNA-mediated repression, translational repression during translational initiation and general transcription regulation. Additional complex functions may be a consequence of its in…	CCR4;KIAA1194;Ccr4a	CCR4-NOT transcription complex subunit 6
C15orf39	-1.35	1	1.02	1	56905	C15orf39	NA	DKFZP434H132;FLJ46337	chromosome 15 open reading frame 39
RNF32	-1.34	1	-2.43	0.243	140545	RNF32	May play a role in sperm formation. {ECO:0000269|PubMed:11890671}.	FKSG33;HSD15;LMBR2	ring finger protein 32
ZIC2	-1.34	1	-0.95	1	7546	ZIC2	Acts as a transcriptional activator or repressor. Plays important roles in the early stage of organogenesis of the CNS. Activates the transcription of the serotonin transporter SERT in uncrossed ipsilateral retinal ganglion cells (iRGCs) to refine eye-specific projections in primary visual targets. Its transcriptional activity is repressed by MDFIC. Involved in the formation of the ipsilateral re…	HPE5	Zic family member 2
ATG2B	-1.34	1	-0.94	1	55102	ATG2B	Required for both autophagosome formation and regulation of lipid droplet morphology and dispersion. {ECO:0000269|PubMed:22219374}.	FLJ10242;C14orf103	autophagy related 2B
CHMP5	-1.34	1	-0.74	1	51510	CHMP5	Probable peripherally associated component of the endosomal sorting required for transport complex III (ESCRT-III) which is involved in multivesicular bodies (MVBs) formation and sorting of endosomal cargo proteins into MVBs. MVBs contain intraluminal vesicles (ILVs) that are generated by invagination and scission from the limiting membrane of the endosome and mostly are delivered to lysosomes en…	HSPC177;CGI-34;Vps60;C9orf83;SNF7DC2	charged multivesicular body protein 5
RPS6KB2	-1.34	1	-0.38	1	6199	RPS6KB2	Phosphorylates specifically ribosomal protein S6.	p70S6Kb;P70-BETA;STK14B;KLS;S6KB;S6Kbeta;S6KŒ≤	ribosomal protein S6 kinase B2
TNFSF4	-1.34	1	-0.28	1	7292	TNFSF4	Cytokine that binds to TNFRSF4. Co-stimulates T-cell proliferation and cytokine production.	OX-40L;gp34;CD252;TXGP1	TNF superfamily member 4
ADAM12	-1.34	1	-0.19	1	8038	ADAM12	Involved in skeletal muscle regeneration, specifically at the onset of cell fusion. Also involved in macrophage-derived giant cells (MGC) and osteoclast formation from mononuclear precursors (By similarity). {ECO:0000250}.	MCMPMltna;MLTN	ADAM metallopeptidase domain 12
RYR1	-1.34	1	-0.17	1	6261	RYR1	Calcium channel that mediates the release of Ca(2+) from the sarcoplasmic reticulum into the cytoplasm and thereby plays a key role in triggering muscle contraction following depolarization of T-tubules (PubMed:11741831, PubMed:16163667). Repeated very high-level exercise increases the open probability of the channel and leads to Ca(2+) leaking into the cytoplasm (PubMed:18268335). Can also media…	RYR;PPP1R137;MHS;MHS1;CCO	ryanodine receptor 1
EMC7	-1.34	1	0.16	1	56851	EMC7	NA	C11orf3;C15orf24	ER membrane protein complex subunit 7
UBR4	-1.34	1	0.22	1	23352	UBR4	E3 ubiquitin-protein ligase which is a component of the N-end rule pathway. Recognizes and binds to proteins bearing specific N-terminal residues that are destabilizing according to the N-end rule, leading to their ubiquitination and subsequent degradation. Together with clathrin, forms meshwork structures involved in membrane morphogenesis and cytoskeletal organization. Regulates integrin-mediat…	KIAA1307;KIAA0462;RBAF600;ZUBR1	ubiquitin protein ligase E3 component n-recognin 4
ERBB2IP	-1.34	1	0.34	1	55914	ERBIN	Acts as an adapter for the receptor ERBB2, in epithelia. By binding the unphosphorylated 'Tyr-1248' of receptor ERBB2, it may contribute to stabilize this unphosphorylated state (PubMed:16203728). Inhibits NOD2-dependent NF-kappa-B signaling and proinflammatory cytokine secretion (PubMed:16203728). {ECO:0000269|PubMed:10878805, ECO:0000269|PubMed:16203728}.	LAP2;ERBB2IP	erbb2 interacting protein
HSPA13	-1.34	1	0.86	1	6782	HSPA13	Has peptide-independent ATPase activity.	STCH	heat shock protein family A (Hsp70) member 13
DGCR14	-1.33	1	-1.64	1	8220	ESS2	May be involved in pre-mRNA splicing. {ECO:0000250|UniProtKB:P34420}.	DGSI;Es2el;ES2;DGS-H;ESS-2;bis1;DGCR13;DGCR14	ess-2 splicing factor homolog
FAM216A	-1.33	1	-0.78	1	29902	FAM216A	NA	HSU79274;C12orf24	family with sequence similarity 216 member A
TNS4	-1.33	1	-0.7	1	84951	TNS4	May be involved in cell migration, cartilage development and in linking signal transduction pathways to the cytoskeleton (By similarity). May promote apoptosis, via its cleavage by caspase-3. {ECO:0000250}.	CTEN	tensin 4
TICAM1	-1.33	1	-0.56	1	148022	TICAM1	Involved in innate immunity against invading pathogens. Adapter used by TLR3 and TLR4 (through TICAM2) to mediate NF- kappa-B and interferon-regulatory factor (IRF) activation, and to induce apoptosis. Ligand binding to these receptors results in TRIF recruitment through its TIR domain. Distinct protein- interaction motifs allow recruitment of the effector proteins TBK1, TRAF6 and RIPK1, which in…	TRIF;TICAM-1;MGC35334;PRVTIRB	toll like receptor adaptor molecule 1
EBLN2	-1.33	1	-0.51	1	55096	EBLN2	May act as an RNA-binding protein. The C-terminal region is highly homologous to the bornavirus nucleocapsid N protein that binds viral RNA and oligomerizes. The viral protein also possesses a nuclear import and a nuclear export signal. These 2 signals seem absent in EBLN-2 supporting an unrelated function in Human.	NA	endogenous Bornavirus like nucleoprotein 2
KRTAP10-8	-1.33	1	-0.47	1	386681	KRTAP10-8	In the hair cortex, hair keratin intermediate filaments are embedded in an interfilamentous matrix, consisting of hair keratin-associated proteins (KRTAP), which are essential for the formation of a rigid and resistant hair shaft through their extensive disulfide bond cross-linking with abundant cysteine residues of hair keratins. The matrix proteins include the high- sulfur and high-glycine-tyro…	KRTAP18.8;KAP10.8;KRTAP18-8	keratin associated protein 10-8
ADAM15	-1.33	1	-0.24	1	8751	ADAM15	Active metalloproteinase with gelatinolytic and collagenolytic activity. Plays a role in the wound healing process. Mediates both heterotypic intraepithelial cell/T-cell interactions and homotypic T-cell aggregation. Inhibits beta-1 integrin-mediated cell adhesion and migration of airway smooth muscle cells. Suppresses cell motility on or towards fibronectin possibly by driving alpha-v/beta-1 int…	MDC15	ADAM metallopeptidase domain 15
DSG3	-1.33	1	0.01	1	1830	DSG3	Component of intercellular desmosome junctions. Involved in the interaction of plaque proteins and intermediate filaments mediating cell-cell adhesion.	CDHF6	desmoglein 3
VPS54	-1.32	1	-1.35	1	51542	VPS54	Acts as component of the GARP complex that is involved in retrograde transport from early and late endosomes to the trans-Golgi network (TGN). The GARP complex is required for the maintenance of the cycling of mannose 6-phosphate receptors between the TGN and endosomes, this cycling is necessary for proper lysosomal sorting of acid hydrolases such as CTSD (PubMed:18367545). Within the GARP comple…	HCC8;PPP1R164	VPS54, GARP complex subunit
ACYP2	-1.32	1	-1.19	1	98	ACYP2	Its physiological role is not yet clear.	NA	acylphosphatase 2
GOLGA6L3	-1.32	1	-0.95	1	100133220	NA	NA	NA	NA
VPS37D	-1.32	1	-0.49	1	155382	VPS37D	Component of the ESCRT-I complex, a regulator of vesicular trafficking process. Required for the sorting of endocytic ubiquitinated cargos into multivesicular bodies. May be involved in cell growth and differentiation.	MGC35352;WBSCR24	VPS37D, ESCRT-I subunit
UBALD1	-1.32	1	-0.47	1	124402	UBALD1	NA	FAM100A	UBA like domain containing 1
SH3GL3	-1.31	1	-1.36	1	6457	SH3GL3	Implicated in endocytosis. May recruit other proteins to membranes with high curvature (By similarity). {ECO:0000250}.	SH3D2C;SH3P13;CNSA3;EEN-B2;HsT19371	SH3 domain containing GRB2 like 3, endophilin A3
SLC9A1	-1.31	1	-1.16	1	6548	SLC9A1	Involved in pH regulation to eliminate acids generated by active metabolism or to counter adverse environmental conditions. Major proton extruding system driven by the inward sodium ion chemical gradient. Plays an important role in signal transduction. {ECO:0000269|PubMed:11350981, ECO:0000269|PubMed:15035633, ECO:0000269|PubMed:8901634}.	PPP1R143;APNH;NHE1	solute carrier family 9 member A1
CMTM6	-1.31	1	-1.03	1	54918	CMTM6	NA	FLJ20396;CKLFSF6	CKLF like MARVEL transmembrane domain containing 6
PVALB	-1.31	1	-0.99	1	5816	PVALB	In muscle, parvalbumin is thought to be involved in relaxation after contraction. It binds two calcium ions.	D22S749	parvalbumin
SOX2	-1.31	1	-0.95	1	6657	SOX2	Transcription factor that forms a trimeric complex with OCT4 on DNA and controls the expression of a number of genes involved in embryonic development such as YES1, FGF4, UTF1 and ZFP206 (By similarity). Critical for early embryogenesis and for embryonic stem cell pluripotency. May function as a switch in neuronal development. Downstream SRRT target that mediates the promotion of neural stem cell…	NA	SRY-box 2
MADD	-1.31	1	-0.79	1	8567	MADD	Plays a significant role in regulating cell proliferation, survival and death through alternative mRNA splicing. Isoform 5 shows increased cell proliferation and isoform 2 shows decreased. Converts GDP-bound inactive form of RAB3A, RAB3C and RAB3D to the GTP-bound active forms. Component of the TNFRSF1A signaling complex: MADD links TNFRSF1A with MAP kinase activation. Plays an important regulato…	DENN;KIAA0358;RAB3GEP	MAP kinase activating death domain
TTYH1	-1.31	1	-0.79	1	57348	TTYH1	Probable chloride channel. May be involved in cell adhesion (By similarity). {ECO:0000250}.	NA	tweety family member 1
DIMT1	-1.31	1	-0.62	1	27292	DIMT1	Specifically dimethylates two adjacent adenosines in the loop of a conserved hairpin near the 3'-end of 18S rRNA in the 40S particle (PubMed:25851604). Involved in the pre-rRNA processing steps leading to small-subunit rRNA production independently of its RNA-modifying catalytic activity (PubMed:25851604). {ECO:0000269|PubMed:25851604}.	HSA9761;DIMT1L	DIM1 dimethyladenosine transferase 1 homolog
INPP5B	-1.31	1	-0.6	1	3633	INPP5B	Hydrolyzes phosphatidylinositol 4,5-bisphosphate (PtIns(4,5)P2) and the signaling molecule phosphatidylinositol 1,4,5-trisphosphate (PtIns(1,4,5)P3), and thereby modulates cellular signaling events. {ECO:0000269|PubMed:7721860}.	NA	inositol polyphosphate-5-phosphatase B
LATS1	-1.31	1	-0.57	1	9113	LATS1	Negative regulator of YAP1 in the Hippo signaling pathway that plays a pivotal role in organ size control and tumor suppression by restricting proliferation and promoting apoptosis. The core of this pathway is composed of a kinase cascade wherein STK3/MST2 and STK4/MST1, in complex with its regulatory protein SAV1, phosphorylates and activates LATS1/2 in complex with its regulatory protein MOB1, …	WARTS	large tumor suppressor kinase 1
RPS25	-1.31	1	-0.5	1	6230	RPS25	NA	S25	ribosomal protein S25
MLX	-1.31	1	-0.47	1	6945	MLX	Transcription regulator. Forms a sequence-specific DNA- binding protein complex with MAD1, MAD4, MNT, WBSCR14 and MLXIP which recognizes the core sequence 5'-CACGTG-3'. The TCFL4-MAD1, TCFL4-MAD4, TCFL4-WBSCR14 complexes are transcriptional repressors. Plays a role in transcriptional activation of glycolytic target genes. Involved in glucose-responsive gene regulation. {ECO:0000269|PubMed:1059392…	MAD7;MXD7;bHLHd13;TCFL4	MLX, MAX dimerization protein
DPCD	-1.31	1	-0.42	1	25911	DPCD	May play a role in the formation or function of ciliated cells. {ECO:0000269|PubMed:14630615}.	DKFZP566F084;RP11-529I10.4	deleted in primary ciliary dyskinesia homolog (mouse)
FAM194A	-1.31	1	-0.41	1	131831	ERICH6	NA	MGC39662;ERICH6A;C3orf44;FAM194A	glutamate rich 6
EIF4B	-1.31	1	-0.25	1	1975	EIF4B	Required for the binding of mRNA to ribosomes. Functions in close association with EIF4-F and EIF4-A. Binds near the 5'- terminal cap of mRNA in presence of EIF-4F and ATP. Promotes the ATPase activity and the ATP-dependent RNA unwinding activity of both EIF4-A and EIF4-F.	NA	eukaryotic translation initiation factor 4B
PPY	-1.31	1	-0.09	1	5539	PPY	Pancreatic hormone is synthesized in pancreatic islets of Langerhans and acts as a regulator of pancreatic and gastrointestinal functions.	PNP	pancreatic polypeptide
TMEM198	-1.31	1	0.09	1	130612	TMEM198	Promotes LRP6 phosphorylation by casein kinases and thereby plays a role in Wnt signaling. May be a membrane scaffold protein involved in the self-aggregation of LRP6 to further enhance its activity. {ECO:0000269|PubMed:21536646}.	MGC99813;TMEM198A	transmembrane protein 198
NUDT22	-1.31	1	0.1	1	84304	NUDT22	NA	MGC13045	nudix hydrolase 22
H2BFWT	-1.31	1	0.43	1	158983	H2BFWT	Atypical histone H2B. Nucleosomes containing it are structurally and dynamically indistinguishable from those containing conventional H2B. However, unlike conventional H2B, does not recruit chromosome condensation factors and does not participate in the assembly of mitotic chromosomes. May be important for telomere function. {ECO:0000269|PubMed:16449661}.	NA	H2B histone family member W, testis specific
SYVN1	-1.31	1	0.44	1	84447	SYVN1	Acts as an E3 ubiquitin-protein ligase which accepts ubiquitin specifically from endoplasmic reticulum-associated UBC7 E2 ligase and transfers it to substrates, promoting their degradation (PubMed:12459480, PubMed:12646171, PubMed:12975321, PubMed:14593114, PubMed:16289116, PubMed:16847254, PubMed:17059562, PubMed:17141218, PubMed:17170702, PubMed:22607976, PubMed:26471130). Component of the endo…	HRD1;DER3	synoviolin 1
HGS	-1.3	1	-1.32	1	9146	HGS	Involved in intracellular signal transduction mediated by cytokines and growth factors. When associated with STAM, it suppresses DNA signaling upon stimulation by IL-2 and GM-CSF. Could be a direct effector of PI3-kinase in vesicular pathway via early endosomes and may regulate trafficking to early and late endosomes by recruiting clathrin. May concentrate ubiquitinated receptors within clathrin-…	Hrs;ZFYVE8;Vps27	hepatocyte growth factor-regulated tyrosine kinase substrate
GABRB1	-1.3	1	-1.16	1	2560	GABRB1	Component of the heteropentameric receptor for GABA, the major inhibitory neurotransmitter in the vertebrate brain. Functions also as histamine receptor and mediates cellular responses to histamine. Functions as receptor for diazepines and various anesthetics, such as pentobarbital; these are bound at a separate allosteric effector binding site. Functions as ligand- gated chloride channel. {ECO:0…	NA	gamma-aminobutyric acid type A receptor beta1 subunit
ZNF681	-1.3	1	-0.71	1	148213	ZNF681	May be involved in transcriptional regulation. {ECO:0000250}.	FLJ31526	zinc finger protein 681
OR9A2	-1.3	1	-0.68	1	135924	OR9A2	Odorant receptor. {ECO:0000305}.	NA	olfactory receptor family 9 subfamily A member 2
PSMD13	-1.3	1	-0.28	1	5719	PSMD13	Component of the 26S proteasome, a multiprotein complex involved in the ATP-dependent degradation of ubiquitinated proteins. This complex plays a key role in the maintenance of protein homeostasis by removing misfolded or damaged proteins, which could impair cellular functions, and by removing proteins whose functions are no longer required. Therefore, the proteasome participates in numerous cell…	p40.5;Rpn9	proteasome 26S subunit, non-ATPase 13
CMPK2	-1.3	1	-0.14	1	129607	CMPK2	May participate in dUTP and dCTP synthesis in mitochondria. Is able to phosphorylate dUMP, dCMP, CMP, UMP and monophosphates of the pyrimidine nucleoside analogs ddC, dFdC, araC, BVDU and FdUrd with ATP as phosphate donor. Efficacy is highest for dUMP followed by dCMP; CMP and UMP are poor substrates. May be involved in mtDNA depletion caused by long term treatment with ddC or other pyrimidine an…	TYKi;UMP-CMPK2;NDK	cytidine/uridine monophosphate kinase 2
CDC7	-1.3	1	0.13	1	8317	CDC7	Seems to phosphorylate critical substrates that regulate the G1/S phase transition and/or DNA replication. Can phosphorylates MCM2 and MCM3. {ECO:0000269|PubMed:12065429}.	Hsk1;huCdc7;HsCdc7;CDC7L1	cell division cycle 7
CIZ1	-1.3	1	0.16	1	25792	CIZ1	May regulate the subcellular localization of CIP/WAF1.	LSFR1;ZNF356	CDKN1A interacting zinc finger protein 1
SH2D4A	-1.3	1	0.21	1	63898	SH2D4A	Inhibits estrogen-induced cell proliferation by competing with PLCG for binding to ESR1, blocking the effect of estrogen on PLCG and repressing estrogen-induced proliferation. May play a role in T-cell development and function. {ECO:0000269|PubMed:18641339, ECO:0000269|PubMed:19712589}.	FLJ20967;SH2A;PPP1R38	SH2 domain containing 4A
XPO1	-1.29	1	-2.72	0.443	7514	XPO1	Mediates the nuclear export of cellular proteins (cargos) bearing a leucine-rich nuclear export signal (NES) and of RNAs. In the nucleus, in association with RANBP3, binds cooperatively to the NES on its target protein and to the GTPase RAN in its active GTP-bound form (Ran-GTP). Docking of this complex to the nuclear pore complex (NPC) is mediated through binding to nucleoporins. Upon transit of…	CRM1;emb	exportin 1
ANKK1	-1.29	1	-1.66	1	255239	ANKK1	NA	X-kinase	ankyrin repeat and kinase domain containing 1
RSL24D1	-1.29	1	-1.18	1	51187	RSL24D1	Involved in the biogenesis of the 60S ribosomal subunit. Ensures the docking of GTPBP4/NOG1 to pre-60S particles (By similarity). {ECO:0000250}.	HRP-L30-iso;L30;RPL24L;RPL24;C15orf15	ribosomal L24 domain containing 1
RPL18A	-1.29	1	-1.12	1	6142	RPL18A	NA	L18A	ribosomal protein L18a
SPATA31C1	-1.29	1	-1.04	1	441452	NA	May play a role in spermatogenesis. {ECO:0000250}.	NA	NA
HLA-DQB2	-1.29	1	-0.76	1	3120	HLA-DQB2	Binds peptides derived from antigens that access the endocytic route of antigen presenting cells (APC) and presents them on the cell surface for recognition by the CD4 T-cells. The peptide binding cleft accommodates peptides of 10-30 residues. The peptides presented by MHC class II molecules are generated mostly by degradation of proteins that access the endocytic route, where they are processed …	HLA-DXB	major histocompatibility complex, class II, DQ beta 2
NCKAP1	-1.29	1	-0.72	1	10787	NCKAP1	Part of the WAVE complex that regulates lamellipodia formation. The WAVE complex regulates actin filament reorganization via its interaction with the Arp2/3 complex. Actin remodeling activity is regulated by RAC1. As component of the WAVE1 complex, required for BDNF-NTRK2 endocytic trafficking and signaling from early endosomes. {ECO:0000250|UniProtKB:P28660}.	Nap1;HEM2;NAP125	NCK associated protein 1
VTA1	-1.29	1	-0.57	1	51534	VTA1	Involved in the endosomal multivesicular bodies (MVB) pathway. MVBs contain intraluminal vesicles (ILVs) that are generated by invagination and scission from the limiting membrane of the endosome and mostly are delivered to lysosomes enabling degradation of membrane proteins, such as stimulated growth factor receptors, lysosomal enzymes and lipids. Thought to be a cofactor of VPS4A/B, which catal…	HSPC228;My012;C6orf55	vesicle trafficking 1
ST13	-1.29	1	-0.31	1	6767	ST13	One HIP oligomer binds the ATPase domains of at least two HSC70 molecules dependent on activation of the HSC70 ATPase by HSP40. Stabilizes the ADP state of HSC70 that has a high affinity for substrate protein. Through its own chaperone activity, it may contribute to the interaction of HSC70 with various target proteins (By similarity). {ECO:0000250}.	SNC6;HSPABP1;HIP;P48;FAM10A1	ST13, Hsp70 interacting protein
TMEM117	-1.29	1	0.07	1	84216	TMEM117	Involved in endoplasmic reticulum (ER) stress-induced cell death pathway. {ECO:0000269|PubMed:28285135}.	DKFZp434K2435	transmembrane protein 117
WDR88	-1.29	1	0.85	1	126248	WDR88	NA	PQWD	WD repeat domain 88
EPS8L3	-1.28	1	-1.59	1	79574	EPS8L3	NA	FLJ21522;MGC16817	EPS8 like 3
HS3ST3A1	-1.28	1	-0.85	1	9955	HS3ST3A1	Sulfotransferase that utilizes 3'-phospho-5'-adenylyl sulfate (PAPS) to catalyze the transfer of a sulfo group to an N- unsubstituted glucosamine linked to a 2-O-sulfo iduronic acid unit on heparan sulfate. Catalyzes the O-sulfation of glucosamine in IdoUA2S-GlcNS and also in IdoUA2S-GlcNH2. The substrate-specific O-sulfation generates an enzyme-modified heparan sulfate which acts as a binding re…	3OST3A1;30ST3A1	heparan sulfate-glucosamine 3-sulfotransferase 3A1
RNGTT	-1.28	1	-0.5	1	8732	RNGTT	Bifunctional mRNA-capping enzyme exhibiting RNA 5'- triphosphatase activity in the N-terminal part and mRNA guanylyltransferase activity in the C-terminal part. Catalyzes the first two steps of cap formation: by removing the gamma-phosphate from the 5'-triphosphate end of nascent mRNA to yield a diphosphate end, and by transferring the gmp moiety of GTP to the 5'-diphosphate terminus. {ECO:000026…	HCE;HCE1;hCAP	RNA guanylyltransferase and 5'-phosphatase
MPDZ	-1.28	1	-0.38	1	8777	MPDZ	Interacts with HTR2C and provokes its clustering at the cell surface (By similarity). Member of the NMDAR signaling complex that may play a role in control of AMPAR potentiation and synaptic plasticity in excitatory synapses. {ECO:0000250, ECO:0000269|PubMed:11150294, ECO:0000269|PubMed:15312654}.	MUPP1	multiple PDZ domain crumbs cell polarity complex component
SF3B3	-1.28	1	-0.36	1	23450	SF3B3	Involved in pre-mRNA splicing as a component of the splicing factor SF3B complex (PubMed:27720643). SF3B complex is required for 'A' complex assembly formed by the stable binding of U2 snRNP to the branchpoint sequence (BPS) in pre-mRNA. Sequence independent binding of SF3A/SF3B complex upstream of the branch site is essential, it may anchor U2 snRNP to the pre-mRNA (PubMed:12234937). May also be…	SAP130;SF3b130;RSE1;KIAA0017	splicing factor 3b subunit 3
LAMC2	-1.28	1	-0.34	1	3918	LAMC2	Binding to cells via a high affinity receptor, laminin is thought to mediate the attachment, migration and organization of cells into tissues during embryonic development by interacting with other extracellular matrix components. Ladsin exerts cell- scattering activity toward a wide variety of cells, including epithelial, endothelial, and fibroblastic cells. {ECO:0000269|PubMed:8265624}.	nicein-100kDa;kalinin-105kDa;BM600-100kDa;EBR2;LAMB2T;LAMNB2;EBR2A	laminin subunit gamma 2
SLC22A12	-1.28	1	-0.05	1	116085	SLC22A12	Required for efficient urate re-absorption in the kidney. Regulates blood urate levels. Mediates saturable urate uptake by facilitating the exchange of urate against organic anions. {ECO:0000269|PubMed:12024214}.	OAT4L;RST;URAT1	solute carrier family 22 member 12
FBXL6	-1.28	1	0.07	1	26233	FBXL6	Substrate-recognition component of the SCF (SKP1-CUL1-F- box protein)-type E3 ubiquitin ligase complex. {ECO:0000250}.	FBL6	F-box and leucine rich repeat protein 6
MYLK	-1.28	1	0.35	1	4638	MYLK	Calcium/calmodulin-dependent myosin light chain kinase implicated in smooth muscle contraction via phosphorylation of myosin light chains (MLC). Also regulates actin-myosin interaction through a non-kinase activity. Phosphorylates PTK2B/PYK2 and myosin light-chains. Involved in the inflammatory response (e.g. apoptosis, vascular permeability, leukocyte diapedesis), cell motility and morphology, a…	MLCK;smMLCK;MYLK1;MLCK1	myosin light chain kinase
RPL14	-1.28	1	1.18	1	9045	RPL14	Component of the large ribosomal subunit. {ECO:0000305|PubMed:12962325}.	L14;hRL14;RL14;CTG-B33	ribosomal protein L14
PSMD3	-1.28	1	1.76	1	5709	PSMD3	Component of the 26S proteasome, a multiprotein complex involved in the ATP-dependent degradation of ubiquitinated proteins. This complex plays a key role in the maintenance of protein homeostasis by removing misfolded or damaged proteins, which could impair cellular functions, and by removing proteins whose functions are no longer required. Therefore, the proteasome participates in numerous cell…	S3;P58;Rpn3;TSTA2	proteasome 26S subunit, non-ATPase 3
POLD2	-1.27	1	-2.08	0.985	5425	POLD2	As a component of the trimeric and tetrameric DNA polymerase delta complexes (Pol-delta3 and Pol-delta4, respectively), plays a role in high fidelity genome replication, including in lagging strand synthesis, and repair (PubMed:12403614, PubMed:16510448, PubMed:19074196, PubMed:20334433, PubMed:24035200). Pol-delta3 and Pol-delta4 are characterized by the absence or the presence of POLD4. They ex…	NA	DNA polymerase delta 2, accessory subunit
EMX1	-1.27	1	-0.92	1	2016	EMX1	Transcription factor, which in cooperation with EMX2, acts to generate the boundary between the roof and archipallium in the developing brain. May function in combinations with OTX1/2 to specify cell fates in the developing central nervous system.	NA	empty spiracles homeobox 1
PRKD1	-1.27	1	-0.24	1	5587	PRKD1	Serine/threonine-protein kinase that converts transient diacylglycerol (DAG) signals into prolonged physiological effects downstream of PKC, and is involved in the regulation of MAPK8/JNK1 and Ras signaling, Golgi membrane integrity and trafficking, cell survival through NF-kappa-B activation, cell migration, cell differentiation by mediating HDAC7 nuclear export, cell proliferation via MAPK1/3 (…	PKCM;PKD;PKC-mu;PRKCM	protein kinase D1
TCF7L1	-1.27	1	0.24	1	83439	TCF7L1	Participates in the Wnt signaling pathway. Binds to DNA and acts as a repressor in the absence of CTNNB1, and as an activator in its presence. Necessary for the terminal differentiation of epidermal cells, the formation of keratohyalin granules and the development of the barrier function of the epidermis (By similarity). Down-regulates NQO1, leading to increased mitomycin c resistance. {ECO:00002…	TCF3	transcription factor 7 like 1
LIN7C	-1.27	1	0.39	1	55327	LIN7C	Plays a role in establishing and maintaining the asymmetric distribution of channels and receptors at the plasma membrane of polarized cells. Forms membrane-associated multiprotein complexes that may regulate delivery and recycling of proteins to the correct membrane domains. The tripartite complex composed of LIN7 (LIN7A, LIN7B or LIN7C), CASK and APBA1 may have the potential to couple synaptic …	MALS-3;Lin7c;LIN-7C;LIN-7-C;VELI3;FLJ11215	lin-7 homolog C, crumbs cell polarity complex component
CIB4	-1.27	1	0.39	1	130106	CIB4	NA	NA	calcium and integrin binding family member 4
WNK1	-1.27	1	0.8	1	65125	WNK1	NA	HSAN2;PPP1R167;PRKWNK1;HSN2	WNK lysine deficient protein kinase 1
TRAPPC3	-1.27	1	0.96	1	27095	TRAPPC3	May play a role in vesicular transport from endoplasmic reticulum to Golgi.	BET3	trafficking protein particle complex 3
AGPAT6	-1.26	1	-1.73	0.967	137964	GPAT4	Esterifies acyl-group from acyl-ACP to the sn-1 position of glycerol-3-phosphate, an essential step in glycerolipid biosynthesis. Active against both saturated and unsaturated long- chain fatty acyl-CoAs. {ECO:0000269|PubMed:18238778}.	DKFZp586M1819;LPAAT-zeta;TSARG7;AGPAT6	glycerol-3-phosphate acyltransferase 4
FAM160B2	-1.26	1	-1.14	1	64760	FAM160B2	NA	FLJ21801;RAI16	family with sequence similarity 160 member B2
NOTCH2NL	-1.26	1	-1.11	1	388677	NOTCH2NLA	May function in the Notch signaling pathway and regulate neutrophil differentiation. {ECO:0000269|PubMed:14673143}.	N2N;NOTCH2NL	notch 2 N-terminal like A
OR1B1	-1.26	1	-0.99	1	347169	OR1B1	Odorant receptor. {ECO:0000305}.	OR9-B	olfactory receptor family 1 subfamily B member 1 (gene/pseudogene)
ZIC4	-1.26	1	-0.77	1	84107	ZIC4	Binds to DNA. {ECO:0000250}.	NA	Zic family member 4
PYCRL	-1.26	1	-0.65	1	65263	PYCR3	Enzyme that catalyzes the last step in proline biosynthesis. Proline is synthesized from either glutamate or ornithine; both are converted to pyrroline-5-carboxylate (P5C), and then to proline via pyrroline-5-carboxylate reductases (PYCRs). PYCRL is exclusively linked to the conversion of ornithine to proline. {ECO:0000269|PubMed:23024808}.	FLJ13852;PYCRL	pyrroline-5-carboxylate reductase 3
TRIP13	-1.26	1	-0.48	1	9319	TRIP13	Plays a key role in chromosome recombination and chromosome structure development during meiosis. Required at early steps in meiotic recombination that leads to non-crossovers pathways. Also needed for efficient completion of homologous synapsis by influencing crossover distribution along the chromosomes affecting both crossovers and non-crossovers pathways. Also required for development of highe…	16E1BP	thyroid hormone receptor interactor 13
TP53INP1	-1.26	1	-0.32	1	94241	TP53INP1	Antiproliferative and proapoptotic protein involved in cell stress response which acts as a dual regulator of transcription and autophagy. Acts as a positive regulator of autophagy. In response to cellular stress or activation of autophagy, relocates to autophagosomes where it interacts with autophagosome-associated proteins GABARAP, GABARAPL1/L2, MAP1LC3A/B/C and regulates autophagy. Acts as an …	DKFZp434M1317;FLJ22139;P53DINP1;SIP;TP53INP1A;TP53INP1B;Teap	tumor protein p53 inducible nuclear protein 1
NAA15	-1.26	1	-0.18	1	80155	NAA15	Auxillary subunit of the N-terminal acetyltransferase A (NatA) complex which displays alpha (N-terminal) acetyltransferase activity. The NAT activity may be important for vascular, hematopoietic and neuronal growth and development. Required to control retinal neovascularization in adult ocular endothelial cells. In complex with XRCC6 and XRCC5 (Ku80), up-regulates transcription from the osteocalc…	TBDN100;NATH;FLJ13340;NARG1	N(alpha)-acetyltransferase 15, NatA auxiliary subunit
VPS37A	-1.26	1	-0.11	1	137492	VPS37A	Component of the ESCRT-I complex, a regulator of vesicular trafficking process. Required for the sorting of endocytic ubiquitinated cargos into multivesicular bodies. May be involved in cell growth and differentiation. {ECO:0000269|PubMed:15240819}.	FLJ32642;HCRP1;SPG53;PQBP2	VPS37A, ESCRT-I subunit
WWC2	-1.26	1	0.05	1	80014	WWC2	NA	BOMB;FLJ22029	WW and C2 domain containing 2
CBLC	-1.26	1	0.05	1	23624	CBLC	Acts as an E3 ubiquitin-protein ligase, which accepts ubiquitin from specific E2 ubiquitin-conjugating enzymes, and then transfers it to substrates promoting their degradation by the proteasome. Functionally coupled with the E2 ubiquitin-protein ligases UB2D1, UB2D2 and UB2D3. Regulator of EGFR mediated signal transduction; upon EGF activation, ubiquitinates EGFR. Isoform 1, but not isoform 2, in…	CBL-3;CBL-SL;RNF57	Cbl proto-oncogene C
MAPK10	-1.26	1	0.2	1	5602	MAPK10	Serine/threonine-protein kinase involved in various processes such as neuronal proliferation, differentiation, migration and programmed cell death. Extracellular stimuli such as proinflammatory cytokines or physical stress stimulate the stress- activated protein kinase/c-Jun N-terminal kinase (SAP/JNK) signaling pathway. In this cascade, two dual specificity kinases MAP2K4/MKK4 and MAP2K7/MKK7 ph…	JNK3;p493F12;p54bSAPK;PRKM10	mitogen-activated protein kinase 10
ANGPT2	-1.26	1	0.25	1	285	ANGPT2	Binds to TEK/TIE2, competing for the ANGPT1 binding site, and modulating ANGPT1 signaling. Can induce tyrosine phosphorylation of TEK/TIE2 in the absence of ANGPT1. In the absence of angiogenic inducers, such as VEGF, ANGPT2-mediated loosening of cell-matrix contacts may induce endothelial cell apoptosis with consequent vascular regression. In concert with VEGF, it may facilitate endothelial cell…	Ang2	angiopoietin 2
CRNN	-1.26	1	0.36	1	49860	CRNN	Survival factor that participates in the clonogenicity of squamous esophageal epithelium cell lines, attenuates deoxycholic acid (DCA)-induced apoptotic cell death and release of calcium. When overexpressed in oral squamous carcinom cell lines, regulates negatively cell proliferation by the induction of G1 arrest. {ECO:0000269|PubMed:15896671, ECO:0000269|PubMed:16640557}.	SEP53;C1orf10	cornulin
BRIX1	-1.26	1	0.63	1	55299	BRIX1	Required for biogenesis of the 60S ribosomal subunit.	BRIX;FLJ11100;BXDC2	BRX1, biogenesis of ribosomes
MAP1B	-1.25	1	-1.38	1	4131	MAP1B	Facilitates tyrosination of alpha-tubulin in neuronal microtubules (By similarity). Phosphorylated MAP1B may play a role in the cytoskeletal changes that accompany neurite extension. Possibly MAP1B binds to at least two tubulin subunits in the polymer, and this bridging of subunits might be involved in nucleating microtubule polymerization and in stabilizing microtubules. Acts as a positive cofac…	MAP5;PPP1R102	microtubule associated protein 1B
KLHL30	-1.25	1	-1.29	1	377007	KLHL30	NA	FLJ43374	kelch like family member 30
SHOC2	-1.25	1	-1.14	1	8036	SHOC2	Regulatory subunit of protein phosphatase 1 (PP1c) that acts as a M-Ras/MRAS effector and participates in MAPK pathway activation. Upon M-Ras/MRAS activation, targets PP1c to specifically dephosphorylate the 'Ser-259' inhibitory site of RAF1 kinase and stimulate RAF1 activity at specialized signaling complexes. {ECO:0000269|PubMed:10783161, ECO:0000269|PubMed:16630891, ECO:0000269|PubMed:25137548…	KIAA0862;SOC2;SUR-8;SOC-2;SUR8	SHOC2, leucine rich repeat scaffold protein
ACAN	-1.25	1	-0.99	1	176	ACAN	NA	CSPGCP;MSK16;CSPG1;AGC1	aggrecan
NLRP9	-1.25	1	-0.98	1	338321	NLRP9	As the sensor component of the NLRP9 inflammasome, plays a crucial role in innate immunity and inflammation. In response to pathogens, including rotavirus, initiates the formation of the inflammasome polymeric complex, made of NLRP9, PYCARD and CASP1. Recruitment of proCASP1 to the inflammasome promotes its activation and CASP1-catalyzed IL1B and IL18 maturation and release in the extracellular m…	NOD6;PAN12;CLR19.1;NALP9	NLR family pyrin domain containing 9
GEM	-1.25	1	-0.93	1	2669	GEM	Could be a regulatory protein, possibly participating in receptor-mediated signal transduction at the plasma membrane. Has guanine nucleotide-binding activity but undetectable intrinsic GTPase activity.	KIR	GTP binding protein overexpressed in skeletal muscle
ING5	-1.25	1	-0.78	1	84289	ING5	Component of the HBO1 complex which has a histone H4- specific acetyltransferase activity, a reduced activity toward histone H3 and is responsible for the bulk of histone H4 acetylation in vivo. Component of the MOZ/MORF complex which has a histone H3 acetyltransferase activity. Through chromatin acetylation it may regulate DNA replication and may function as a transcriptional coactivator. {ECO:0…	FLJ23842;p28ING5	inhibitor of growth family member 5
POLR2M	-1.25	1	-0.56	1	81488	POLR2M	Plays a role in cellular signaling via Rho-related GTP- binding proteins and subsequent activation of transcription factor SRF (By similarity). Targets TJP1 to cell junctions. In cortical neurons, may play a role in glutaminergic signal transduction through interaction with the NMDA receptor subunit GRIN1 (By similarity). {ECO:0000250}.	Gdown;Gdown1;GCOM1;GRINL1A	RNA polymerase II subunit M
WBP2	-1.25	1	-0.53	1	23558	WBP2	Acts as transcriptional coactivator of estrogen and progesterone receptors (ESR1 and PGR) upon hormone activation (PubMed:16772533). In presence of estrogen, binds to ESR1- responsive promoters (PubMed:16772533). Required for YAP1 coactivation function on PGR activity (PubMed:16772533). Synergizes with WBP2 in enhancing PGR activity (PubMed:16772533). Modulates expression of post-synaptic scaffol…	WBP-2;GRAMD6	WW domain binding protein 2
CYP20A1	-1.25	1	-0.26	1	57404	CYP20A1	NA	CYP-M	cytochrome P450 family 20 subfamily A member 1
UBB	-1.25	1	-0.2	1	7314	UBB	Ubiquitin: Exists either covalently attached to another protein, or free (unanchored). When covalently bound, it is conjugated to target proteins via an isopeptide bond either as a monomer (monoubiquitin), a polymer linked via different Lys residues of the ubiquitin (polyubiquitin chains) or a linear polymer linked via the initiator Met of the ubiquitin (linear polyubiquitin chains). Polyubiquiti…	MGC8385;FLJ25987	ubiquitin B
SOX12	-1.25	1	-0.16	1	6666	SOX12	Binds to the sequence 5'-AACAAT-3'. {ECO:0000250}.	SOX22	SRY-box 12
SHCBP1	-1.25	1	0	1	79801	SHCBP1	May play a role in signaling pathways governing cellular proliferation, cell growth and differentiation. May be a component of a novel signaling pathway downstream of Shc. Acts as a positive regulator of FGF signaling in neural progenitor cells. {ECO:0000250|UniProtKB:Q9Z179}.	FLJ22009;PAL	SHC binding and spindle associated 1
RFFL	-1.25	1	0	1	117584	RFFL	E3 ubiquitin-protein ligase that regulates several biological processes through the ubiquitin-mediated proteasomal degradation of various target proteins. Mediates 'Lys-48'-linked polyubiquitination of PRR5L and its subsequent proteasomal degradation thereby indirectly regulating cell migration through the mTORC2 complex. Ubiquitinates the caspases CASP8 and CASP10, promoting their proteasomal de…	rififylin;fring;RNF189;RNF34L;CARP2;CARP-2	ring finger and FYVE like domain containing E3 ubiquitin protein ligase
PACS1	-1.25	1	0.18	1	55690	PACS1	Coat protein that is involved in the localization of trans-Golgi network (TGN) membrane proteins that contain acidic cluster sorting motifs. Controls the endosome-to-Golgi trafficking of furin and mannose-6-phosphate receptor by connecting the acidic-cluster-containing cytoplasmic domain of these molecules with the adapter-protein complex-1 (AP-1) of endosomal clathrin- coated membrane pits. Invo…	FLJ10209;KIAA1175	phosphofurin acidic cluster sorting protein 1
MAB21L2	-1.25	1	0.48	1	10586	MAB21L2	Required for several aspects of embryonic development including normal development of the eye. {ECO:0000269|PubMed:24906020, ECO:0000269|PubMed:25719200}.	NA	mab-21 like 2
WASH1	-1.25	1	0.74	1	100287171	WASHC1	Acts as a nucleation-promoting factor (NPF) at the surface of endosomes, where it recruits and activates the Arp2/3 complex to induce actin polymerization, playing a key role in the fission of tubules that serve as transport intermediates during endosome sorting (PubMed:19922874, PubMed:19922875, PubMed:20498093, PubMed:23452853). Its assembly in the WASH core complex seems to inhibit its NPF act…	FLJ00038;FAM39E;WASH1	WASH complex subunit 1
ORC1	-1.25	1	1.04	1	4998	ORC1	Component of the origin recognition complex (ORC) that binds origins of replication. DNA-binding is ATP-dependent. The DNA sequences that define origins of replication have not been identified yet. ORC is required to assemble the pre-replication complex necessary to initiate DNA replication.	HSORC1;PARC1;ORC1L	origin recognition complex subunit 1
TPO	-1.24	1	-1.05	1	7173	TPO	Iodination and coupling of the hormonogenic tyrosines in thyroglobulin to yield the thyroid hormones T(3) and T(4). {ECO:0000250|UniProtKB:P09933}.	TPX	thyroid peroxidase
C3orf80	-1.24	1	-0.89	1	401097	C3orf80	NA	NA	chromosome 3 open reading frame 80
SCP2	-1.24	1	-0.78	1	6342	SCP2	Mediates in vitro the transfer of all common phospholipids, cholesterol and gangliosides between membranes. May play a role in regulating steroidogenesis. {ECO:0000269|PubMed:17157249, ECO:0000269|PubMed:8300590}.	NA	sterol carrier protein 2
AP5Z1	-1.24	1	-0.34	1	9907	AP5Z1	As part of AP-5, a probable fifth adaptor protein complex it may be involved in endosomal transport. According to PubMed:20613862 it is a putative helicase required for efficient homologous recombination DNA double-strand break repair. {ECO:0000269|PubMed:20613862, ECO:0000269|PubMed:22022230}.	SPG48;zeta;KIAA0415	adaptor related protein complex 5 subunit zeta 1
CEND1	-1.24	1	-0.14	1	51286	CEND1	Involved in neuronal differentiation. {ECO:0000250|UniProtKB:Q9JKC6}.	FLJ90066;BM88	cell cycle exit and neuronal differentiation 1
CDR2L	-1.24	1	-0.11	1	30850	CDR2L	NA	HUMPPA	cerebellar degeneration related protein 2 like
FAM134B	-1.24	1	-0.06	1	54463	RETREG1	Endoplasmic reticulum-anchored autophagy receptor that mediates ER delivery into lysosomes through sequestration into autophagosomes (PubMed:26040720). Promotes membrane remodeling and ER scission via its membrane bending capacity and targets the fragments into autophagosomes via interaction with ATG8 family proteins (PubMed:26040720). Required for long-term survival of nociceptive and autonomic …	FLJ20152;JK1;FAM134B	reticulophagy regulator 1
TAS2R10	-1.24	1	0	1	50839	TAS2R10	Gustducin-coupled strychnine receptor implicated in the perception of bitter compounds in the oral cavity and the gastrointestinal tract. Signals through PLCB2 and the calcium- regulated cation channel TRPM5. {ECO:0000269|PubMed:15759003}.	T2R10;TRB2	taste 2 receptor member 10
RPL9	-1.24	1	0.04	1	6133	RPL9	NA	L9	ribosomal protein L9
PPP1R37	-1.24	1	0.07	1	284352	PPP1R37	Inhibits phosphatase activity of protein phosphatase 1 (PP1) complexes. {ECO:0000269|PubMed:19389623}.	LRRC68	protein phosphatase 1 regulatory subunit 37
MSL3	-1.24	1	0.11	1	10943	MSL3	May be involved in chromatin remodeling and transcriptional regulation. May have a role in X inactivation. Component of the MSL complex which is responsible for the majority of histone H4 acetylation at 'Lys-16' which is implicated in the formation of higher-order chromatin structure. Specifically recognizes histone H4 monomethylated at 'Lys-20' (H4K20Me1) in a DNA-dependent manner and is propose…	MSL3L1	MSL complex subunit 3
TBCD	-1.24	1	0.17	1	6904	TBCD	Tubulin-folding protein implicated in the first step of the tubulin folding pathway and required for tubulin complex assembly. Involved in the regulation of microtubule polymerization or depolymerization, it modulates microtubule dynamics by capturing GTP-bound beta-tubulin (TUBB). Its ability to interact with beta tubulin is regulated via its interaction with ARL2. Acts as a GTPase-activating pr…	NA	tubulin folding cofactor D
ZFPL1	-1.24	1	0.32	1	7542	ZFPL1	Required for cis-Golgi integrity and efficient ER to Golgi transport. Involved in the maintenance of the integrity of the cis-Golgi, possibly via its interaction with GOLGA2/GM130. {ECO:0000269|PubMed:18323775}.	D11S750;MCG4	zinc finger protein like 1
MMGT1	-1.24	1	0.42	1	93380	MMGT1	Mediates Mg(2+) transport. {ECO:0000250|UniProtKB:Q8K273}.	EMC5;TMEM32	membrane magnesium transporter 1
HRH1	-1.24	1	0.78	1	3269	HRH1	In peripheral tissues, the H1 subclass of histamine receptors mediates the contraction of smooth muscles, increase in capillary permeability due to contraction of terminal venules, and catecholamine release from adrenal medulla, as well as mediating neurotransmission in the central nervous system.	NA	histamine receptor H1
OPN4	-1.24	1	1.17	1	94233	OPN4	Photoreceptor required for regulation of circadian rhythm. Contributes to pupillar reflex and other non-image forming responses to light. May be able to isomerize covalently bound all- trans retinal back to 11-cis retinal (By similarity). {ECO:0000250, ECO:0000269|PubMed:10632589, ECO:0000269|PubMed:15674244}.	MOP;melanopsin	opsin 4
FAM81B	-1.23	1	-0.85	1	153643	FAM81B	NA	FLJ25333	family with sequence similarity 81 member B
MAGT1	-1.23	1	-0.55	1	84061	MAGT1	Acts as accessory component of the N-oligosaccharyl transferase (OST) complex which catalyzes the transfer of a high mannose oligosaccharide from a lipid-linked oligosaccharide donor to an asparagine residue within an Asn-X-Ser/Thr consensus motif in nascent polypeptide chains. Involved in N-glycosylation of STT3B-dependent substrates. Specifically required for the glycosylation of a subset of ac…	DKFZp564K142;IAP;OST3B;MRX95	magnesium transporter 1
VGLL3	-1.23	1	-0.5	1	389136	VGLL3	May act as a specific coactivator for the mammalian TEFs. {ECO:0000250|UniProtKB:Q8N8G2}.	VGL-3	vestigial like family member 3
CD6	-1.23	1	-0.45	1	923	CD6	Cell adhesion molecule that mediates cell-cell contacts and regulates T-cell responses via its interaction with ALCAM/CD166 (PubMed:15048703, PubMed:15294938, PubMed:16352806, PubMed:16914752, PubMed:24945728, PubMed:24584089). Contributes to signaling cascades triggered by activation of the TCR/CD3 complex (PubMed:24584089). Functions as costimulatory molecule; promotes T-cell activation and pro…	Tp120	CD6 molecule
RHBDL2	-1.23	1	-0.41	1	54933	RHBDL2	Involved in regulated intramembrane proteolysis and the subsequent release of functional polypeptides from their membrane anchors. Known substrate: EFNB3. {ECO:0000269|PubMed:11672525, ECO:0000269|PubMed:15047175}.	FLJ20435	rhomboid like 2
SYNPO2	-1.23	1	-0.34	1	171024	SYNPO2	Has an actin-binding and actin-bundling activity. Can induce the formation of F-actin networks in an isoform-specific manner (PubMed:24005909, PubMed:23225103). At the sarcomeric Z lines is proposed to act as adapter protein that links nascent myofibers to the sarcolemma via ZYX and may play a role in early assembly and stabilization of the Z lines. Involved in autophagosome formation. May play a…	MYOPODIN	synaptopodin 2
IL11RA	-1.23	1	-0.08	1	3590	IL11RA	Receptor for interleukin-11. The receptor systems for IL6, LIF, OSM, CNTF, IL11 and CT1 can utilize IL6ST for initiating signal transmission. The IL11/IL11RA/IL6ST complex may be involved in the control of proliferation and/or differentiation of skeletogenic progenitor or other mesenchymal cells. Essential for the normal development of craniofacial bones and teeth. Restricts suture fusion and too…	NA	interleukin 11 receptor subunit alpha
SHISA9	-1.23	1	-0.06	1	729993	SHISA9	Regulator of short-term neuronal synaptic plasticity in the dentate gyrus. Associates with AMPA receptors (ionotropic glutamate receptors) in synaptic spines and promotes AMPA receptor desensitization at excitatory synapses (By similarity). {ECO:0000250}.	NA	shisa family member 9
MUL1	-1.23	1	0.01	1	79594	MUL1	Exhibits weak E3 ubiquitin-protein ligase activity (PubMed:18591963, PubMed:19407830, PubMed:22410793). E3 ubiquitin ligases accept ubiquitin from an E2 ubiquitin-conjugating enzyme in the form of a thioester and then directly transfer the ubiquitin to targeted substrates (PubMed:18591963, PubMed:19407830, PubMed:22410793). Can ubiquitinate AKT1 preferentially at 'Lys-284' involving 'Lys-48'-link…	FLJ12875;MULAN;RNF218;MAPL;GIDE;C1orf166	mitochondrial E3 ubiquitin protein ligase 1
LLPH	-1.23	1	0.36	1	84298	LLPH	In hippocampal neurons, regulates dendritic and spine growth and synaptic transmission. {ECO:0000250|UniProtKB:Q9D945}.	MGC14817;hLLP;C12orf31	LLP homolog, long-term synaptic facilitation factor
WTH3DI	-1.23	1	1.03	1	150786	RAB6D	NA	RAB6CL;WTH3DI	RAB6D, member RAS oncogene family
USP32	-1.22	1	-1.05	1	84669	USP32	NA	NY-REN-60;USP10	ubiquitin specific peptidase 32
MYO10	-1.22	1	-1.03	1	4651	MYO10	Myosins are actin-based motor molecules with ATPase activity. Unconventional myosins serve in intracellular movements. MYO10 binds to actin filaments and actin bundles and functions as plus end-directed motor. The tail domain binds to membranous compartments containing phosphatidylinositol 3,4,5-trisphosphate or integrins, and mediates cargo transport along actin filaments. Regulates cell shape, …	KIAA0799	myosin X
C2orf54	-1.22	1	-0.89	1	79919	MAB21L4	NA	FLJ22671;C2orf54	mab-21 like 4
SAR1B	-1.22	1	-0.58	1	51128	SAR1B	Involved in transport from the endoplasmic reticulum to the Golgi apparatus. Activated by the guanine nucleotide exchange factor PREB. Involved in the selection of the protein cargo and the assembly of the COPII coat complex.	SARA2	secretion associated Ras related GTPase 1B
IL32	-1.22	1	-0.25	1	9235	IL32	Cytokine that may play a role in innate and adaptive immune responses. It induces various cytokines such as TNFA/TNF- alpha and IL8. It activates typical cytokine signal pathways of NF-kappa-B and p38 MAPK. {ECO:0000269|PubMed:15664165}.	NK4;TAIF;TAIFb;TAIFd	interleukin 32
NEMF	-1.22	1	-0.23	1	9147	NEMF	Component of the ribosome quality control complex (RQC), a ribosome-associated complex that mediates ubiquitination and extraction of incompletely synthesized nascent chains for proteasomal degradation. NEMF is responsible for selective recognition of stalled 60S subunits by recognizing an exposed, nascent chain-conjugated tRNA moiety. NEMF is important for the stable association of LTN1 to the c…	NY-CO-1;FLJ10051;SDCCAG1	nuclear export mediator factor
UBXN8	-1.22	1	0.06	1	7993	UBXN8	Involved in endoplasmic reticulum-associated degradation (ERAD) for misfolded lumenal proteins, possibly by tethering VCP to the endoplasmic reticulum membrane. May play a role in reproduction. {ECO:0000269|PubMed:21949850}.	D8S2298E;REP8;UBXD6	UBX domain protein 8
MYBL2	-1.22	1	0.08	1	4605	MYBL2	Transcription factor involved in the regulation of cell survival, proliferation, and differentiation. Transactivates the expression of the CLU gene. {ECO:0000269|PubMed:10770937}.	BMYB;B-MYB	MYB proto-oncogene like 2
RPS21	-1.22	1	0.11	1	6227	RPS21	NA	S21	ribosomal protein S21
PIK3R4	-1.22	1	0.16	1	30849	PIK3R4	Regulatory subunit of the PI3K complex that mediates formation of phosphatidylinositol 3-phosphate; different complex forms are believed to play a role in multiple membrane trafficking pathways: PI3KC3-C1 is involved in initiation of autophagosomes and PI3KC3-C2 in maturation of autophagosomes and endocytosis. Involved in regulation of degradative endocytic trafficking and cytokinesis, probably i…	VPS15;p150	phosphoinositide-3-kinase regulatory subunit 4
SULT2A1	-1.22	1	0.27	1	6822	SULT2A1	Sulfotransferase that utilizes 3'-phospho-5'-adenylyl sulfate (PAPS) as sulfonate donor to catalyze the sulfonation of steroids and bile acids in the liver and adrenal glands.	DHEA-ST;STD	sulfotransferase family 2A member 1
PARK7	-1.22	1	0.28	1	11315	PARK7	Protein and nucleotide deglycase that catalyzes the deglycation of the Maillard adducts formed between amino groups of proteins or nucleotides and reactive carbonyl groups of glyoxals (PubMed:25416785, PubMed:28596309). Thus, functions as a protein deglycase that repairs methylglyoxal- and glyoxal-glycated proteins, and releases repaired proteins and lactate or glycolate, respectively. Deglycates…	DJ-1;DJ1;GATD2	Parkinsonism associated deglycase
SLC22A4	-1.22	1	0.62	1	6583	SLC22A4	Sodium-ion dependent, low affinity carnitine transporter. Probably transports one sodium ion with one molecule of carnitine. Also transports organic cations such as tetraethylammonium (TEA) without the involvement of sodium. Relative uptake activity ratio of carnitine to TEA is 1.78. A key substrate of this transporter seems to be ergothioneine (ET). {ECO:0000269|PubMed:10215651, ECO:0000269|PubM…	OCTN1;MGC34546;DFNB60	solute carrier family 22 member 4
KPRP	-1.21	1	-1.82	0.985	448834	KPRP	NA	C1orf45	keratinocyte proline rich protein
NCAPD2	-1.21	1	-1.64	1	9918	NCAPD2	Regulatory subunit of the condensin complex, a complex required for conversion of interphase chromatin into mitotic-like condense chromosomes. The condensin complex probably introduces positive supercoils into relaxed DNA in the presence of type I topoisomerases and converts nicked DNA into positive knotted forms in the presence of type II topoisomerases. May target the condensin complex to DNA v…	CNAP1;hCAP-D2;CAP-D2;KIAA0159	non-SMC condensin I complex subunit D2
SLBP	-1.21	1	-1.36	1	7884	SLBP	RNA-binding protein involved in the histone pre-mRNA processing. Binds the stem-loop structure of replication-dependent histone pre-mRNAs and contributes to efficient 3'-end processing by stabilizing the complex between histone pre-mRNA and U7 small nuclear ribonucleoprotein (snRNP), via the histone downstream element (HDE). Plays an important role in targeting mature histone mRNA from the nucleu…	HBP	stem-loop binding protein
PRAMEF13	-1.21	1	-1.08	1	400736	NA	NA	NA	NA
FRAT2	-1.21	1	-1.01	1	23401	FRAT2	Positively regulates the Wnt signaling pathway by stabilizing beta-catenin through the association with GSK-3.	NA	FRAT2, WNT signaling pathway regulator
NELFCD	-1.21	1	-0.97	1	51497	NELFCD	Essential component of the NELF complex, a complex that negatively regulates the elongation of transcription by RNA polymerase II. The NELF complex, which acts via an association with the DSIF complex and causes transcriptional pausing, is counteracted by the P-TEFb kinase complex. The NELF complex is involved in HIV-1 latency possibly involving recruitment of PCF11 to paused RNA polymerase II. B…	HSPC130;TH1;NELF-C;NELF-D;TH1L	negative elongation factor complex member C/D
LAMC3	-1.21	1	-0.91	1	10319	LAMC3	Binding to cells via a high affinity receptor, laminin is thought to mediate the attachment, migration and organization of cells into tissues during embryonic development by interacting with other extracellular matrix components.	DKFZp434E202	laminin subunit gamma 3
SSR2	-1.21	1	-0.69	1	6746	SSR2	TRAP proteins are part of a complex whose function is to bind calcium to the ER membrane and thereby regulate the retention of ER resident proteins.	TLAP;TRAPB	signal sequence receptor subunit 2
EDC4	-1.21	1	-0.66	1	23644	EDC4	In the process of mRNA degradation, seems to play a role in mRNA decapping. Component of a complex containing DCP2 and DCP1A which functions in decapping of ARE-containing mRNAs. Promotes complex formation between DCP1A and DCP2. Enhances the catalytic activity of DCP2 (in vitro). {ECO:0000269|PubMed:16364915}.	RCD-8;Ge-1;HEDLS	enhancer of mRNA decapping 4
ZBTB45	-1.21	1	-0.61	1	84878	ZBTB45	May be involved in transcriptional regulation (Probable). In the central nervous system, may play a role in glial cell differentiation (By similarity). {ECO:0000250|UniProtKB:Q52KG4, ECO:0000305}.	FLJ14486;ZNF499	zinc finger and BTB domain containing 45
INTS6	-1.21	1	-0.6	1	26512	INTS6	Component of the Integrator (INT) complex, a complex involved in the small nuclear RNAs (snRNA) U1 and U2 transcription and in their 3'-box-dependent processing. The Integrator complex is associated with the C-terminal domain (CTD) of RNA polymerase II largest subunit (POLR2A) and is recruited to the U1 and U2 snRNAs genes (Probable). Mediates recruitment of cytoplasmic dynein to the nuclear enve…	DICE1;HDB;Notchl2;DBI-1;DDX26A;INT6;DDX26	integrator complex subunit 6
UBE2D2	-1.21	1	-0.49	1	7322	UBE2D2	Accepts ubiquitin from the E1 complex and catalyzes its covalent attachment to other proteins. In vitro catalyzes 'Lys- 48'-linked polyubiquitination. Mediates the selective degradation of short-lived and abnormal proteins. Functions in the E6/E6-AP- induced ubiquitination of p53/TP53. Mediates ubiquitination of PEX5 and autoubiquitination of STUB1 and TRAF6. Involved in the signal-induced conjug…	UbcH5B;UBC4	ubiquitin conjugating enzyme E2 D2
TSPYL1	-1.21	1	-0.45	1	7259	TSPYL1	NA	TSPYL	TSPY like 1
PCP4L1	-1.21	1	-0.44	1	654790	PCP4L1	NA	IQM1	Purkinje cell protein 4 like 1
SULT1B1	-1.21	1	-0.38	1	27284	SULT1B1	Sulfotransferase that utilizes 3'-phospho-5'-adenylyl sulfate (PAPS) as sulfonate donor to catalyze the sulfate conjugation of many hormones, neurotransmitters, drugs and xenobiotic compounds. Sulfonation increases the water solubility of most compounds, and therefore their renal excretion, but it can also result in bioactivation to form active metabolites. Sulfates dopamine, small phenols such a…	ST1B2	sulfotransferase family 1B member 1
PPM1D	-1.21	1	-0.37	1	8493	PPM1D	Involved in the negative regulation of p53 expression (PubMed:23242139). Required for the relief of p53-dependent checkpoint mediated cell cycle arrest. Binds to and dephosphorylates 'Ser-15' of TP53 and 'Ser-345' of CHEK1 which contributes to the functional inactivation of these proteins (PubMed:15870257, PubMed:16311512). Mediates MAPK14 dephosphorylation and inactivation (PubMed:21283629). Is …	Wip1;PP2C-DELTA	protein phosphatase, Mg2+/Mn2+ dependent 1D
CCDC17	-1.21	1	-0.37	1	149483	CCDC17	NA	FLJ33084	coiled-coil domain containing 17
AMMECR1	-1.21	1	-0.33	1	9949	AMMECR1	NA	NA	Alport syndrome, mental retardation, midface hypoplasia and elliptocytosis chromosomal region gene 1
P4HA3	-1.21	1	-0.2	1	283208	P4HA3	Catalyzes the post-translational formation of 4- hydroxyproline in -Xaa-Pro-Gly- sequences in collagens and other proteins. {ECO:0000269|PubMed:12874193, ECO:0000269|PubMed:14500733}.	C-P4Halpha(III)	prolyl 4-hydroxylase subunit alpha 3
LRIG3	-1.21	1	0.09	1	121227	LRIG3	May play a role in craniofacial and inner ear morphogenesis during embryonic development. May act within the otic vesicle epithelium to control formation of the lateral semicircular canal in the inner ear, possibly by restricting the expression of NTN1 (By similarity). {ECO:0000250}.	FLJ90440;KIAA3016	leucine rich repeats and immunoglobulin like domains 3
IL1R1	-1.21	1	0.22	1	3554	IL1R1	Receptor for IL1A, IL1B and IL1RN. After binding to interleukin-1 associates with the coreceptor IL1RAP to form the high affinity interleukin-1 receptor complex which mediates interleukin-1-dependent activation of NF-kappa-B, MAPK and other pathways. Signaling involves the recruitment of adapter molecules such as TOLLIP, MYD88, and IRAK1 or IRAK2 via the respective TIR domains of the receptor/cor…	D2S1473;CD121A;IL1R;IL1RA	interleukin 1 receptor type 1
CLDN5	-1.21	1	0.42	1	7122	CLDN5	Plays a major role in tight junction-specific obliteration of the intercellular space. {ECO:0000250}.	CPETRL1;BEC1;AWAL;TMVCF	claudin 5
KDM2A	-1.21	1	0.44	1	22992	KDM2A	Histone demethylase that specifically demethylates 'Lys- 36' of histone H3, thereby playing a central role in histone code. Preferentially demethylates dimethylated H3 'Lys-36' residue while it has weak or no activity for mono- and tri-methylated H3 'Lys- 36'. May also recognize and bind to some phosphorylated proteins and promote their ubiquitination and degradation. Required to maintain the het…	KIAA1004;FBL11;LILINA;DKFZP434M1735;FBL7;FLJ00115;CXXC8;JHDM1A;FBXL11	lysine demethylase 2A
PSAP	-1.21	1	0.74	1	5660	PSAP	Saposin-A and saposin-C stimulate the hydrolysis of glucosylceramide by beta-glucosylceramidase (EC 3.2.1.45) and galactosylceramide by beta-galactosylceramidase (EC 3.2.1.46). Saposin-C apparently acts by combining with the enzyme and acidic lipid to form an activated complex, rather than by solubilizing the substrate. Saposin-D is a specific sphingomyelin phosphodiesterase activator (EC 3.1.4.1…	SAP1;GLBA	prosaposin
NCAPG	-1.2	1	-1.61	1	64151	NCAPG	Regulatory subunit of the condensin complex, a complex required for conversion of interphase chromatin into mitotic-like condense chromosomes. The condensin complex probably introduces positive supercoils into relaxed DNA in the presence of type I topoisomerases and converts nicked DNA into positive knotted forms in the presence of type II topoisomerases. {ECO:0000269|PubMed:11136719}.	FLJ12450;hCAP-G;CAP-G;YCG1	non-SMC condensin I complex subunit G
COX7A2	-1.2	1	-1.23	1	1347	COX7A2	This protein is one of the nuclear-coded polypeptide chains of cytochrome c oxidase, the terminal oxidase in mitochondrial electron transport.	COXVIIa-L;COX7AL	cytochrome c oxidase subunit 7A2
KLK3	-1.2	1	-1.03	1	354	KLK3	Hydrolyzes semenogelin-1 thus leading to the liquefaction of the seminal coagulum.	PSA;APS	kallikrein related peptidase 3
AOC2	-1.2	1	-0.53	1	314	AOC2	Has a monoamine oxidase activity with substrate specificity for 2-phenylethylamine and tryptamine. May play a role in adipogenesis. May be a critical modulator of signal transmission in retina. {ECO:0000269|PubMed:17400359, ECO:0000269|PubMed:19588076}.	RAO;DAO2	amine oxidase, copper containing 2
FBXW12	-1.2	1	-0.51	1	285231	FBXW12	Substrate-recognition component of the SCF (SKP1-CUL1-F- box protein)-type E3 ubiquitin ligase complex. {ECO:0000250}.	Fbw12;FBXO35	F-box and WD repeat domain containing 12
KIDINS220	-1.2	1	-0.13	1	57498	KIDINS220	Promotes a prolonged MAP-kinase signaling by neurotrophins through activation of a Rap1-dependent mechanism. Provides a docking site for the CRKL-C3G complex, resulting in Rap1-dependent sustained ERK activation. May play an important role in regulating postsynaptic signal transduction through the syntrophin-mediated localization of receptor tyrosine kinases such as EPHA4. In cooperation with SNT…	ARMS	kinase D interacting substrate 220
F13A1	-1.2	1	0.04	1	2162	F13A1	Factor XIII is activated by thrombin and calcium ion to a transglutaminase that catalyzes the formation of gamma-glutamyl- epsilon-lysine cross-links between fibrin chains, thus stabilizing the fibrin clot. Also cross-link alpha-2-plasmin inhibitor, or fibronectin, to the alpha chains of fibrin. {ECO:0000269|PubMed:27363989}.	F13A	coagulation factor XIII A chain
IFI44L	-1.2	1	0.07	1	10964	IFI44L	Exhibits a low antiviral activity against hepatitis C virus. {ECO:0000269|PubMed:21478870}.	GS3686;C1orf29	interferon induced protein 44 like
MYH10	-1.2	1	0.15	1	4628	MYH10	Cellular myosin that appears to play a role in cytokinesis, cell shape, and specialized functions such as secretion and capping. Involved with LARP6 in the stabilization of type I collagen mRNAs for CO1A1 and CO1A2. During cell spreading, plays an important role in cytoskeleton reorganization, focal contacts formation (in the central part but not the margins of spreading cells), and lamellipodial…	NMMHCB	myosin heavy chain 10
ZNF175	-1.2	1	0.37	1	7728	ZNF175	Down-regulates the expression of several chemokine receptors. Interferes with HIV-1 replication by suppressing Tat- induced viral LTR promoter activity. {ECO:0000269|PubMed:14688346}.	OTK18	zinc finger protein 175
RPS11	-1.19	1	-1.08	1	6205	RPS11	NA	S11	ribosomal protein S11
SNRPB	-1.19	1	-1.02	1	6628	SNRPB	Core component of the spliceosomal U1, U2, U4 and U5 small nuclear ribonucleoproteins (snRNPs), the building blocks of the spliceosome. Thereby, plays an important role in the splicing of cellular pre-mRNAs. Most spliceosomal snRNPs contain a common set of Sm proteins SNRPB, SNRPD1, SNRPD2, SNRPD3, SNRPE, SNRPF and SNRPG that assemble in a heptameric protein ring on the Sm site of the small nucle…	COD;SmB/SmB';Sm-B/B';snRNP-B;SNRPB1	small nuclear ribonucleoprotein polypeptides B and B1
RPL26L1	-1.19	1	-1.01	1	51121	RPL26L1	NA	RPL26P1	ribosomal protein L26 like 1
RSRC1	-1.19	1	-0.89	1	51319	RSRC1	Plays a role in pre-mRNA splicing. Involved in both constitutive and alternative pre-mRNA splicing. May have a role in the recognition of the 3' splice site during the second step of splicing. {ECO:0000269|PubMed:15798186}.	MGC12197;BM-011;SRrp53;SFRS21	arginine and serine rich coiled-coil 1
UPK1A	-1.19	1	-0.78	1	11045	UPK1A	Component of the asymmetric unit membrane (AUM); a highly specialized biomembrane elaborated by terminally differentiated urothelial cells. May play an important role in normal bladder epithelial physiology, possibly in regulating membrane permeability of superficial umbrella cells or in stabilizing the apical membrane through AUM/cytoskeletal interactions (By similarity). {ECO:0000250}.	TSPAN21	uroplakin 1A
LIMS1	-1.19	1	-0.7	1	3987	LIMS1	Adapter protein in a cytoplasmic complex linking beta- integrins to the actin cytoskeleton, bridges the complex to cell surface receptor tyrosine kinases and growth factor receptors. Involved in the regulation of cell survival, cell proliferation and cell differentiation.	PINCH;PINCH1	LIM zinc finger domain containing 1
HDGFRP3	-1.19	1	-0.56	1	50810	HDGFL3	Enhances DNA synthesis and may play a role in cell proliferation. {ECO:0000269|PubMed:10581169}.	HRP-3;Hdgfrp3	HDGF like 3
DPT	-1.19	1	-0.52	1	1805	DPT	Seems to mediate adhesion by cell surface integrin binding. May serve as a communication link between the dermal fibroblast cell surface and its extracellular matrix environment. Enhances TGFB1 activity. Inhibits cell proliferation. Accelerates collagen fibril formation, and stabilizes collagen fibrils against low-temperature dissociation (By similarity). {ECO:0000250}.	NA	dermatopontin
EXOC8	-1.19	1	-0.45	1	149371	EXOC8	Component of the exocyst complex involved in the docking of exocytic vesicles with fusion sites on the plasma membrane.	SEC84;EXO84;Exo84p	exocyst complex component 8
C11orf35	-1.19	1	-0.34	1	256329	LMNTD2	NA	MGC35138;C11orf35	lamin tail domain containing 2
TMC6	-1.19	1	-0.23	1	11322	TMC6	Probable ion channel. {ECO:0000250}.	LAK-4P;EVIN1;EVER1	transmembrane channel like 6
C11orf65	-1.19	1	-0.21	1	160140	C11orf65	NA	MGC33948	chromosome 11 open reading frame 65
OR5H15	-1.19	1	-0.2	1	403274	OR5H15	Odorant receptor. {ECO:0000305}.	NA	olfactory receptor family 5 subfamily H member 15
PUM2	-1.19	1	-0.08	1	23369	PUM2	Sequence-specific RNA-binding protein that acts as a post-transcriptional repressor by binding the 3'-UTR of mRNA targets. Binds to an RNA consensus sequence, the Pumilio Response Element (PRE), 5'-UGUANAUA-3', that is related to the Nanos Response Element (NRE) (, PubMed:21397187). Mediates post- transcriptional repression of transcripts via different mechanisms: acts via direct recruitment of t…	PUMH2;KIAA0235	pumilio RNA binding family member 2
IHH	-1.19	1	-0.02	1	3549	IHH	Intercellular signal essential for a variety of patterning events during development. Binds to the patched (PTC) receptor, which functions in association with smoothened (SMO), to activate the transcription of target genes. Implicated in endochondral ossification: may regulate the balance between growth and ossification of the developing bones. Induces the expression of parathyroid hormone-relate…	HHG2;BDA1	Indian hedgehog signaling molecule
CMBL	-1.19	1	-0.01	1	134147	CMBL	Cysteine hydrolase. Can convert the prodrug olmesartan medoxomil into its pharmacologically active metabolite olmerstatan, an angiotensin receptor blocker, in liver and intestine. May also activate beta-lactam antibiotics faropenem medoxomil and lenampicillin. {ECO:0000269|PubMed:20177059}.	FLJ23617	carboxymethylenebutenolidase homolog
CRELD1	-1.19	1	0.07	1	78987	CRELD1	NA	AVSD2	cysteine rich with EGF like domains 1
ST20-MTHFS	-1.19	1	0.14	1	100528021	NA	NA	NA	NA
THAP4	-1.19	1	0.17	1	51078	THAP4	NA	CGI-36	THAP domain containing 4
SRD5A2	-1.19	1	0.28	1	6716	SRD5A2	Converts testosterone (T) into 5-alpha- dihydrotestosterone (DHT) and progesterone or corticosterone into their corresponding 5-alpha-3-oxosteroids. It plays a central role in sexual differentiation and androgen physiology. {ECO:0000269|PubMed:10898110}.	NA	steroid 5 alpha-reductase 2
BCAN	-1.19	1	0.33	1	63827	BCAN	May play a role in the terminally differentiating and the adult nervous system during postnatal development. Could stabilize interactions between hyaluronan (HA) and brain proteoglycans.	BEHAB;MGC13038;CSPG7	brevican
ZNF728	-1.19	1	0.4	1	388523	ZNF728	NA	NA	zinc finger protein 728
SF3A3	-1.18	1	-1.86	1	10946	SF3A3	Subunit of the splicing factor SF3A required for 'A' complex assembly formed by the stable binding of U2 snRNP to the branchpoint sequence (BPS) in pre-mRNA. Sequence independent binding of SF3A/SF3B complex upstream of the branch site is essential, it may anchor U2 snRNP to the pre-mRNA. May also be involved in the assembly of the 'E' complex.	SF3a60;SAP61;PRP9;PRPF9	splicing factor 3a subunit 3
C16orf97	-1.18	1	-0.96	1	388276	NA	NA	NA	NA
FUK	-1.18	1	-0.96	1	197258	FUK	Takes part in the salvage pathway for reutilization of fucose from the degradation of oligosaccharides.	FLJ39408	fucokinase
MYO18A	-1.18	1	-0.94	1	399687	MYO18A	May link Golgi membranes to the cytoskeleton and participate in the tensile force required for vesicle budding from the Golgi. Thereby, may play a role in Golgi membrane trafficking and could indirectly give its flattened shape to the Golgi apparatus (PubMed:19837035, PubMed:23345592). Alternatively, in concert with LURAP1 and CDC42BPA/CDC42BPB, has been involved in modulating lamellar actomyosin…	KIAA0216;MysPDZ	myosin XVIIIA
OR2T10	-1.18	1	-0.59	1	127069	OR2T10	Odorant receptor. {ECO:0000305}.	NA	olfactory receptor family 2 subfamily T member 10
EIF2D	-1.18	1	-0.48	1	1939	EIF2D	Translation initiation factor that is able to deliver tRNA to the P-site of the eukaryotic ribosome in a GTP-independent manner. The binding of Met-tRNA(I) occurs after the AUG codon finds its position in the P-site of 40S ribosomes, the situation that takes place during initiation complex formation on some specific RNAs. Its activity in tRNA binding with 40S subunits does not require the presenc…	LGTN	eukaryotic translation initiation factor 2D
BCL2L2	-1.18	1	-0.47	1	599	BCL2L2	Promotes cell survival. Blocks dexamethasone-induced apoptosis. Mediates survival of postmitotic Sertoli cells by suppressing death-promoting activity of BAX. {ECO:0000269|PubMed:8761287}.	KIAA0271;BCL-W;PPP1R51	BCL2 like 2
CENPE	-1.18	1	-0.46	1	1062	CENPE	Microtubule plus-end-directed kinetochore motor which plays an important role in chromosome congression, microtubule- kinetochore conjugation and spindle assembly checkpoint activation. Drives chromosome congression (alignment of chromosomes at the spindle equator resulting in the formation of the metaphase plate) by mediating the lateral sliding of polar chromosomes along spindle microtubules to…	KIF10;PPP1R61	centromere protein E
FAM63B	-1.18	1	-0.29	1	54629	MINDY2	Hydrolase that can remove 'Lys-48'-linked conjugated ubiquitin from proteins (PubMed:27292798). Binds to polyubiquitin chains of different linkage types, including 'Lys-6', 'Lys-11', 'Lys-29', 'Lys-33', 'Lys-48' and 'Lys-63' (PubMed:28082312). May play a regulatory role at the level of protein turnover (PubMed:27292798). {ECO:0000269|PubMed:27292798, ECO:0000269|PubMed:28082312}.	KIAA1164;FAM63B	MINDY lysine 48 deubiquitinase 2
PTGFR	-1.18	1	-0.29	1	5737	PTGFR	Receptor for prostaglandin F2-alpha (PGF2-alpha). The activity of this receptor is mediated by G proteins which activate a phosphatidylinositol-calcium second messenger system. Initiates luteolysis in the corpus luteum (By similarity). Isoforms 2 to 7 do not bind PGF2-alpha but are proposed to modulate signaling by participating in variant receptor complexes; heterodimers between isoform 1 and is…	FP	prostaglandin F receptor
SHFM1	-1.18	1	-0.28	1	7979	SEM1	NA	DSS1;Shfdg1;ECD;SHSF1;FLJ42280;SHFD1;SHFM1;C7orf76	SEM1, 26S proteasome complex subunit
CCDC130	-1.18	1	-0.21	1	81576	CCDC130	NA	MGC10471	coiled-coil domain containing 130
PCDHB14	-1.18	1	-0.18	1	56122	NA	Potential calcium-dependent cell-adhesion protein. May be involved in the establishment and maintenance of specific neuronal connections in the brain.	NA	NA
HEXIM1	-1.18	1	0.16	1	10614	HEXIM1	Transcriptional regulator which functions as a general RNA polymerase II transcription inhibitor (PubMed:14580347, PubMed:15713661, PubMed:15201869). In cooperation with 7SK snRNA sequesters P-TEFb in a large inactive 7SK snRNP complex preventing RNA polymerase II phosphorylation and subsequent transcriptional elongation (PubMed:12832472, PubMed:14580347, PubMed:15713661, PubMed:15201869). May al…	CLP-1;HIS1;MAQ1;EDG1	HEXIM P-TEFb complex subunit 1
ERCC1	-1.18	1	0.18	1	2067	ERCC1	Isoform 1: Non-catalytic component of a structure- specific DNA repair endonuclease responsible for the 5'-incision during DNA repair. Responsible, in conjunction with SLX4, for the first step in the repair of interstrand cross-links (ICL). Participates in the processing of anaphase bridge-generating DNA structures, which consist in incompletely processed DNA lesions arising during S or G2 phase,…	RAD10	ERCC excision repair 1, endonuclease non-catalytic subunit
ATRIP	-1.18	1	0.26	1	84126	ATRIP	Required for checkpoint signaling after DNA damage. Required for ATR expression, possibly by stabilizing the protein. {ECO:0000269|PubMed:12791985}.	FLJ12343;MGC20625;MGC21482;MGC26740	ATR interacting protein
FCHSD2	-1.18	1	0.27	1	9873	FCHSD2	NA	KIAA0769;SH3MD3	FCH and double SH3 domains 2
HTRA2	-1.18	1	0.31	1	27429	HTRA2	Serine protease that shows proteolytic activity against a non-specific substrate beta-casein. Promotes or induces cell death either by direct binding to and inhibition of BIRC proteins (also called inhibitor of apoptosis proteins, IAPs), leading to an increase in caspase activity, or by a BIRC inhibition-independent, caspase-independent and serine protease activity-dependent mechanism. Cleaves TH…	OMI;PARK13;PRSS25	HtrA serine peptidase 2
KRTAP10-12	-1.18	1	0.4	1	386685	KRTAP10-12	In the hair cortex, hair keratin intermediate filaments are embedded in an interfilamentous matrix, consisting of hair keratin-associated proteins (KRTAP), which are essential for the formation of a rigid and resistant hair shaft through their extensive disulfide bond cross-linking with abundant cysteine residues of hair keratins. The matrix proteins include the high- sulfur and high-glycine-tyro…	KRTAP18.12;KAP10.12;KRTAP18-12	keratin associated protein 10-12
DHX36	-1.18	1	0.46	1	170506	DHX36	Proposed to have a global role in regulating mRNA expression including transcriptional regulation and mRNA stability. Binds with high affinity to and resolves tetramolecular RNA and DNA quadruplex structures. Unwinds intramolecular quadruplexes derived from the ZIC1 and the MYC promoters. Binds to quadruplex structures in the promoters of YY1 and ALPL genes and regulates their expression. Binds t…	MLEL1;KIAA1488;RHAU;DDX36	DEAH-box helicase 36
AXIN1	-1.18	1	0.59	1	8312	AXIN1	Component of the beta-catenin destruction complex required for regulating CTNNB1 levels through phosphorylation and ubiquitination, and modulating Wnt-signaling (PubMed:12192039, PubMed:27098453). Controls dorsoventral patterning via two opposing effects; down-regulates CTNNB1 to inhibit the Wnt signaling pathway and ventralize embryos, but also dorsalizes embryos by activating a Wnt-independent …	PPP1R49	axin 1
PPP2CA	-1.18	1	1.29	1	5515	PPP2CA	PP2A is the major phosphatase for microtubule-associated proteins (MAPs). PP2A can modulate the activity of phosphorylase B kinase casein kinase 2, mitogen-stimulated S6 kinase, and MAP-2 kinase. Cooperates with SGO2 to protect centromeric cohesin from separase-mediated cleavage in oocytes specifically during meiosis I (By similarity). Can dephosphorylate SV40 large T antigen and p53/TP53. Activa…	PP2Calpha;PP2AC	protein phosphatase 2 catalytic subunit alpha
SLC17A5	-1.17	1	-2.3	0.276	26503	SLC17A5	Transports glucuronic acid and free sialic acid out of the lysosome after it is cleaved from sialoglycoconjugates undergoing degradation, this is required for normal CNS myelination. Mediates aspartate and glutamate membrane potential- dependent uptake into synaptic vesicles and synaptic-like microvesicles. Also functions as an electrogenic 2NO(3)(-)/H(+) cotransporter in the plasma membrane of s…	AST;SD;ISSD;NSD;SIALIN;SLD;SIASD	solute carrier family 17 member 5
DDX54	-1.17	1	-1.32	1	79039	DDX54	Has RNA-dependent ATPase activity. Represses the transcriptional activity of nuclear receptors. {ECO:0000269|PubMed:12466272}.	MGC2835;APR-5;DP97	DEAD-box helicase 54
BCL6B	-1.17	1	-1.02	1	255877	BCL6B	Acts as a sequence-specific transcriptional repressor in association with BCL6. May function in a narrow stage or be related to some events in the early B-cell development. {ECO:0000269|PubMed:11855826}.	ZBTB28;BAZF;ZNF62	BCL6B, transcription repressor
KIAA0430	-1.17	1	-0.99	1	9665	MARF1	Essential regulator of oogenesis required for female meiotic progression to repress transposable elements and preventing their mobilization, which is essential for the germline integrity. Probably acts via some RNA metabolic process, equivalent to the piRNA system in males, which mediates the repression of transposable elements during meiosis by forming complexes composed of RNAs and governs the …	LKAP;PPP1R34;Marf1;LMKB;KIAA0430	meiosis regulator and mRNA stability factor 1
PYCR1	-1.17	1	-0.91	1	5831	PYCR1	Housekeeping enzyme that catalyzes the last step in proline biosynthesis. Can utilize both NAD and NADP, but has higher affinity for NAD. Involved in the cellular response to oxidative stress. {ECO:0000269|PubMed:16730026, ECO:0000269|PubMed:19648921}.	P5C	pyrroline-5-carboxylate reductase 1
LCE2A	-1.17	1	-0.91	1	353139	LCE2A	Precursors of the cornified envelope of the stratum corneum.	LEP9	late cornified envelope 2A
STARD7	-1.17	1	-0.89	1	56910	STARD7	May play a protective role in mucosal tissues by preventing exaggerated allergic responses. {ECO:0000250|UniProtKB:Q8R1R3}.	GTT1	StAR related lipid transfer domain containing 7
FSD1	-1.17	1	-0.84	1	79187	FSD1	May be involved in microtubule organization and stabilization. {ECO:0000269|PubMed:12154070, ECO:0000269|PubMed:12445389}.	MGC3213;MIR1	fibronectin type III and SPRY domain containing 1
CREBL2	-1.17	1	-0.63	1	1389	CREBL2	Probable regulator of CREB1 transcriptional activity which is involved in adipose cells differentiation. May also play a regulatory role in the cell cycle. Identification in a chromosomal region frequently deleted in various cancers suggests that it might act as a tumor suppressor. {ECO:0000269|PubMed:9693048}.	NA	cAMP responsive element binding protein like 2
CCDC57	-1.17	1	-0.5	1	284001	CCDC57	NA	FLJ00130;FLJ23754	coiled-coil domain containing 57
SMARCA1	-1.17	1	-0.47	1	6594	SMARCA1	Energy-transducing component of NURF (nucleosome- remodeling factor) and CERF (CECR2-containing-remodeling factor) complexes. Both complexes facilitate the perturbation of chromatin structure in an ATP-dependent manner. Potentiates neurite outgrowth. May be involved in brain development by regulating En-1 and En-2 expression. May be involved in the development of luteal cells. {ECO:0000269|PubMed…	SNF2LB;NURF140;ISWI;SWI;hSNF2L;SNF2L1;SNF2L	SWI/SNF related, matrix associated, actin dependent regulator of chromatin, subfamily a, member 1
BAG4	-1.17	1	-0.46	1	9530	BAG4	Inhibits the chaperone activity of HSP70/HSC70 by promoting substrate release (By similarity). Prevents constitutive TNFRSF1A signaling. Negative regulator of PRKN translocation to damaged mitochondria. {ECO:0000250, ECO:0000269|PubMed:24270810}.	SODD	BCL2 associated athanogene 4
MUC6	-1.17	1	-0.35	1	4588	MUC6	May provide a mechanism for modulation of the composition of the protective mucus layer related to acid secretion or the presence of bacteria and noxious agents in the lumen. Plays an important role in the cytoprotection of epithelial surfaces and are used as tumor markers in a variety of cancers. May play a role in epithelial organogenesis. {ECO:0000269|PubMed:10209489, ECO:0000269|PubMed:103304…	NA	mucin 6, oligomeric mucus/gel-forming
CIB3	-1.17	1	-0.28	1	117286	CIB3	NA	KIP3	calcium and integrin binding family member 3
TTC21A	-1.17	1	-0.27	1	199223	TTC21A	NA	STI2;IFT139A	tetratricopeptide repeat domain 21A
FAM92B	-1.17	1	-0.22	1	339145	FAM92B	May play a role in ciliogenesis (By similarity). In cooperation with CBY1 may facilitate ciliogenesis likely by the recruitment and fusion of endosomal vesicles at distal appendages during early stages of ciliogenesis (PubMed:27528616). {ECO:0000250|UniProtKB:A1XBS5, ECO:0000269|PubMed:27528616}.	FLJ44299	family with sequence similarity 92 member B
SLC7A13	-1.17	1	-0.17	1	157724	SLC7A13	Mediates the transport L-aspartate and L-glutamate in a sodium-independent manner. {ECO:0000250}.	AGT-1;XAT2	solute carrier family 7 member 13
LIG4	-1.17	1	-0.1	1	3981	LIG4	Efficiently joins single-strand breaks in a double- stranded polydeoxynucleotide in an ATP-dependent reaction. Involved in DNA non-homologous end joining (NHEJ) required for double-strand break repair and V(D)J recombination. The LIG4-XRCC4 complex is responsible for the NHEJ ligation step, and XRCC4 enhances the joining activity of LIG4. Binding of the LIG4-XRCC4 complex to DNA ends is dependent…	NA	DNA ligase 4
SIL1	-1.17	1	-0.02	1	64374	SIL1	Required for protein translocation and folding in the endoplasmic reticulum (ER). Functions as a nucleotide exchange factor for the ER lumenal chaperone HSPA5. {ECO:0000269|PubMed:12356756}.	BAP;ULG5;MSS	SIL1 nucleotide exchange factor
ESAM	-1.17	1	0.14	1	90952	ESAM	Can mediate aggregation most likely through a homophilic molecular interaction. {ECO:0000250}.	W117m	endothelial cell adhesion molecule
SESTD1	-1.17	1	0.2	1	91404	SESTD1	May act as the primary docking protein directing membrane turnover and assembly of the transient receptor potential channels TRPC4 and TRPC5. Binds phospholipids such as phosphatidylinositol monophosphates, phosphatidylinositol diphosphates (PIP2s) and phosphatidic acid, but not less polar lipids including phosphatidylcholine, phosphatidylserine, and phosphatidylinositol. The binding to PIP2s is …	DKFZp434O0515;Solo	SEC14 and spectrin domain containing 1
HIST1H4F	-1.17	1	0.37	1	8361	HIST1H4F	Core component of nucleosome. Nucleosomes wrap and compact DNA into chromatin, limiting DNA accessibility to the cellular machineries which require DNA as a template. Histones thereby play a central role in transcription regulation, DNA repair, DNA replication and chromosomal stability. DNA accessibility is regulated via a complex set of post-translational modifications of histones, also called h…	H4/c;H4;H4FC	histone cluster 1 H4 family member f
DGCR8	-1.16	1	-1.14	1	54487	DGCR8	Component of the microprocessor complex that acts as a RNA- and heme-binding protein that is involved in the initial step of microRNA (miRNA) biogenesis. Component of the microprocessor complex that is required to process primary miRNA transcripts (pri-miRNAs) to release precursor miRNA (pre-miRNA) in the nucleus. Within the microprocessor complex, DGCR8 function as a molecular anchor necessary f…	DGCRK6;Gy1;pasha;C22orf12	DGCR8, microprocessor complex subunit
CSN1S1	-1.16	1	-0.81	1	1446	CSN1S1	Important role in the capacity of milk to transport calcium phosphate.	CASA;CSN1	casein alpha s1
MCOLN3	-1.16	1	-0.8	1	55283	MCOLN3	Nonselective ligand-gated cation channel probably playing a role in the regulation of membrane trafficking events. Acts as Ca(2+)-permeable cation channel with inwardly rectifying activity (PubMed:18369318, PubMed:19497048, PubMed:19522758, PubMed:19885840, PubMed:29106414). Mediates release of Ca(2+) from endosomes to the cytoplasm, contributes to endosomal acidification and is involved in the r…	TRPML3;FLJ11006;TRP-ML3	mucolipin 3
SDR16C5	-1.16	1	-0.78	1	195814	SDR16C5	Oxidoreductase with strong preference for NAD. Active in both the oxidative and reductive directions. Oxidizes all-trans- retinol in all-trans-retinaldehyde. No activity was detected with 11-cis-retinol or 11-cis-retinaldehyde as substrates with either NAD(+)/NADH or NADP(+)/NADPH. {ECO:0000269|PubMed:18926804}.	RDHE2;RDH-E2;EPHD-2	short chain dehydrogenase/reductase family 16C member 5
DSCC1	-1.16	1	-0.75	1	79075	DSCC1	Loads PCNA onto primed templates regulating velocity, spacing and restart activity of replication forks. May couple DNA replication to sister chromatid cohesion through regulation of the acetylation of the cohesin subunit SMC3. {ECO:0000269|PubMed:12766176, ECO:0000269|PubMed:19907496}.	DCC1;hDCC1;MGC5528	DNA replication and sister chromatid cohesion 1
OR5K4	-1.16	1	-0.63	1	403278	OR5K4	Odorant receptor. {ECO:0000305}.	NA	olfactory receptor family 5 subfamily K member 4
CCDC34	-1.16	1	-0.54	1	91057	CCDC34	NA	NY-REN-41;L15;RAMA3	coiled-coil domain containing 34
FANCC	-1.16	1	-0.47	1	2176	FANCC	DNA repair protein that may operate in a postreplication repair or a cell cycle checkpoint function. May be implicated in interstrand DNA cross-link repair and in the maintenance of normal chromosome stability. Upon IFNG induction, may facilitate STAT1 activation by recruiting STAT1 to IFNGR1. {ECO:0000269|PubMed:11520787}.	FAC;FA3;FACC	FA complementation group C
CD300E	-1.16	1	-0.42	1	342510	CD300E	Probably acts as an activating receptor. {ECO:0000269|PubMed:15557162}.	IREM2;CLM2;CD300LE	CD300e molecule
SLC9A3R2	-1.16	1	-0.42	1	9351	SLC9A3R2	Scaffold protein that connects plasma membrane proteins with members of the ezrin/moesin/radixin family and thereby helps to link them to the actin cytoskeleton and to regulate their surface expression. Necessary for cAMP-mediated phosphorylation and inhibition of SLC9A3 (PubMed:18829453). May also act as scaffold protein in the nucleus. {ECO:0000269|PubMed:10455146, ECO:0000269|PubMed:18829453, …	SIP-1;TKA-1;NHERF-2;E3KARP	SLC9A3 regulator 2
SOGA1	-1.16	1	-0.4	1	140710	SOGA1	Regulates autophagy by playing a role in the reduction of glucose production in an adiponectin- and insulin-dependent manner. {ECO:0000250}.	dJ132F21.1;FLJ44670;SOGA;C20orf117;KIAA0889	suppressor of glucose, autophagy associated 1
NOD1	-1.16	1	-0.34	1	10392	NOD1	Enhances caspase-9-mediated apoptosis. Induces NF-kappa- B activity via RIPK2 and IKK-gamma. Confers responsiveness to intracellular bacterial lipopolysaccharides (LPS). Forms an intracellular sensing system along with ARHGEF2 for the detection of microbial effectors during cell invasion by pathogens. Required for RHOA and RIPK2 dependent NF-kappa-B signaling pathway activation upon S.flexneri ce…	NLRC1;CLR7.1;CARD4	nucleotide binding oligomerization domain containing 1
TMEM158	-1.16	1	-0.3	1	25907	TMEM158	Receptor for brain injury-derived neurotrophic peptide (BINP), a synthetic 13-mer peptide. {ECO:0000250}.	RIS1;p40BBp	transmembrane protein 158 (gene/pseudogene)
ZSCAN21	-1.16	1	-0.25	1	7589	ZSCAN21	Strong transcriptional activator. {ECO:0000250}.	DKFZp434L134;NY-REN-21;Zipro1;ZNF38	zinc finger and SCAN domain containing 21
TIMD4	-1.16	1	-0.23	1	91937	TIMD4	Phosphatidylserine receptor that enhances the engulfment of apoptotic cells. Involved in regulating T-cell proliferation and lymphotoxin signaling. Ligand for HAVCR1/TIMD1 (By similarity). {ECO:0000250}.	NA	T cell immunoglobulin and mucin domain containing 4
CASK	-1.16	1	-0.16	1	8573	CASK	Multidomain scaffolding protein with a role in synaptic transmembrane protein anchoring and ion channel trafficking. Contributes to neural development and regulation of gene expression via interaction with the transcription factor TBR1. Binds to cell-surface proteins, including amyloid precursor protein, neurexins and syndecans. May mediate a link between the extracellular matrix and the actin cy…	LIN2;CAGH39;FGS4;TNRC8	calcium/calmodulin dependent serine protein kinase
ZNF620	-1.16	1	-0.14	1	253639	ZNF620	May be involved in transcriptional regulation.	MGC50836	zinc finger protein 620
LMBR1	-1.16	1	-0.05	1	64327	LMBR1	Putative membrane receptor.	ACHP;FLJ11665;ZRS;C7orf2	limb development membrane protein 1
ZIM2	-1.16	1	-0.03	1	23619	ZIM2	May be involved in transcriptional regulation.	ZNF656	zinc finger imprinted 2
DDX19B	-1.16	1	0.01	1	11269	DDX19B	ATP-dependent RNA helicase involved in mRNA export from the nucleus. Rather than unwinding RNA duplexes, DDX19B functions as a remodeler of ribonucleoprotein particles, whereby proteins bound to nuclear mRNA are dissociated and replaced by cytoplasmic mRNA binding proteins.	DBP5;DDX19	DEAD-box helicase 19B
EGLN3	-1.16	1	0.2	1	112399	EGLN3	Cellular oxygen sensor that catalyzes, under normoxic conditions, the post-translational formation of 4-hydroxyproline in hypoxia-inducible factor (HIF) alpha proteins. Hydroxylates a specific proline found in each of the oxygen-dependent degradation (ODD) domains (N-terminal, NODD, and C-terminal, CODD) of HIF1A. Also hydroxylates HIF2A. Has a preference for the CODD site for both HIF1A and HIF2…	PHD3;HIFPH3	egl-9 family hypoxia inducible factor 3
SPHK1	-1.16	1	0.29	1	8877	SPHK1	Catalyzes the phosphorylation of sphingosine to form sphingosine 1-phosphate (SPP), a lipid mediator with both intra- and extracellular functions. Also acts on D-erythro- sphingosine and to a lesser extent sphinganine, but not other lipids, such as D,L-threo-dihydrosphingosine, N,N- dimethylsphingosine, diacylglycerol, ceramide, or phosphatidylinositol. {ECO:0000269|PubMed:20577214, ECO:0000269|P…	SPHK	sphingosine kinase 1
RFWD3	-1.16	1	0.31	1	55159	RFWD3	E3 ubiquitin-protein ligase required for the repair of DNA interstrand cross-links (ICL) in response to DNA damage (PubMed:21504906, PubMed:21558276, PubMed:26474068, PubMed:28575657, PubMed:28575658). Plays a key role in RPA- mediated DNA damage signaling and repair (PubMed:21504906, PubMed:21558276, PubMed:26474068, PubMed:28575657, PubMed:28575658). Acts by mediating ubiquitination of the RPA …	FLJ10520;RNF201;FANCW	ring finger and WD repeat domain 3
TCF20	-1.16	1	0.47	1	6942	TCF20	Transcriptional activator that binds to the regulatory region of MMP3 and thereby controls stromelysin expression. It stimulates the activity of various transcriptional activators such as JUN, SP1, PAX6 and ETS1, suggesting a function as a coactivator.	AR1;SPBP	transcription factor 20
DCPS	-1.16	1	0.79	1	28960	DCPS	Decapping scavenger enzyme that catalyzes the cleavage of a residual cap structure following the degradation of mRNAs by the 3'->5' exosome-mediated mRNA decay pathway. Hydrolyzes cap analog structures like 7-methylguanosine nucleoside triphosphate (m7GpppG) with up to 10 nucleotide substrates (small capped oligoribonucleotides) and specifically releases 5'-phosphorylated RNA fragments and 7-meth…	HSPC015;HINT-5;HSL1	decapping enzyme, scavenger
UBIAD1	-1.15	1	-1.24	1	29914	UBIAD1	Prenyltransferase that mediates the formation of menaquinone-4 (MK-4) and coenzyme Q10. MK-4 is a vitamin K2 isoform present at high concentrations in the brain, kidney and pancreas, and is required for endothelial cell development. Mediates the conversion of phylloquinone (PK) into MK-4, probably by cleaving the side chain of phylloquinone (PK) to release 2- methyl-1,4-naphthoquinone (menadione;…	TERE1;SCCD	UbiA prenyltransferase domain containing 1
ARID3B	-1.15	1	-1.2	1	10620	ARID3B	Transcription factor which may be involved in neuroblastoma growth and malignant transformation. Favors nuclear targeting of ARID3A. {ECO:0000269|PubMed:16951138, ECO:0000269|PubMed:17400556}.	BDP;DRIL2	AT-rich interaction domain 3B
ADORA3	-1.15	1	-0.78	1	140	ADORA3	Isoform 2: Receptor for adenosine. The activity of this receptor is mediated by G proteins which inhibits adenylyl cyclase (PubMed:8234299). {ECO:0000269|PubMed:8234299}.	AD026	adenosine A3 receptor
C8orf87	-1.15	1	-0.73	1	389676	NA	NA	NA	NA
PBXIP1	-1.15	1	-0.63	1	57326	PBXIP1	Regulator of pre-B-cell leukemia transcription factors (BPXs) function. Inhibits the binding of PBX1-HOX complex to DNA and blocks the transcriptional activity of E2A-PBX1. Tethers estrogen receptor-alpha (ESR1) to microtubules and allows them to influence estrogen receptors-alpha signaling. {ECO:0000269|PubMed:10825160, ECO:0000269|PubMed:12360403, ECO:0000269|PubMed:17043237}.	HPIP	PBX homeobox interacting protein 1
BMP5	-1.15	1	-0.62	1	653	BMP5	Induces cartilage and bone formation.	NA	bone morphogenetic protein 5
CNOT8	-1.15	1	-0.55	1	9337	CNOT8	Has 3'-5' poly(A) exoribonuclease activity for synthetic poly(A) RNA substrate. Its function seems to be partially redundant with that of CNOT7. Catalytic component of the CCR4-NOT complex which is linked to various cellular processes including bulk mRNA degradation, miRNA-mediated repression, translational repression during translational initiation and general transcription regulation. During mi…	CAF1;hCAF1;CALIF;POP2	CCR4-NOT transcription complex subunit 8
GLTP	-1.15	1	-0.51	1	51228	GLTP	Accelerates the intermembrane transfer of various glycolipids. Catalyzes the transfer of various glycosphingolipids between membranes but does not catalyze the transfer of phospholipids. May be involved in the intracellular translocation of glucosylceramides. {ECO:0000269|PubMed:15329726, ECO:0000269|PubMed:15504043, ECO:0000269|PubMed:17980653, ECO:0000269|PubMed:18261224}.	NA	glycolipid transfer protein
CARD14	-1.15	1	-0.31	1	79092	CARD14	Acts as a scaffolding protein that can activate the inflammatory transcription factor NF-kappa-B and p38/JNK MAP kinase signaling pathways. Forms a signaling complex with BCL10 and MALT1, and activates MALT1 proteolytic activity and inflammatory gene expression. MALT1 is indispensable for CARD14- induced activation of NF-kappa-B and p38/JNK MAP kinases (PubMed:11278692, PubMed:21302310, PubMed:27…	CARMA2;BIMP2;PSORS2	caspase recruitment domain family member 14
PASK	-1.15	1	-0.21	1	23178	PASK	Serine/threonine-protein kinase involved in energy homeostasis and protein translation. Phosphorylates EEF1A1, GYS1, PDX1 and RPS6. Probably plays a role under changing environmental conditions (oxygen, glucose, nutrition), rather than under standard conditions. Acts as a sensor involved in energy homeostasis: regulates glycogen synthase synthesis by mediating phosphorylation of GYS1, leading to …	PASKIN;KIAA0135;STK37	PAS domain containing serine/threonine kinase
OTOL1	-1.15	1	-0.18	1	131149	OTOL1	NA	C1QTNF15;C1QTNF16	otolin 1
C2orf15	-1.15	1	-0.04	1	150590	C2orf15	NA	MGC29762	chromosome 2 open reading frame 15
NPFFR1	-1.15	1	0.11	1	64106	NPFFR1	Receptor for NPAF (A-18-F-amide) and NPFF (F-8-F-amide) neuropeptides, also known as morphine-modulating peptides. Can also be activated by a variety of naturally occurring or synthetic FMRF-amide like ligands. This receptor mediates its action by association with G proteins that activate a phosphatidylinositol- calcium second messenger system.	OT7T022;NPFF1R1;GPR147	neuropeptide FF receptor 1
TFF1	-1.15	1	0.23	1	7031	TFF1	Stabilizer of the mucous gel overlying the gastrointestinal mucosa that provides a physical barrier against various noxious agents. May inhibit the growth of calcium oxalate crystals in urine. {ECO:0000269|PubMed:16308573}.	D21S21;HPS2;pS2;pNR-2;HP1.A;BCEI	trefoil factor 1
MAGEB17	-1.15	1	0.29	1	645864	MAGEB17	NA	NA	MAGE family member B17
KNDC1	-1.15	1	0.51	1	85442	KNDC1	RAS-Guanine nucleotide exchange factor (GEF) that controls the negative regulation of neuronal dendrite growth by mediating a signaling pathway linking RAS and MAP2 (By similarity). May be involved in cellular senescence (PubMed:24788352). {ECO:0000250|UniProtKB:Q0KK55, ECO:0000269|PubMed:24788352}.	KIAA1768;bB439H18.3;FLJ25027;Very-KIND;v-KIND;RASGEF2;C10orf23	kinase non-catalytic C-lobe domain containing 1
SPATA17	-1.15	1	0.73	1	128153	SPATA17	NA	IQCH	spermatogenesis associated 17
STK3	-1.15	1	0.74	1	6788	STK3	Stress-activated, pro-apoptotic kinase which, following caspase-cleavage, enters the nucleus and induces chromatin condensation followed by internucleosomal DNA fragmentation. Key component of the Hippo signaling pathway which plays a pivotal role in organ size control and tumor suppression by restricting proliferation and promoting apoptosis. The core of this pathway is composed of a kinase casc…	MST2;KRS1	serine/threonine kinase 3
STK36	-1.14	1	-1.55	1	27148	STK36	Serine/threonine protein kinase which plays an important role in the sonic hedgehog (Shh) pathway by regulating the activity of GLI transcription factors (PubMed:10806483). Controls the activity of the transcriptional regulators GLI1, GLI2 and GLI3 by opposing the effect of SUFU and promoting their nuclear localization (PubMed:10806483). GLI2 requires an additional function of STK36 to become tra…	KIAA1278;FU	serine/threonine kinase 36
TMED7-TICAM2	-1.14	1	-1.49	1	100302736	NA	Potential role in vesicular protein trafficking, mainly in the early secretory pathway. Appears to play a role in the biosynthesis of secreted cargo including processing and post- translational modifications.	NA	NA
SPC24	-1.14	1	-1	1	147841	SPC24	Acts as a component of the essential kinetochore- associated NDC80 complex, which is required for chromosome segregation and spindle checkpoint activity (PubMed:14738735). Required for kinetochore integrity and the organization of stable microtubule binding sites in the outer plate of the kinetochore (PubMed:14738735). The NDC80 complex synergistically enhances the affinity of the SKA1 complex fo…	FLJ90806;SPBC24	SPC24, NDC80 kinetochore complex component
FRMD4A	-1.14	1	-0.97	1	55691	FRMD4A	Scaffolding protein that regulates epithelial cell polarity by connecting ARF6 activation with the PAR3 complex (By similarity). Plays a redundant role with FRMD4B in epithelial polarization (By similarity). May regulate MAPT secretion by activating ARF6-signaling (PubMed:27044754). {ECO:0000250|UniProtKB:Q8BIE6, ECO:0000269|PubMed:27044754}.	FLJ10210;KIAA1294;bA295P9.4;FRMD4	FERM domain containing 4A
OR4X2	-1.14	1	-0.93	1	119764	OR4X2	Odorant receptor. {ECO:0000305}.	NA	olfactory receptor family 4 subfamily X member 2 (gene/pseudogene)
DNASE1L3	-1.14	1	-0.86	1	1776	DNASE1L3	Has DNA hydrolytic activity. Is capable of both single- and double-stranded DNA cleavage, producing DNA fragments with 3'-OH ends (By similarity). Can cleave chromatin to nucleosomal units and cleaves nucleosomal and liposome-coated DNA (PubMed:9070308, PubMed:9714828, PubMed:14646506, PubMed:10807908, PubMed:27293190). Acts in internucleosomal DNA fragmentation (INDF) during apoptosis and necros…	DNAS1L3;LSD	deoxyribonuclease 1 like 3
GFRA3	-1.14	1	-0.77	1	2676	GFRA3	Receptor for the glial cell line-derived neurotrophic factor, ARTN (artemin). Mediates the artemin-induced autophosphorylation and activation of the RET receptor tyrosine kinase. {ECO:0000269|PubMed:9883723}.	GFRa-3	GDNF family receptor alpha 3
KIAA0319L	-1.14	1	-0.6	1	79932	KIAA0319L	Possible role in axon guidance through interaction with RTN4R. {ECO:0000269|PubMed:20697954}.	KIAA1837;AAVR	KIAA0319 like
KRT38	-1.14	1	-0.53	1	8687	KRT38	NA	KRTHA8	keratin 38
SLC25A35	-1.14	1	-0.39	1	399512	SLC25A35	NA	FLJ40217	solute carrier family 25 member 35
RNF19B	-1.14	1	-0.36	1	127544	RNF19B	E3 ubiquitin-protein ligase which accepts ubiquitin from E2 ubiquitin-conjugating enzymes UBE2L3 and UBE2L6 in the form of a thioester and then directly transfers the ubiquitin to targeted substrates, such as UCKL1 (PubMed:16709802, PubMed:27485036). Involved in the cytolytic activity of natural killer cells and cytotoxic T-cells (PubMed:10438909). Protects against staurosporin-induced cell death…	FLJ90005;IBRDC3	ring finger protein 19B
MORF4L1	-1.14	1	-0.29	1	10933	MORF4L1	Component of the NuA4 histone acetyltransferase (HAT) complex which is involved in transcriptional activation of select genes principally by acetylation of nucleosomal histones H4 and H2A. This modification may both alter nucleosome - DNA interactions and promote interaction of the modified histones with other proteins which positively regulate transcription. This complex may be required for the …	MRG15;MORFRG15;HsT17725;Eaf3;MEAF3	mortality factor 4 like 1
PML	-1.14	1	-0.28	1	5371	PML	Functions via its association with PML-nuclear bodies (PML-NBs) in a wide range of important cellular processes, including tumor suppression, transcriptional regulation, apoptosis, senescence, DNA damage response, and viral defense mechanisms. Acts as the scaffold of PML-NBs allowing other proteins to shuttle in and out, a process which is regulated by SUMO-mediated modifications and interactions…	MYL;TRIM19;RNF71	promyelocytic leukemia
NELFE	-1.14	1	-0.27	1	7936	NELFE	Essential component of the NELF complex, a complex that negatively regulates the elongation of transcription by RNA polymerase II. The NELF complex, which acts via an association with the DSIF complex and causes transcriptional pausing, is counteracted by the P-TEFb kinase complex. The NELF complex is involved in HIV-1 latency possibly involving recruitment of PCF11 to paused RNA polymerase II. P…	RD;D6S45;NELF-E;RDP;RDBP	negative elongation factor complex member E
CDK5R1	-1.14	1	-0.16	1	8851	CDK5R1	p35 is a neuron specific activator of CDK5. The complex p35/CDK5 is required for neurite outgrowth and cortical lamination. Involved in dendritic spine morphogenesis by mediating the EFNA1-EPHA4 signaling. Activator of TPKII. The complex p35/CDK5 participates in the regulation of the circadian clock by modulating the function of CLOCK protein: phosphorylates CLOCK at 'Thr-451' and 'Thr-461' and r…	p35nck5a;Nck5a;p35	cyclin dependent kinase 5 regulatory subunit 1
FAM83A	-1.14	1	-0.16	1	84985	FAM83A	Probable proto-oncogene that functions in the epidermal growth factor receptor/EGFR signaling pathway. Activates both RAS/MAPK and PI3K/AKT/TOR signaling cascades downstream of EGFR. Required for the RAS/MAPK signaling cascade activation upon EGFR stimulation, it also activates both signaling cascades independently of EGFR activation. {ECO:0000269|PubMed:22886303}.	MGC14128;BJ-TSA-9	family with sequence similarity 83 member A
SMARCA2	-1.14	1	-0.15	1	6595	SMARCA2	Involved in transcriptional activation and repression of select genes by chromatin remodeling (alteration of DNA-nucleosome topology). Component of SWI/SNF chromatin remodeling complexes that carry out key enzymatic activities, changing chromatin structure by altering DNA-histone contacts within a nucleosome in an ATP-dependent manner. Binds DNA non-specifically (PubMed:22952240, PubMed:26601204)…	BAF190;hSNF2a;hBRM;Sth1p;SNF2LA;BRM;SNF2;SWI2;SNF2L2	SWI/SNF related, matrix associated, actin dependent regulator of chromatin, subfamily a, member 2
ZNF414	-1.14	1	-0.13	1	84330	ZNF414	May be involved in transcriptional regulation.	MGC15716;Zfp414	zinc finger protein 414
RPRML	-1.14	1	0.03	1	388394	RPRML	NA	MGC43894	reprimo like
TET2	-1.14	1	0.04	1	54790	TET2	Dioxygenase that catalyzes the conversion of the modified genomic base 5-methylcytosine (5mC) into 5- hydroxymethylcytosine (5hmC) and plays a key role in active DNA demethylation. Has a preference for 5-hydroxymethylcytosine in CpG motifs. Also mediates subsequent conversion of 5hmC into 5- formylcytosine (5fC), and conversion of 5fC to 5-carboxylcytosine (5caC). Conversion of 5mC into 5hmC, 5fC…	FLJ20032;KIAA1546	tet methylcytosine dioxygenase 2
FAM109B	-1.14	1	0.12	1	150368	PHETA2	Plays a role in endocytic trafficking. Required for receptor recycling from endosomes, both to the trans-Golgi network and the plasma membrane. {ECO:0000269|PubMed:21233288}.	DKFZp686J07229;SES2;IPIP27B;FAM109B	PH domain containing endocytic trafficking adaptor 2
FNIP1	-1.14	1	0.14	1	96459	FNIP1	Acts as a co-chaperone of HSP90AA1. Inhibits the ATPase activity of HSP90AA1 leading to reduction in its chaperone activity. Facilitates the binding of client protein FLCN to HSP90AA1. Competes with the activating co-chaperone AHSA1 for binding to HSP90AA1, thereby providing a reciprocal regulatory mechanism for chaperoning of client proteins (PubMed:27353360). May be involved in energy and/or nu…	KIAA1961	folliculin interacting protein 1
BRMS1	-1.14	1	0.6	1	25855	BRMS1	Transcriptional repressor. Down-regulates transcription activation by NF-kappa-B by promoting the deacetylation of RELA at 'Lys-310'. Promotes HDAC1 binding to promoter regions. Down- regulates expression of anti-apoptotic genes that are controlled by NF-kappa-B. Promotes apoptosis in cells that have inadequate adherence to a substrate, a process called anoikis, and may thereby inhibit metastasis…	DKFZP564A063	BRMS1, transcriptional repressor and anoikis regulator
CENPC	-1.14	1	0.97	1	1060	CENPC	Component of the CENPA-NAC (nucleosome-associated) complex, a complex that plays a central role in assembly of kinetochore proteins, mitotic progression and chromosome segregation. The CENPA-NAC complex recruits the CENPA-CAD (nucleosome distal) complex and may be involved in incorporation of newly synthesized CENPA into centromeres. CENPC recruits DNA methylation and DNMT3B to both centromeric a…	CENP-C;hcp-4;MIF2;CENPC1	centromere protein C
CHAF1A	-1.14	1	2.43	0.194	10036	CHAF1A	Core component of the CAF-1 complex, a complex thought to mediate chromatin assembly in DNA replication and DNA repair. Assembles histone octamers onto replicating DNA in vitro. CAF-1 performs the first step of the nucleosome assembly process, bringing newly synthesized histones H3 and H4 to replicating DNA; histones H2A/H2B can bind to this chromatin precursor subsequent to DNA replication to co…	CAF1P150;CAF1B;CAF-1;CAF1;P150;MGC71229	chromatin assembly factor 1 subunit A
KAT7	-1.13	1	-2.02	0.468	11143	KAT7	Component of the HBO1 complex which has a histone H4- specific acetyltransferase activity, a reduced activity toward histone H3 and is responsible for the bulk of histone H4 acetylation in vivo. Involved in H3K14 (histone H3 lysine 14) acetylation and cell proliferation (By similarity). Through chromatin acetylation it may regulate DNA replication and act as a coactivator of TP53-dependent transc…	HBOA;HBO1;ZC2HC7;MYST2	lysine acetyltransferase 7
EIF2S1	-1.13	1	-1.66	1	1965	EIF2S1	Functions in the early steps of protein synthesis by forming a ternary complex with GTP and initiator tRNA. This complex binds to a 40S ribosomal subunit, followed by mRNA binding to form a 43S pre-initiation complex. Junction of the 60S ribosomal subunit to form the 80S initiation complex is preceded by hydrolysis of the GTP bound to eIF-2 and release of an eIF-2- GDP binary complex. In order fo…	EIF-2alpha;EIF2A;EIF2	eukaryotic translation initiation factor 2 subunit alpha
APBA1	-1.13	1	-1.4	1	320	APBA1	Putative function in synaptic vesicle exocytosis by binding to Munc18-1, an essential component of the synaptic vesicle exocytotic machinery. May modulate processing of the amyloid-beta precursor protein (APP) and hence formation of APP- beta.	D9S411E;X11;MINT1	amyloid beta precursor protein binding family A member 1
ZNF623	-1.13	1	-1.28	1	9831	ZNF623	May be involved in transcriptional regulation.	KIAA0628	zinc finger protein 623
NPRL3	-1.13	1	-1.22	1	8131	NPRL3	As a component of the GATOR1 complex functions as an inhibitor of the amino acid-sensing branch of the TORC1 pathway. The GATOR1 complex strongly increases GTP hydrolysis by RRAGA and RRAGB within RRAGC-containing heterodimers, thereby deactivating RRAGs, releasing mTORC1 from lysosomal surface and inhibiting mTORC1 signaling. The GATOR1 complex is negatively regulated by GATOR2 the other GATOR s…	CGTHBA;RMD11;NPR3;MARE;HS-40;C16orf35	NPR3 like, GATOR1 complex subunit
FAM212A	-1.13	1	-0.67	1	389119	INKA1	Inhibitor of the serine/threonine-protein kinase PAK4 (PubMed:26607847). Acts by binding PAK4 in a substrate-like manner, inhibiting the protein kinase activity (PubMed:26607847). {ECO:0000269|PubMed:26607847}.	C3orf54;FAM212A	inka box actin regulator 1
PATE1	-1.13	1	-0.6	1	160065	PATE1	NA	PATE	prostate and testis expressed 1
CHD1	-1.13	1	-0.53	1	1105	CHD1	ATP-dependent chromatin-remodeling factor which functions as substrate recognition component of the transcription regulatory histone acetylation (HAT) complex SAGA. Regulates polymerase II transcription. Also required for efficient transcription by RNA polymerase I, and more specifically the polymerase I transcription termination step. Regulates negatively DNA replication. Not only involved in tr…	NA	chromodomain helicase DNA binding protein 1
HELZ	-1.13	1	-0.5	1	9931	HELZ	May act as a helicase that plays a role in RNA metabolism in multiple tissues and organs within the developing embryo.	KIAA0054;HUMORF5;DHRC	helicase with zinc finger
CHMP6	-1.13	1	-0.49	1	79643	CHMP6	Probable core component of the endosomal sorting required for transport complex III (ESCRT-III) which is involved in multivesicular bodies (MVBs) formation and sorting of endosomal cargo proteins into MVBs. MVBs contain intraluminal vesicles (ILVs) that are generated by invagination and scission from the limiting membrane of the endosome and mostly are delivered to lysosomes enabling degradation …	FLJ11749;VPS20	charged multivesicular body protein 6
IFT74	-1.13	1	-0.49	1	80173	IFT74	Component of the intraflagellar transport (IFT) complex B: together with IFT81, forms a tubulin-binding module that specifically mediates transport of tubulin within the cilium. Binds beta-tubulin via its basic region. Required for ciliogenesis. {ECO:0000269|PubMed:23990561}.	CMG1;CMG-1;FLJ22621;CCDC2	intraflagellar transport 74
TRAF3IP1	-1.13	1	-0.38	1	26146	TRAF3IP1	Plays an inhibitory role on IL13 signaling by binding to IL13RA1. Involved in suppression of IL13-induced STAT6 phosphorylation, transcriptional activity and DNA-binding. Recruits TRAF3 and DISC1 to the microtubules. Involved in kidney development and epithelial morphogenesis. Involved in the regulation of microtubule cytoskeleton organization. Is a negative regulator of microtubule stability, ac…	MIP-T3;DKFZP434F124;MIPT3;IFT54	TRAF3 interacting protein 1
NXF3	-1.13	1	-0.37	1	56000	NXF3	May function as a tissue-specific nuclear mRNA export factor.	NA	nuclear RNA export factor 3
ATRNL1	-1.13	1	-0.26	1	26033	ATRNL1	May play a role in melanocortin signaling pathways that regulate energy homeostasis. {ECO:0000250}.	KIAA0534;FLJ45344;ALP	attractin like 1
C7orf49	-1.13	1	-0.11	1	78996	CYREN	Isoform 1: Cell-cycle-specific inhibitor of classical non-homologous end joining (NHEJ) of DNA double-strand break (DSB) repair during the S and G2 phases (PubMed:28959974). Acts as a regulator of DNA repair pathway choice by specifically inhibiting classical NHEJ during the S and G2 phases, thereby promoting error-free repair by homologous recombination during cell cycle phases when sister chrom…	MGC5242;FLJ27285;FLJ22450;MRI;MRI-2;C7orf49	cell cycle regulator of NHEJ
EXD3	-1.13	1	-0.1	1	54932	EXD3	Possesses 3'-5' exoribonuclease activity. Required for 3'-end trimming of AGO1-bound miRNAs (By similarity). {ECO:0000250}.	LOC54932;FLJ20433;mut-7	exonuclease 3'-5' domain containing 3
PRDX3	-1.13	1	-0.09	1	10935	PRDX3	Thiol-specific peroxidase that catalyzes the reduction of hydrogen peroxide and organic hydroperoxides to water and alcohols, respectively. Plays a role in cell protection against oxidative stress by detoxifying peroxides (PubMed:7733872, PubMed:17707404). Acts synergistically with MAP3K13 to regulate the activation of NF-kappa-B in the cytosol (PubMed:12492477). {ECO:0000269|PubMed:12492477, ECO…	MER5;AOP-1;SP-22;AOP1	peroxiredoxin 3
CAPN5	-1.13	1	-0.07	1	726	CAPN5	Calcium-regulated non-lysosomal thiol-protease. {ECO:0000250}.	nCL-3;HTRA3;ADNIV;VRNI	calpain 5
ALKBH2	-1.13	1	0	1	121642	ALKBH2	Dioxygenase that repairs alkylated DNA and RNA containing 1-methyladenine and 3-methylcytosine by oxidative demethylation. Can also repair alkylated DNA containing 1- ethenoadenine (in vitro). Has strong preference for double- stranded DNA. Has low efficiency with single-stranded substrates. Requires molecular oxygen, alpha-ketoglutarate and iron. {ECO:0000269|PubMed:12486230, ECO:0000269|PubMed:…	MGC90512;ABH2	alkB homolog 2, alpha-ketoglutarate dependent dioxygenase
MTMR4	-1.13	1	0.06	1	9110	MTMR4	Dephosphorylates proteins phosphorylated on Ser, Thr, and Tyr residues and low molecular weight phosphatase substrate para-nitrophenylphosphate. Phosphorylates phosphatidylinositol 3,4,5-trisphosphate (PIP3). {ECO:0000269|PubMed:11302699}.	KIAA0647;ZFYVE11	myotubularin related protein 4
IFNA8	-1.13	1	0.47	1	3445	IFNA8	Produced by macrophages, IFN-alpha have antiviral activities. Interferon stimulates the production of two enzymes: a protein kinase and an oligoadenylate synthetase.	IFN-alphaB	interferon alpha 8
CDK2AP1	-1.13	1	0.7	1	8099	CDK2AP1	specific inhibitor of the cell-cycle kinase CDK2. {ECO:0000250}.	DORC1;doc-1;DOC1;ST19;p12DOC-1	cyclin dependent kinase 2 associated protein 1
CEP164	-1.13	1	0.87	1	22897	CEP164	Plays a role in microtubule organization and/or maintenance for the formation of primary cilia (PC), a microtubule-based structure that protrudes from the surface of epithelial cells. Plays a critical role in G2/M checkpoint and nuclear divisions. A key player in the DNA damage-activated ATR/ATM signaling cascade since it is required for the proper phosphorylation of H2AX, RPA, CHEK2 and CHEK1. P…	KIAA1052;NPHP15	centrosomal protein 164
SEC11A	-1.12	1	-1.18	1	23478	SEC11A	Component of the microsomal signal peptidase complex which removes signal peptides from nascent proteins as they are translocated into the lumen of the endoplasmic reticulum. {ECO:0000250}.	SPC18;sid2895;SPCS4A;SEC11L1	SEC11 homolog A, signal peptidase complex subunit
ZNF217	-1.12	1	-1.13	1	7764	ZNF217	Binds to the promoters of target genes and functions as repressor. Promotes cell proliferation and antagonizes cell death. Promotes phosphorylation of AKT1 at 'Ser-473'. {ECO:0000269|PubMed:16203743, ECO:0000269|PubMed:16940172, ECO:0000269|PubMed:17259635, ECO:0000269|PubMed:18625718}.	ZABC1	zinc finger protein 217
NFRKB	-1.12	1	-1.02	1	4798	NFRKB	Binds to the DNA consensus sequence 5'-GGGGAATCTCC-3'. {ECO:0000269|PubMed:18922472}.	DKFZp547B2013;INO80G	nuclear factor related to kappaB binding protein
CENPT	-1.12	1	-0.96	1	80152	CENPT	Component of the CENPA-NAC (nucleosome-associated) complex, a complex that plays a central role in assembly of kinetochore proteins, mitotic progression and chromosome segregation. The CENPA-NAC complex recruits the CENPA-CAD (nucleosome distal) complex and may be involved in incorporation of newly synthesized CENPA into centromeres. Part of a nucleosome- associated complex that binds specificall…	FLJ13111;CENP-T;C16orf56	centromere protein T
S100B	-1.12	1	-0.81	1	6285	S100B	Weakly binds calcium but binds zinc very tightly- distinct binding sites with different affinities exist for both ions on each monomer. Physiological concentrations of potassium ion antagonize the binding of both divalent cations, especially affecting high-affinity calcium-binding sites. Binds to and initiates the activation of STK38 by releasing autoinhibitory intramolecular interactions within …	S100beta	S100 calcium binding protein B
MFSD9	-1.12	1	-0.73	1	84804	MFSD9	NA	MGC11332	major facilitator superfamily domain containing 9
MAB21L1	-1.12	1	-0.64	1	4081	MAB21L1	Putative nucleotidyltransferase required for several aspects of embryonic development including normal development of the eye (By similarity). It is unclear whether it displays nucleotidyltransferase activity in vivo (PubMed:27271801). Binds single-stranded RNA (ssRNA) (PubMed:27271801). {ECO:0000250|UniProtKB:O70299, ECO:0000269|PubMed:27271801}.	CAGR1	mab-21 like 1
TCHP	-1.12	1	-0.56	1	84260	TCHP	Tumor suppressor which has the ability to inhibit cell growth and be pro-apoptotic during cell stress. Inhibits cell growth in bladder and prostate cancer cells by a down-regulation of HSPB1 by inhibiting its phosphorylation. May act as a 'capping' or 'branching' protein for keratin filaments in the cell periphery. May regulate K8/K18 filament and desmosome organization mainly at the apical or pe…	MGC10854;TpMs	trichoplein keratin filament binding
PSMC6	-1.12	1	-0.47	1	5706	PSMC6	Component of the 26S proteasome, a multiprotein complex involved in the ATP-dependent degradation of ubiquitinated proteins. This complex plays a key role in the maintenance of protein homeostasis by removing misfolded or damaged proteins, which could impair cellular functions, and by removing proteins whose functions are no longer required. Therefore, the proteasome participates in numerous cell…	p42	proteasome 26S subunit, ATPase 6
CENPP	-1.12	1	-0.41	1	401541	CENPP	Component of the CENPA-CAD (nucleosome distal) complex, a complex recruited to centromeres which is involved in assembly of kinetochore proteins, mitotic progression and chromosome segregation. May be involved in incorporation of newly synthesized CENPA into centromeres via its interaction with the CENPA-NAC complex. {ECO:0000269|PubMed:16622420}.	RP11-19J3.3;CENP-P	centromere protein P
SH2D2A	-1.12	1	-0.39	1	9047	SH2D2A	Could be a T-cell-specific adapter protein involved in the control of T-cell activation. May play a role in the CD4-p56- LCK-dependent signal transduction pathway. Could also play an important role in normal and pathological angiogenesis. Could be an adapter protein that facilitates and regulates interaction of KDR with effector proteins important to endothelial cell survival and proliferation.	TSAd;F2771	SH2 domain containing 2A
GTF2I	-1.12	1	-0.38	1	2969	GTF2I	Interacts with the basal transcription machinery by coordinating the formation of a multiprotein complex at the C-FOS promoter, and linking specific signal responsive activator complexes. Promotes the formation of stable high-order complexes of SRF and PHOX1 and interacts cooperatively with PHOX1 to promote serum-inducible transcription of a reporter gene deriven by the C- FOS serum response elem…	TFII-I;BAP-135;SPIN;BTKAP1;DIWS;IB291;WBSCR6	general transcription factor IIi
FAM78A	-1.12	1	-0.37	1	286336	FAM78A	NA	FLJ00024;C9orf59	family with sequence similarity 78 member A
IGF2R	-1.12	1	-0.34	1	3482	IGF2R	Transport of phosphorylated lysosomal enzymes from the Golgi complex and the cell surface to lysosomes. Lysosomal enzymes bearing phosphomannosyl residues bind specifically to mannose-6- phosphate receptors in the Golgi apparatus and the resulting receptor-ligand complex is transported to an acidic prelyosomal compartment where the low pH mediates the dissociation of the complex. This receptor al…	CD222;MPRI;MPR1;CIMPR;M6P-R;CI-M6PR;CI-MPR;MPR300	insulin like growth factor 2 receptor
C6orf201	-1.12	1	-0.29	1	404220	C6orf201	NA	dJ1013A10.5	chromosome 6 open reading frame 201
SLC1A3	-1.12	1	-0.28	1	6507	SLC1A3	Sodium-dependent, high-affinity amino acid transporter that mediates the uptake of L-glutamate and also L-aspartate and D-aspartate (PubMed:7521911, PubMed:8123008, PubMed:20477940, PubMed:26690923, PubMed:28032905, PubMed:28424515). Functions as a symporter that transports one amino acid molecule together with two or three Na(+) ions and one proton, in parallel with the counter-transport of one …	EAAT1;GLAST;EA6	solute carrier family 1 member 3
NUDT8	-1.12	1	-0.22	1	254552	NUDT8	Probably mediates the hydrolysis of some nucleoside diphosphate derivatives. {ECO:0000250}.	FLJ41567	nudix hydrolase 8
SDF4	-1.12	1	-0.17	1	51150	SDF4	May regulate calcium-dependent activities in the endoplasmic reticulum lumen or post-ER compartment. {ECO:0000250}.	Cab45	stromal cell derived factor 4
OTUD1	-1.12	1	-0.15	1	220213	OTUD1	Deubiquitinating enzyme that specifically hydrolyzes 'Lys-63'-linked polyubiquitin to monoubiquitin. {ECO:0000269|PubMed:23827681}.	DUBA7;OTDC1	OTU deubiquitinase 1
NXPE4	-1.12	1	-0.08	1	54827	NXPE4	NA	FLJ20127;C11orf33;FAM55D	neurexophilin and PC-esterase domain family member 4
AKAP17A	-1.12	1	0.08	1	8227	AKAP17A	Splice factor regulating alternative splice site selection for certain mRNA precursors. Mediates regulation of pre- mRNA splicing in a PKA-dependent manner. {ECO:0000269|PubMed:16982639, ECO:0000269|PubMed:19840947}.	XE7;XE7Y;DXYS155E;MGC39904;721P;CCDC133;CXYorf3;SFRS17A	A-kinase anchoring protein 17A
SPARC	-1.12	1	0.2	1	6678	SPARC	Appears to regulate cell growth through interactions with the extracellular matrix and cytokines. Binds calcium and copper, several types of collagen, albumin, thrombospondin, PDGF and cell membranes. There are two calcium binding sites; an acidic domain that binds 5 to 8 Ca(2+) with a low affinity and an EF-hand loop that binds a Ca(2+) ion with a high affinity.	ON	secreted protein acidic and cysteine rich
OR5AC2	-1.12	1	0.32	1	81050	OR5AC2	Odorant receptor. {ECO:0000305}.	HSA1	olfactory receptor family 5 subfamily AC member 2
PGBD5	-1.12	1	0.35	1	79605	PGBD5	Transposase that mediates sequence-specific genomic rearrangements (PubMed:26406119, PubMed:28504702). Can induce genomic rearrangements that inactivate the HPRT1 gene (PubMed:27491780). {ECO:0000269|PubMed:26406119, ECO:0000269|PubMed:27491780, ECO:0000269|PubMed:28504702}.	DKFZp761A0620;FLJ11413	piggyBac transposable element derived 5
CCL2	-1.12	1	0.38	1	6347	CCL2	Chemotactic factor that attracts monocytes and basophils but not neutrophils or eosinophils. Augments monocyte anti-tumor activity. Has been implicated in the pathogenesis of diseases characterized by monocytic infiltrates, like psoriasis, rheumatoid arthritis or atherosclerosis. May be involved in the recruitment of monocytes into the arterial wall during the disease process of atherosclerosis.	MCP1;MCP-1;MCAF;SMC-CF;GDCF-2;HC11;MGC9434;SCYA2	C-C motif chemokine ligand 2
ASPRV1	-1.12	1	0.42	1	151516	ASPRV1	NA	Taps;SASPase;FLJ25084	aspartic peptidase retroviral like 1
HSBP1	-1.12	1	0.47	1	3281	HSBP1	Negative regulator of the heat shock response. Negatively affects HSF1 DNA-binding activity. May have a role in the suppression of the activation of the stress response during the aging process.	NA	heat shock factor binding protein 1
UBASH3B	-1.12	1	0.5	1	84959	UBASH3B	Interferes with CBL-mediated down-regulation and degradation of receptor-type tyrosine kinases. Promotes accumulation of activated target receptors, such as T-cell receptors and EGFR, on the cell surface. Exhibits tyrosine phosphatase activity toward several substrates including EGFR, FAK, SYK, and ZAP70. Down-regulates proteins that are dually modified by both protein tyrosine phosphorylation an…	KIAA1959;STS-1;TULA2;TULA-2	ubiquitin associated and SH3 domain containing B
SHROOM4	-1.12	1	0.7	1	57477	SHROOM4	Probable regulator of cytoskeletal architecture that plays an important role in development. May regulate cellular and cytoskeletal architecture by modulating the spatial distribution of myosin II (By similarity). {ECO:0000250, ECO:0000269|PubMed:16684770}.	KIAA1202	shroom family member 4
WBP11	-1.12	1	1.06	1	51729	WBP11	Activates pre-mRNA splicing. May inhibit PP1 phosphatase activity. {ECO:0000269|PubMed:10593949, ECO:0000269|PubMed:11375989, ECO:0000269|PubMed:14640981}.	NPWBP;SIPP1;PPP1R165	WW domain binding protein 11
OR2L8	-1.11	1	-1.03	1	391190	OR2L8	Odorant receptor. {ECO:0000305}.	NA	olfactory receptor family 2 subfamily L member 8 (gene/pseudogene)
HIST1H2AH	-1.11	1	-0.91	1	85235	HIST1H2AH	Core component of nucleosome. Nucleosomes wrap and compact DNA into chromatin, limiting DNA accessibility to the cellular machineries which require DNA as a template. Histones thereby play a central role in transcription regulation, DNA repair, DNA replication and chromosomal stability. DNA accessibility is regulated via a complex set of post-translational modifications of histones, also called h…	H2AFALii;dJ86C11.1;H2A/S	histone cluster 1 H2A family member h
ARSJ	-1.11	1	-0.62	1	79642	ARSJ	NA	FLJ23548	arylsulfatase family member J
OTUD6B	-1.11	1	-0.49	1	51633	OTUD6B	NA	CGI-77;DUBA5	OTU domain containing 6B
GYPC	-1.11	1	-0.21	1	2995	GYPC	This protein is a minor sialoglycoprotein in human erythrocyte membranes. The blood group Gerbich antigens and receptors for Plasmodium falciparum merozoites are most likely located within the extracellular domain. Glycophorin-C plays an important role in regulating the stability of red cells.	GPC;GYPD;Ge;CD236;CD236R	glycophorin C (Gerbich blood group)
SEC13	-1.11	1	-0.14	1	6396	SEC13	Functions as a component of the nuclear pore complex (NPC) and the COPII coat. At the endoplasmic reticulum, SEC13 is involved in the biogenesis of COPII-coated vesicles. {ECO:0000269|PubMed:8972206}.	SEC13R;npp-20;D3S1231E;SEC13L1	SEC13 homolog, nuclear pore and COPII coat complex component
EFCAB13	-1.11	1	0.09	1	124989	EFCAB13	NA	FLJ40342;C17orf57	EF-hand calcium binding domain 13
CLDN20	-1.11	1	0.4	1	49861	CLDN20	Plays a major role in tight junction-specific obliteration of the intercellular space, through calcium- independent cell-adhesion activity. {ECO:0000250}.	NA	claudin 20
TCP10L	-1.11	1	0.45	1	140290	TCP10L	May be involved in transcriptional regulation. Has in vitro transcription inhibition activity. Acts as a tumor suppressor in hepatocellular carcinoma (HCC) cells. {ECO:0000269|PubMed:14586771, ECO:0000269|PubMed:24565846}.	PRED77	t-complex 10 like
DCHS1	-1.11	1	0.46	1	8642	DCHS1	Calcium-dependent cell-adhesion protein. Mediates functions in neuroprogenitor cell proliferation and differentiation. In the heart, has a critical role for proper morphogenesis of the mitral valve, acting in the regulation of cell migration involved in valve formation (PubMed:26258302). {ECO:0000269|PubMed:26258302}.	FIB1;KIAA1773;FLJ11790;CDHR6;CDH25;PCDH16	dachsous cadherin-related 1
MUM1L1	-1.11	1	0.51	1	139221	PWWP3B	NA	FLJ33516;MUM1L1	PWWP domain containing 3B
PABPC1L2B	-1.11	1	0.86	1	645974	PABPC1L2B	NA	RBM32B	poly(A) binding protein cytoplasmic 1 like 2B
PABPC1L2A	-1.11	1	0.86	1	340529	PABPC1L2A	NA	RBM32A	poly(A) binding protein cytoplasmic 1 like 2A
OR5R1	-1.11	1	0.95	1	219479	OR5R1	Odorant receptor. {ECO:0000305}.	OR5R1P	olfactory receptor family 5 subfamily R member 1 (gene/pseudogene)
PTPN23	-1.1	1	-1.57	1	25930	PTPN23	Plays a role in sorting of endocytic ubiquitinated cargos into multivesicular bodies (MVBs) via its interaction with the ESCRT-I complex (endosomal sorting complex required for transport I), and possibly also other ESCRT complexes. May act as a negative regulator of Ras-mediated mitogenic activity. Plays a role in ciliogenesis. {ECO:0000269|PubMed:18434552, ECO:0000269|PubMed:20393563, ECO:000026…	DKFZP564F0923;KIAA1471;HD-PTP	protein tyrosine phosphatase, non-receptor type 23
DIO3	-1.1	1	-1.08	1	1735	DIO3	Responsible for the deiodination of T4 (3,5,3',5'- tetraiodothyronine) into RT3 (3,3',5'-triiodothyronine) and of T3 (3,5,3'-triiodothyronine) into T2 (3,3'-diiodothyronine). RT3 and T2 are inactive metabolites. May play a role in preventing premature exposure of developing fetal tissues to adult levels of thyroid hormones. Can regulate circulating fetal thyroid hormone concentrations throughout …	TXDI3	iodothyronine deiodinase 3
DCTN4	-1.1	1	-0.99	1	51164	DCTN4	Could have a dual role in dynein targeting and in ACTR1A/Arp1 subunit of dynactin pointed-end capping. Could be involved in ACTR1A pointed-end binding and in additional roles in linking dynein and dynactin to the cortical cytoskeleton.	NA	dynactin subunit 4
TCL1B	-1.1	1	-0.84	1	9623	TCL1B	Enhances the phosphorylation and activation of AKT1 and AKT2. {ECO:0000269|PubMed:10983986}.	TML1	T cell leukemia/lymphoma 1B
NDRG4	-1.1	1	-0.75	1	65009	NDRG4	Contributes to the maintenance of intracerebral BDNF levels within the normal range, which is necessary for the preservation of spatial learning and the resistance to neuronal cell death caused by ischemic stress (By similarity). May enhance growth factor-induced ERK1 and ERK2 phosphorylation, including that induced by PDGF and FGF. May attenuate NGF-promoted ELK1 phosphorylation in a microtubule…	KIAA1180;SMAP-8	NDRG family member 4
B4GALNT3	-1.1	1	-0.67	1	283358	B4GALNT3	Transfers N-acetylgalactosamine (GalNAc) from UDP-GalNAc to N-acetylglucosamine-beta-benzyl with a beta-1,4-linkage to form N,N'-diacetyllactosediamine, GalNAc-beta-1,4-GlcNAc structures in N-linked glycans and probably O-linked glycans. Mediates the N,N'- diacetyllactosediamine formation on gastric mucosa. {ECO:0000269|PubMed:16728562}.	B4GalNac-T3;FLJ16224;FLJ40362	beta-1,4-N-acetyl-galactosaminyltransferase 3
LHFPL4	-1.1	1	-0.54	1	375323	LHFPL4	NA	GARLH4	LHFPL tetraspan subfamily member 4
CPNE6	-1.1	1	-0.41	1	9362	CPNE6	Calcium-dependent phospholipid-binding protein that plays a role in calcium-mediated intracellular processes. Binds phospholipid membranes in a calcium-dependent manner (By similarity). Plays a role in dendrite formation by melanocytes (PubMed:23999003). {ECO:0000250|UniProtKB:Q9Z140, ECO:0000269|PubMed:23999003}.	NA	copine 6
IGBP1	-1.1	1	-0.39	1	3476	IGBP1	Associated to surface IgM-receptor; may be involved in signal transduction. Involved in regulation of the catalytic activity of the phosphatases PP2A, PP4 and PP6 by protecting their partially folded catalytic subunits from degradative polyubiquitination until they associate with regulatory subunits. {ECO:0000269|PubMed:19818709, ECO:0000269|PubMed:23591866}.	IBP1	immunoglobulin binding protein 1
CRHR1	-1.1	1	-0.33	1	1394	CRHR1	G-protein coupled receptor for CRH (corticotropin- releasing factor) and UCN (urocortin). Has high affinity for CRH and UCN. Ligand binding causes a conformation change that triggers signaling via guanine nucleotide-binding proteins (G proteins) and down-stream effectors, such as adenylate cyclase. Promotes the activation of adenylate cyclase, leading to increased intracellular cAMP levels. Inhib…	CRF-R;CRF1;CRHR	corticotropin releasing hormone receptor 1
FRMD4B	-1.1	1	-0.3	1	23150	FRMD4B	Member of GRP1 signaling complexes that are acutely recruited to plasma membrane ruffles in response to insulin receptor signaling. May function as a scaffolding protein that regulates epithelial cell polarity by connecting ARF6 activation with the PAR3 complex. Plays a redundant role with FRMD4A in epithelial polarization. {ECO:0000250|UniProtKB:Q920B0}.	KIAA1013;GRSP1	FERM domain containing 4B
VIPR1	-1.1	1	-0.04	1	7433	VIPR1	This is a receptor for VIP. The activity of this receptor is mediated by G proteins which activate adenylyl cyclase. The affinity is VIP = PACAP-27 > PACAP-38. {ECO:0000269|PubMed:8926282}.	VPAC1;RDC1;HVR1;VPAC1R	vasoactive intestinal peptide receptor 1
N4BP2L2	-1.1	1	0.03	1	10443	N4BP2L2	NA	CG005;PFAAP5	NEDD4 binding protein 2 like 2
ZC3H6	-1.1	1	0.07	1	376940	ZC3H6	NA	FLJ41410;FLJ45877;KIAA2035;ZC3HDC6	zinc finger CCCH-type containing 6
XKR9	-1.1	1	0.1	1	389668	XKR9	NA	NA	XK related 9
KCNG3	-1.1	1	0.11	1	170850	KCNG3	Potassium channel subunit that does not form functional channels by itself (PubMed:11852086). Can form functional heterotetrameric channels with KCNB1; this promotes a reduction in the rate of activation and inactivation of the delayed rectifier voltage-gated potassium channel KCNB1 (PubMed:11852086, PubMed:19074135). {ECO:0000269|PubMed:11852086, ECO:0000269|PubMed:19074135}.	Kv6.3	potassium voltage-gated channel modifier subfamily G member 3
EAF1	-1.1	1	0.52	1	85403	EAF1	Acts as a transcriptional transactivator of ELL and ELL2 elongation activities. {ECO:0000269|PubMed:11418481, ECO:0000269|PubMed:16006523}.	NA	ELL associated factor 1
POLR2K	-1.1	1	0.54	1	5440	POLR2K	DNA-dependent RNA polymerase catalyzes the transcription of DNA into RNA using the four ribonucleoside triphosphates as substrates. Common component of RNA polymerases I, II and III which synthesize ribosomal RNA precursors, mRNA precursors and many functional non-coding RNAs, and a small RNAs, such as 5S rRNA and tRNAs, respectively.	RPB10alpha	RNA polymerase II subunit K
RANBP2	-1.1	1	0.7	1	5903	RANBP2	E3 SUMO-protein ligase which facilitates SUMO1 and SUMO2 conjugation by UBE2I. Involved in transport factor (Ran-GTP, karyopherin)-mediated protein import via the F-G repeat-containing domain which acts as a docking site for substrates. Binds single- stranded RNA (in vitro). May bind DNA. Component of the nuclear export pathway. Specific docking site for the nuclear export factor exportin-1. Sumo…	NUP358;ADANE;ANE1	RAN binding protein 2
DSN1	-1.1	1	0.8	1	79980	DSN1	Part of the MIS12 complex which is required for normal chromosome alignment and segregation and kinetochore formation during mitosis. {ECO:0000269|PubMed:15502821, ECO:0000269|PubMed:16585270}.	dJ469A13.2;MIS13;KNL3;hKNL-3;C20orf172	DSN1 homolog, MIS12 kinetochore complex component
OGT	-1.1	1	0.85	1	8473	OGT	Catalyzes the transfer of a single N-acetylglucosamine from UDP-GlcNAc to a serine or threonine residue in cytoplasmic and nuclear proteins resulting in their modification with a beta- linked N-acetylglucosamine (O-GlcNAc) (PubMed:26678539). Glycosylates a large and diverse number of proteins including histone H2B, AKT1, EZH2, PFKL, KMT2E/MLL5, MAPT/TAU and HCFC1 (PubMed:26678539). Can regulate t…	O-GLCNAC;HRNT1;MGC22921;FLJ23071;OGT1	O-linked N-acetylglucosamine (GlcNAc) transferase
C10orf12	-1.09	1	-1.47	1	84458	LCOR	May act as transcription activator that binds DNA elements with the sequence 5'-CCCTATCGATCGATCTCTACCT-3' (By similarity). Repressor of ligand-dependent transcription activation by target nuclear receptors. Repressor of ligand- dependent transcription activation by ESR1, ESR2, NR3C1, PGR, RARA, RARB, RARG, RXRA and VDR. {ECO:0000250, ECO:0000269|PubMed:12535528}.	MLR2;FLJ38026;KIAA1795;DKFZP564P1916;FLJ13022;C10orf12	ligand dependent nuclear receptor corepressor
ZNF774	-1.09	1	-1.04	1	342132	ZNF774	May be involved in transcriptional regulation. {ECO:0000250}.	MGC75360	zinc finger protein 774
PABPN1L	-1.09	1	-1.01	1	390748	PABPN1L	Binds the poly(A) tail of mRNA. {ECO:0000250}.	ePABP2	poly(A) binding protein nuclear 1 like, cytoplasmic
KCNH4	-1.09	1	-0.92	1	23415	KCNH4	Pore-forming (alpha) subunit of voltage-gated potassium channel. Elicits an outward current, but shows no inactivation. Channel properties may be modulated by cAMP and subunit assembly.	Kv12.3;elk1	potassium voltage-gated channel subfamily H member 4
TBC1D3K	-1.09	1	-0.89	1	101060351	TBC1D3K	Acts as a GTPase activating protein for RAB5. Does not act on RAB4 or RAB11 (By similarity). {ECO:0000250|UniProtKB:Q8IZP1}.	NA	TBC1 domain family member 3K
TBC1D3I	-1.09	1	-0.89	1	102724862	TBC1D3I	Acts as a GTPase activating protein for RAB5. Does not act on RAB4 or RAB11 (By similarity). {ECO:0000250|UniProtKB:Q8IZP1}.	NA	TBC1 domain family member 3I
TBC1D3E	-1.09	1	-0.89	1	102723859	TBC1D3E	Acts as a GTPase activating protein for RAB5. Does not act on RAB4 or RAB11 (By similarity). {ECO:0000250|UniProtKB:Q8IZP1}.	NA	TBC1 domain family member 3E
TBC1D3L	-1.09	1	-0.89	1	101060376	TBC1D3L	Acts as a GTPase activating protein for RAB5. Does not act on RAB4 or RAB11 (By similarity). {ECO:0000250|UniProtKB:Q8IZP1}.	NA	TBC1 domain family member 3L
CCDC27	-1.09	1	-0.71	1	148870	CCDC27	NA	FLJ32825	coiled-coil domain containing 27
MPEG1	-1.09	1	-0.53	1	219972	MPEG1	NA	MPG1	macrophage expressed 1
GHR	-1.09	1	-0.44	1	2690	GHR	Receptor for pituitary gland growth hormone involved in regulating postnatal body growth. On ligand binding, couples to the JAK2/STAT5 pathway (By similarity). {ECO:0000250}. Isoform 2 up-regulates the production of GHBP and acts as a negative inhibitor of GH signaling.	GHBP	growth hormone receptor
SLC29A3	-1.09	1	-0.35	1	55315	SLC29A3	Mediates both influx and efflux of nucleosides across the membrane (equilibrative transporter). Mediates transport of adenine, adenosine and uridine, as well as several nucleoside analog drugs, such as anticancer and antiviral agents, including cladribine, cordycepin, tubercidin and AZT. Does not transport hypoxanthine. {ECO:0000269|PubMed:15701636}.	ENT3;FLJ11160	solute carrier family 29 member 3
ZNF200	-1.09	1	-0.34	1	7752	ZNF200	Could have a role in spermatogenesis.	NA	zinc finger protein 200
BRSK2	-1.09	1	-0.13	1	9024	BRSK2	Serine/threonine-protein kinase that plays a key role in polarization of neurons and axonogenesis, cell cycle progress and insulin secretion. Phosphorylates CDK16, CDC25C, MAPT/TAU, PAK1 and WEE1. Following phosphorylation and activation by STK11/LKB1, acts as a key regulator of polarization of cortical neurons, probably by mediating phosphorylation of microtubule-associated proteins such as MAPT…	PEN11B;C11orf7;STK29	BR serine/threonine kinase 2
MICAL3	-1.09	1	-0.01	1	57553	MICAL3	Monooxygenase that promotes depolymerization of F-actin by mediating oxidation of specific methionine residues on actin to form methionine-sulfoxide, resulting in actin filament disassembly and preventing repolymerization. In the absence of actin, it also functions as a NADPH oxidase producing H(2)O(2). Seems to act as Rab effector protein and plays a role in vesicle trafficking. Involved in exoc…	KIAA0819	microtubule associated monooxygenase, calponin and LIM domain containing 3
GPR173	-1.09	1	0.02	1	54328	GPR173	Orphan receptor.	SREB3	G protein-coupled receptor 173
MPZ	-1.09	1	0.16	1	4359	MPZ	Is an adhesion molecule necessary for normal myelination in the peripheral nervous system. It mediates adhesion between adjacent myelin wraps and ultimately drives myelin compaction. {ECO:0000269|PubMed:10545037, ECO:0000269|PubMed:18337304}.	HMSNIB;CMT2I;CMT2J;CMT1;CMT1B	myelin protein zero
SERAC1	-1.09	1	0.2	1	84947	SERAC1	Plays an important role in the phosphatidylglycerol remodeling that is essential for both mitochondrial function and intracellular cholesterol trafficking. May catalyze the remodeling of phosphatidylglycerol and be involved in the transacylation- acylation reaction to produce phosphatidylglycerol-36:1. May be involved in bis(monoacylglycerol)phosphate biosynthetic pathway. {ECO:0000269|PubMed:226…	FLJ14917	serine active site containing 1
EIF5A2	-1.09	1	0.3	1	56648	EIF5A2	mRNA-binding protein involved in translation elongation. Has an important function at the level of mRNA turnover, probably acting downstream of decapping. Involved in actin dynamics and cell cycle progression, mRNA decay and probably in a pathway involved in stress response and maintenance of cell wall integrity. Functions as a regulator of apoptosis. Mediates effects of polyamines on neuronal pr…	NA	eukaryotic translation initiation factor 5A2
C22orf31	-1.09	1	0.55	1	25770	C22orf31	NA	HS747E2A;bK747E2.1	chromosome 22 open reading frame 31
ADAM29	-1.09	1	0.61	1	11086	ADAM29	May be involved in spermatogenesis and fertilization. Seems to be a non catalytic metalloprotease-like protein.	svph1;CT73	ADAM metallopeptidase domain 29
GABRR3	-1.09	1	0.69	1	200959	GABRR3	GABA, the major inhibitory neurotransmitter in the vertebrate brain, mediates neuronal inhibition by binding to the GABA/benzodiazepine receptor and opening an integral chloride channel. {ECO:0000250}.	NA	gamma-aminobutyric acid type A receptor rho3 subunit (gene/pseudogene)
CAD	-1.08	1	-1.39	1	790	CAD	This protein is a "fusion" protein encoding four enzymatic activities of the pyrimidine pathway (GATase, CPSase, ATCase and DHOase). {ECO:0000269|PubMed:24332717}.	GATD4	carbamoyl-phosphate synthetase 2, aspartate transcarbamylase, and dihydroorotase
PAFAH1B1	-1.08	1	-0.98	1	5048	PAFAH1B1	Required for proper activation of Rho GTPases and actin polymerization at the leading edge of locomoting cerebellar neurons and postmigratory hippocampal neurons in response to calcium influx triggered via NMDA receptors. Non-catalytic subunit of an acetylhydrolase complex which inactivates platelet- activating factor (PAF) by removing the acetyl group at the SN-2 position (By similarity). Positi…	LIS1;PAFAH;NudF;MDCR;MDS	platelet activating factor acetylhydrolase 1b regulatory subunit 1
MAGEB2	-1.08	1	-0.78	1	4113	MAGEB2	May enhance ubiquitin ligase activity of RING-type zinc finger-containing E3 ubiquitin-protein ligases. Proposed to act through recruitment and/or stabilization of the Ubl-conjugating enzyme (E2) at the E3:substrate complex. {ECO:0000269|PubMed:20864041}.	DAM6;MAGE-XP-2;MGC26438;CT3.2	MAGE family member B2
NDUFV3	-1.08	1	-0.75	1	4731	NDUFV3	Accessory subunit of the mitochondrial membrane respiratory chain NADH dehydrogenase (Complex I), that is believed not to be involved in catalysis. Complex I functions in the transfer of electrons from NADH to the respiratory chain. The immediate electron acceptor for the enzyme is believed to be ubiquinone. May be the terminally assembled subunit of Complex I. {ECO:0000269|PubMed:27626371}.	CI-10k	NADH:ubiquinone oxidoreductase subunit V3
STAT4	-1.08	1	-0.75	1	6775	STAT4	Carries out a dual function: signal transduction and activation of transcription. Involved in IL12 signaling.	NA	signal transducer and activator of transcription 4
FUT10	-1.08	1	-0.73	1	84750	FUT10	Probable fucosyltransferase. {ECO:0000250}.	NA	fucosyltransferase 10
UNC119	-1.08	1	-0.72	1	9094	UNC119	Involved in synaptic functions in photoreceptor cells, the signal transduction in immune cells as a Src family kinase activator, endosome recycling, the uptake of bacteria and endocytosis, protein trafficking in sensory neurons and as lipid- binding chaperone with specificity for a diverse subset of myristoylated proteins. Specifically binds the myristoyl moiety of a subset of N-terminally myrist…	HRG4;POC7;POC7A	unc-119 lipid binding chaperone
ZNF526	-1.08	1	-0.63	1	116115	ZNF526	May be involved in transcriptional regulation. {ECO:0000250}.	KIAA1951;MGC4267	zinc finger protein 526
WIPF1	-1.08	1	-0.52	1	7456	WIPF1	Plays a role in the reorganization of the actin cytoskeleton. Contributes with NCK1 and GRB2 in the recruitment and activation of WASL. May participate in regulating the subcellular localization of WASL, resulting in the disassembly of stress fibers in favor of filopodia formation. Plays a role in the formation of cell ruffles (By similarity). Plays an important role in the intracellular motility…	WIP;WASPIP	WAS/WASL interacting protein family member 1
NAF1	-1.08	1	-0.44	1	92345	NAF1	RNA-binding protein required for the maturation of box H/ACA snoRNPs complex and ribosome biogenesis. During assembly of the H/ACA snoRNPs complex, it associates with the complex and disappears during maturation of the complex and is replaced by NOLA1/GAR1 to yield mature H/ACA snoRNPs complex. Probably competes with NOLA1/GAR1 for binding with DKC1/NOLA4. {ECO:0000269|PubMed:16618814}.	NA	nuclear assembly factor 1 ribonucleoprotein
FNBP1	-1.08	1	-0.3	1	23048	FNBP1	May act as a link between RND2 signaling and regulation of the actin cytoskeleton (By similarity). Required to coordinate membrane tubulation with reorganization of the actin cytoskeleton during the late stage of clathrin-mediated endocytosis. Binds to lipids such as phosphatidylinositol 4,5-bisphosphate and phosphatidylserine and promotes membrane invagination and the formation of tubules. Also …	FBP17;KIAA0554	formin binding protein 1
TMEM55B	-1.08	1	-0.25	1	90809	PIP4P1	Catalyzes the hydrolysis of the 4-position phosphate of phosphatidylinositol 4,5-bisphosphate. Does not hydrolyze phosphatidylinositol 3,4,5-trisphosphate, phosphatidylinositol 3,4-bisphosphate, inositol 3,5-bisphosphate, inositol 3,4- bisphosphate, phosphatidylinositol 5-monophosphate, phosphatidylinositol 4-monophosphate and phosphatidylinositol 3- monophosphate. {ECO:0000269|PubMed:16365287}.	MGC26684;C14orf9;TMEM55B	phosphatidylinositol-4,5-bisphosphate 4-phosphatase 1
GABRA4	-1.08	1	-0.24	1	2557	GABRA4	GABA, the major inhibitory neurotransmitter in the vertebrate brain, mediates neuronal inhibition by binding to the GABA/benzodiazepine receptor and opening an integral chloride channel.	NA	gamma-aminobutyric acid type A receptor alpha4 subunit
SMARCAL1	-1.08	1	-0.24	1	50485	SMARCAL1	ATP-dependent annealing helicase that binds selectively to fork DNA relative to ssDNA or dsDNA and catalyzes the rewinding of the stably unwound DNA. Rewinds single-stranded DNA bubbles that are stably bound by replication protein A (RPA). Acts throughout the genome to reanneal stably unwound DNA, performing the opposite reaction of many enzymes, such as helicases and polymerases, that unwind DNA…	HHARP;HARP	SWI/SNF related, matrix associated, actin dependent regulator of chromatin, subfamily a like 1
GABBR2	-1.08	1	0	1	9568	GABBR2	Component of a heterodimeric G-protein coupled receptor for GABA, formed by GABBR1 and GABBR2 (PubMed:9872316, PubMed:9872744, PubMed:15617512, PubMed:18165688, PubMed:22660477, PubMed:24305054). Within the heterodimeric GABA receptor, only GABBR1 seems to bind agonists, while GABBR2 mediates coupling to G proteins (PubMed:18165688). Ligand binding causes a conformation change that triggers signa…	HG20;GABABR2;GPRC3B;GPR51	gamma-aminobutyric acid type B receptor subunit 2
HIST1H2BB	-1.08	1	0.3	1	3018	HIST1H2BB	Core component of nucleosome. Nucleosomes wrap and compact DNA into chromatin, limiting DNA accessibility to the cellular machineries which require DNA as a template. Histones thereby play a central role in transcription regulation, DNA repair, DNA replication and chromosomal stability. DNA accessibility is regulated via a complex set of post-translational modifications of histones, also called h…	H2B/f;H2BFF	histone cluster 1 H2B family member b
TLK2	-1.08	1	0.37	1	11011	TLK2	Serine/threonine-protein kinase involved in the process of chromatin assembly and probably also DNA replication, transcription, repair, and chromosome segregation. Phosphorylates the chromatin assembly factors ASF1A AND ASF1B. Phosphorylation of ASF1A prevents its proteasome-mediated degradation, thereby enhancing chromatin assembly. Negative regulator of amino acid starvation-induced autophagy. …	PKU-ALPHA;MGC44450	tousled like kinase 2
CCL16	-1.08	1	0.44	1	6360	CCL16	Shows chemotactic activity for lymphocytes and monocytes but not neutrophils. Also shows potent myelosuppressive activity, suppresses proliferation of myeloid progenitor cells. Recombinant SCYA16 shows chemotactic activity for monocytes and THP-1 monocytes, but not for resting lymphocytes and neutrophils. Induces a calcium flux in THP-1 cells that were desensitized by prior expression to RANTES.	NCC-4;SCYL4;LEC;HCC-4;LMC;LCC-1;CKb12;Mtn-1;SCYA16	C-C motif chemokine ligand 16
ARL8B	-1.08	1	0.51	1	55207	ARL8B	May play a role in lysosome motility (PubMed:16537643, PubMed:25898167). May play a role in chromosome segregation (PubMed:15331635). {ECO:0000269|PubMed:15331635, ECO:0000269|PubMed:16537643, ECO:0000269|PubMed:25898167}.	FLJ10702;Gie1;ARL10C	ADP ribosylation factor like GTPase 8B
HDAC8	-1.08	1	0.72	1	55869	HDAC8	Responsible for the deacetylation of lysine residues on the N-terminal part of the core histones (H2A, H2B, H3 and H4). Histone deacetylation gives a tag for epigenetic repression and plays an important role in transcriptional regulation, cell cycle progression and developmental events. Histone deacetylases act via the formation of large multiprotein complexes. Also involved in the deacetylation …	RPD3;HDACL1;WTS;MRXS6	histone deacetylase 8
GAK	-1.08	1	0.82	1	2580	GAK	Associates with cyclin G and CDK5. Seems to act as an auxilin homolog that is involved in the uncoating of clathrin- coated vesicles by Hsc70 in non-neuronal cells. Expression oscillates slightly during the cell cycle, peaking at G1. {ECO:0000269|PubMed:10625686}.	DNAJC26	cyclin G associated kinase
POLA2	-1.08	1	1.75	0.813	23649	POLA2	May play an essential role at the early stage of chromosomal DNA replication by coupling the polymerase alpha/primase complex to the cellular replication machinery. {ECO:0000250}.	FLJ21662	DNA polymerase alpha 2, accessory subunit
QDPR	-1.07	1	-1.09	1	5860	QDPR	The product of this enzyme, tetrahydrobiopterin (BH-4), is an essential cofactor for phenylalanine, tyrosine, and tryptophan hydroxylases.	DHPR;PKU2;SDR33C1	quinoid dihydropteridine reductase
PPWD1	-1.07	1	-1.05	1	23398	PPWD1	Putative peptidylprolyl isomerase (PPIase). PPIases accelerate the folding of proteins. It catalyzes the cis-trans isomerization of proline imidic peptide bonds in oligopeptides. May be involved in pre-mRNA splicing.	KIAA0073	peptidylprolyl isomerase domain and WD repeat containing 1
C4orf22	-1.07	1	-0.98	1	255119	CFAP299	NA	C4orf22	cilia and flagella associated protein 299
HPX	-1.07	1	-0.91	1	3263	HPX	Binds heme and transports it to the liver for breakdown and iron recovery, after which the free hemopexin returns to the circulation.	NA	hemopexin
MSGN1	-1.07	1	-0.76	1	343930	MSGN1	Involved in specifying the paraxial, but not dorsal, mesoderm. May regulate the expression of T-box transcription factors required for mesoderm formation and differentiation (By similarity). {ECO:0000250}.	pMesogenin1	mesogenin 1
PRKAG1	-1.07	1	-0.56	1	5571	PRKAG1	AMP/ATP-binding subunit of AMP-activated protein kinase (AMPK), an energy sensor protein kinase that plays a key role in regulating cellular energy metabolism. In response to reduction of intracellular ATP levels, AMPK activates energy-producing pathways and inhibits energy-consuming processes: inhibits protein, carbohydrate and lipid biosynthesis, as well as cell growth and proliferation. AMPK a…	NA	protein kinase AMP-activated non-catalytic subunit gamma 1
TBC1D7	-1.07	1	-0.54	1	51256	TBC1D7	Component of the TSC-TBC complex, that contains TBC1D7 in addition to the TSC1-TSC2 complex and consists of the functional complex possessing GTPase-activating protein (GAP) activity toward RHEB in response to alterations in specific cellular growth conditions. The small GTPase RHEB is a direct activator of the protein kinase activity of mTORC1 and the TSC-TBC complex acts as a negative regulator…	dJ257A7.3;FLJ32666	TBC1 domain family member 7
CTTN	-1.07	1	-0.42	1	2017	CTTN	Contributes to the organization of the actin cytoskeleton and cell shape (PubMed:21296879). Plays a role in the formation of lamellipodia and in cell migration. Plays a role in the regulation of neuron morphology, axon growth and formation of neuronal growth cones (By similarity). Through its interaction with CTTNBP2, involved in the regulation of neuronal spine density (By similarity). Plays a r…	EMS1	cortactin
CARF	-1.07	1	-0.38	1	79800	CARF	Acts as a transcriptional activator that mediates the calcium- and neuron-selective induction of BDNF exon III transcription. Binds to the consensus calcium-response element CaRE1 5'-CTATTTCGAG-3' sequence. {ECO:0000269|PubMed:11832226, ECO:0000269|PubMed:22174809}.	FLJ21579;CaRF;NYD-SP24;ALS2CR8	calcium responsive transcription factor
DBT	-1.07	1	-0.3	1	1629	DBT	The branched-chain alpha-keto dehydrogenase complex catalyzes the overall conversion of alpha-keto acids to acyl-CoA and CO(2). It contains multiple copies of three enzymatic components: branched-chain alpha-keto acid decarboxylase (E1), lipoamide acyltransferase (E2) and lipoamide dehydrogenase (E3). Within this complex, the catalytic function of this enzyme is to accept, and to transfer to coen…	NA	dihydrolipoamide branched chain transacylase E2
PLAGL1	-1.07	1	-0.2	1	5325	PLAGL1	Shows weak transcriptional activatory activity. Transcriptional regulator of the type 1 receptor for pituitary adenylate cyclase-activating polypeptide. {ECO:0000269|PubMed:18299245}.	ZAC;LOT1	PLAG1 like zinc finger 1
FICD	-1.07	1	-0.18	1	11153	FICD	Protein that can both mediate the addition of adenosine 5'-monophosphate (AMP) to specific residues of target proteins (AMPylation), and the removal of the same modification from target proteins (de-AMPylation), depending on the context (By similarity). The side chain of Glu-231 determines which of the two opposing activities (AMPylase or de-AMPylase) will take place (By similarity). Acts as a ke…	HYPE;HIP13	FIC domain containing
PAICS	-1.07	1	-0.07	1	10606	PAICS	NA	ADE2H1;AIRC;PAIS	phosphoribosylaminoimidazole carboxylase and phosphoribosylaminoimidazolesuccinocarboxamide synthase
TLK1	-1.07	1	0.16	1	9874	TLK1	NA	KIAA0137;PKU-BETA	tousled like kinase 1
DET1	-1.07	1	0.28	1	55070	DET1	Component of the E3 ubiquitin ligase DCX DET1-COP1 complex, which is required for ubiquitination and subsequent degradation of target proteins. The complex is involved in JUN ubiquitination and degradation. {ECO:0000269|PubMed:14739464}.	FLJ10103	DET1, COP1 ubiquitin ligase partner
AOAH	-1.07	1	0.7	1	313	AOAH	Removes the secondary (acyloxyacyl-linked) fatty acyl chains from the lipid A region of bacterial lipopolysaccharides (PubMed:1883828, PubMed:8089145). By breaking down LPS, terminates the host response to bacterial infection and prevents prolonged and damaging inflammatory responses (By similarity). In peritoneal macrophages, seems to be important for recovery from a state of immune tolerance fo…	NA	acyloxyacyl hydrolase
ADCY3	-1.06	1	-1.68	1	109	ADCY3	Catalyzes the formation of the signaling molecule cAMP in response to G-protein signaling. Participates in signaling cascades triggered by odorant receptors via its function in cAMP biosynthesis. Required for the perception of odorants. Required for normal sperm motility and normal male fertility. Plays a role in regulating insulin levels and body fat accumulation in response to a high fat diet. …	AC3	adenylate cyclase 3
OR5K1	-1.06	1	-1.52	1	26339	OR5K1	Odorant receptor. {ECO:0000305}.	HTPCRX10;HSHTPCRX10	olfactory receptor family 5 subfamily K member 1
AKR1C4	-1.06	1	-1.41	1	1109	AKR1C4	Catalyzes the transformation of the potent androgen dihydrotestosterone (DHT) into the less active form, 5-alpha- androstan-3-alpha,17-beta-diol (3-alpha-diol). Also has some 20- alpha-hydroxysteroid dehydrogenase activity. The biotransformation of the pesticide chlordecone (kepone) to its corresponding alcohol leads to increased biliary excretion of the pesticide and concomitant reduction of its…	DD4;HAKRA;C11;3-alpha-HSD;CDR;MGC22581;CHDR	aldo-keto reductase family 1 member C4
CEP63	-1.06	1	-0.99	1	80254	CEP63	Required for normal spindle assembly. Plays a key role in mother-centriole-dependent centriole duplication; the function seems also to involve CEP152, CDK5RAP2 and WDR62 through a stepwise assembled complex at the centrosome that recruits CDK2 required for centriole duplication. Reported to be required for centrosomal recruitment of CEP152; however, this function has been questioned (PubMed:21983…	FLJ13386	centrosomal protein 63
ALS2CL	-1.06	1	-0.98	1	259173	ALS2CL	Acts as a guanine nucleotide exchange factor (GEF) for Rab5 GTPase. Regulates the ALS2-mediated endosome dynamics. {ECO:0000269|PubMed:15388334, ECO:0000269|PubMed:16473597, ECO:0000269|PubMed:17239822}.	FLJ36525;RN49018;DKFZp686I0110	ALS2 C-terminal like
PCGF5	-1.06	1	-0.93	1	84333	PCGF5	Component of a Polycomb group (PcG) multiprotein PRC1- like complex, a complex class required to maintain the transcriptionally repressive state of many genes, including Hox genes, throughout development. PcG PRC1 complex acts via chromatin remodeling and modification of histones; it mediates monoubiquitination of histone H2A 'Lys-119', rendering chromatin heritably changed in its expressibility …	MGC16202;RNF159	polycomb group ring finger 5
KPNA7	-1.06	1	-0.77	1	402569	KPNA7	Functions in nuclear protein import. {ECO:0000250}.	IPOA8	karyopherin subunit alpha 7
FOXI1	-1.06	1	-0.69	1	2299	FOXI1	Transcriptional activator required for the development of normal hearing, sense of balance and kidney function. Required for the expression of SLC26A4/PDS, JAG1 and COCH in a subset of epithelial cells and the development of the endolymphatic system in the inner ear. Also required for the expression of SLC4A1/AE1, SLC4A9/AE4, ATP6V1B1 and the differentiation of intercalated cells in the epitheliu…	FREAC6;FKHL10	forkhead box I1
PKNOX2	-1.06	1	-0.55	1	63876	PKNOX2	NA	NA	PBX/knotted 1 homeobox 2
AADAT	-1.06	1	-0.54	1	51166	AADAT	Transaminase with broad substrate specificity. Has transaminase activity towards aminoadipate, kynurenine, methionine and glutamate. Shows activity also towards tryptophan, aspartate and hydroxykynurenine. Accepts a variety of oxo-acids as amino- group acceptors, with a preference for 2-oxoglutarate, 2- oxocaproic acid, phenylpyruvate and alpha-oxo-gamma-methiol butyric acid. Can also use glyoxyl…	KATII;KAT2;KYAT2	aminoadipate aminotransferase
TRMT61B	-1.06	1	-0.53	1	55006	TRMT61B	Methyltransferase that catalyzes the formation of N(1)- methyladenine at position 58 (m1A58) in various tRNAs in mitochondrion, including tRNA(Leu) (deciphering codons UUA or UUG), tRNA(Lys) and tRNA(Ser) (deciphering codons UCA, UCU, UCG or UCC) (PubMed:23097428). Catalyzes the formation of 1- methyladenosine at position 947 of mitochondrial 16S ribosomal RNA and this modification is most likely…	FLJ20628	tRNA methyltransferase 61B
DMGDH	-1.06	1	-0.49	1	29958	DMGDH	Catalyzes the demethylation of N,N-dimethylglycine to sarcosine. Also has activity with sarcosine in vitro. {ECO:0000269|PubMed:27486859}.	NA	dimethylglycine dehydrogenase
EI24	-1.06	1	-0.42	1	9538	EI24	Acts as a negative growth regulator via p53-mediated apoptosis pathway. Regulates formation of degradative autolysosomes during autophagy (By similarity). {ECO:0000250}.	PIG8;TP53I8;EPG4	EI24, autophagy associated transmembrane protein
LEPRE1	-1.06	1	-0.38	1	64175	P3H1	Basement membrane-associated chondroitin sulfate proteoglycan (CSPG). Has prolyl 3-hydroxylase activity catalyzing the post-translational formation of 3-hydroxyproline in -Xaa-Pro- Gly- sequences in collagens, especially types IV and V. May be involved in the secretory pathway of cells. Has growth suppressive activity in fibroblasts. {ECO:0000269|PubMed:10951563}.	GROS1;LEPRECAN;MGC117314;LEPRE1	prolyl 3-hydroxylase 1
HMCN1	-1.06	1	-0.34	1	83872	HMCN1	Promotes cleavage furrow maturation during cytokinesis in preimplantation embryos. May play a role in the architecture of adhesive and flexible epithelial cell junctions. May play a role during myocardial remodeling by imparting an effect on cardiac fibroblast migration. {ECO:0000250|UniProtKB:D3YXG0}.	FBLN6;FIBL6;FIBL-6;ARMD1	hemicentin 1
MIS18BP1	-1.06	1	-0.25	1	55320	MIS18BP1	Required for recruitment of CENPA to centromeres and normal chromosome segregation during mitosis. {ECO:0000269|PubMed:17199038, ECO:0000269|PubMed:17339379}.	M18BP1;FLJ11186;KIAA1903;KNL2;C14orf106	MIS18 binding protein 1
FAM192A	-1.06	1	-0.2	1	80011	FAM192A	NA	NIP30;PIP30;C16orf94	family with sequence similarity 192 member A
YWHAE	-1.06	1	-0.19	1	7531	YWHAE	Adapter protein implicated in the regulation of a large spectrum of both general and specialized signaling pathways. Binds to a large number of partners, usually by recognition of a phosphoserine or phosphothreonine motif. Binding generally results in the modulation of the activity of the binding partner (By similarity). Positively regulates phosphorylated protein HSF1 nuclear export to the cytop…	FLJ45465	tyrosine 3-monooxygenase/tryptophan 5-monooxygenase activation protein epsilon
HTR3A	-1.06	1	-0.14	1	3359	HTR3A	This is one of the several different receptors for 5- hydroxytryptamine (serotonin), a biogenic hormone that functions as a neurotransmitter, a hormone, and a mitogen. This receptor is a ligand-gated ion channel, which when activated causes fast, depolarizing responses in neurons. It is a cation-specific, but otherwise relatively nonselective, ion channel. {ECO:0000269|PubMed:12867984, ECO:000026…	5-HT3R;5-HT3A;HTR3	5-hydroxytryptamine receptor 3A
RPP25	-1.06	1	-0.13	1	54913	RPP25	Component of ribonuclease P, a protein complex that generates mature tRNA molecules by cleaving their 5'-ends. Also a component of RNase MRP. This subunit binds to RNA.	FLJ20374	ribonuclease P and MRP subunit p25
LLGL2	-1.06	1	-0.12	1	3993	LLGL2	Part of a complex with GPSM2/LGN, PRKCI/aPKC and PARD6B/Par-6, which may ensure the correct organization and orientation of bipolar spindles for normal cell division. This complex plays roles in the initial phase of the establishment of epithelial cell polarity. {ECO:0000269|PubMed:15632202}.	HGL;Hugl-2	LLGL scribble cell polarity complex component 2
OR5H14	-1.06	1	-0.1	1	403273	OR5H14	Odorant receptor. {ECO:0000305}.	NA	olfactory receptor family 5 subfamily H member 14
CLCN6	-1.06	1	-0.08	1	1185	CLCN6	Chloride transport protein, initially identified as voltage-gated chloride channel. The presence of the conserved gating glutamate residues suggests that is functions as antiporter.	CLC-6;KIAA0046;ClC-6	chloride voltage-gated channel 6
CRHR2	-1.06	1	0.13	1	1395	CRHR2	G-protein coupled receptor for CRH (corticotropin- releasing factor), UCN (urocortin), UCN2 and UCN3. Has high affinity for UCN. Ligand binding causes a conformation change that triggers signaling via guanine nucleotide-binding proteins (G proteins) and down-stream effectors, such as adenylate cyclase. Promotes the activation of adenylate cyclase, leading to increased intracellular cAMP levels.	CRF2;CRF-RB;HM-CRF	corticotropin releasing hormone receptor 2
NPM2	-1.06	1	0.15	1	10361	NPM2	Core histones chaperone involved in chromatin reprogramming, specially during fertilization and early embryonic development. Probably involved in sperm DNA decondensation during fertilization. {ECO:0000269|PubMed:21863821}.	NA	nucleophosmin/nucleoplasmin 2
PPARD	-1.06	1	0.17	1	5467	PPARD	Ligand-activated transcription factor. Receptor that binds peroxisome proliferators such as hypolipidemic drugs and fatty acids. Has a preference for poly-unsaturated fatty acids, such as gamma-linoleic acid and eicosapentanoic acid. Once activated by a ligand, the receptor binds to promoter elements of target genes. Regulates the peroxisomal beta-oxidation pathway of fatty acids. Functions as tr…	NUC1;NUCII;FAAR;NR1C2	peroxisome proliferator activated receptor delta
CHRNG	-1.06	1	0.38	1	1146	CHRNG	After binding acetylcholine, the AChR responds by an extensive change in conformation that affects all subunits and leads to opening of an ion-conducting channel across the plasma membrane.	ACHRG	cholinergic receptor nicotinic gamma subunit
TRIM52	-1.06	1	0.46	1	84851	TRIM52	NA	RNF102	tripartite motif containing 52
TAGAP	-1.06	1	0.66	1	117289	TAGAP	May function as a GTPase-activating protein and may play important roles during T-cell activation. {ECO:0000269|PubMed:15177553}.	FLJ32631;IDDM21;ARHGAP47	T cell activation RhoGTPase activating protein
TRAIP	-1.06	1	1.26	1	10293	TRAIP	E3 ubiquitin ligase acting as a negative regulator of innate immune signaling. Inhibits activation of NF-kappa-B mediated by TNF. Negatively regulates TLR3/4- and RIG-I-mediated IRF3 activation and subsequent IFNB1 production and cellular antiviral response by promoting 'Lys-48'-linked polyubiquitination of TNK1 leading to its proteasomal degradation (By similarity) (PubMed:22945920). Involved in…	TRIP;RNF206	TRAF interacting protein
KIF2A	-1.06	1	1.53	0.717	3796	KIF2A	Plus end-directed microtubule-dependent motor required for normal brain development. May regulate microtubule dynamics during axonal growth. Required for normal progression through mitosis. Required for normal congress of chromosomes at the metaphase plate. Required for normal spindle dynamics during mitosis. Promotes spindle turnover. Implicated in formation of bipolar mitotic spindles. Has micr…	HK2;KIF2	kinesin family member 2A
TINF2	-1.05	1	-1.99	0.926	26277	TINF2	Component of the shelterin complex (telosome) that is involved in the regulation of telomere length and protection. Shelterin associates with arrays of double-stranded TTAGGG repeats added by telomerase and protects chromosome ends; without its protective activity, telomeres are no longer hidden from the DNA damage surveillance and chromosome ends are inappropriately processed by DNA repair pathw…	TIN2	TERF1 interacting nuclear factor 2
PTEN	-1.05	1	-0.78	1	5728	PTEN	Tumor suppressor. Acts as a dual-specificity protein phosphatase, dephosphorylating tyrosine-, serine- and threonine- phosphorylated proteins. Also acts as a lipid phosphatase, removing the phosphate in the D3 position of the inositol ring from phosphatidylinositol 3,4,5-trisphosphate, phosphatidylinositol 3,4-diphosphate, phosphatidylinositol 3- phosphate and inositol 1,3,4,5-tetrakisphosphate w…	MMAC1;TEP1;PTEN1;BZS;MHAM	phosphatase and tensin homolog
UBR1	-1.05	1	-0.65	1	197131	UBR1	E3 ubiquitin-protein ligase which is a component of the N-end rule pathway. Recognizes and binds to proteins bearing specific N-terminal residues that are destabilizing according to the N-end rule, leading to their ubiquitination and subsequent degradation. May be involved in pancreatic homeostasis. Binds leucine and is a negative regulator of the leucine-mTOR signaling pathway, thereby controlli…	NA	ubiquitin protein ligase E3 component n-recognin 1
BAX	-1.05	1	-0.54	1	581	BAX	Plays a role in the mitochondrial apoptotic process. Under normal conditions, BAX is largely cytosolic via constant retrotranslocation from mitochondria to the cytosol mediated by BCL2L1/Bcl-xL, which avoids accumulation of toxic BAX levels at the mitochondrial outer membrane (MOM) (PubMed:21458670). Under stress conditions, undergoes a conformation change that causes translocation to the mitocho…	BCL2L4	BCL2 associated X, apoptosis regulator
KRT36	-1.05	1	-0.4	1	8689	KRT36	NA	KRTHA6	keratin 36
GZF1	-1.05	1	-0.32	1	64412	GZF1	Transcriptional repressor. Binds the GZF1 responsive element (GRE) (consensus: 5'-TGCGCN[TG][CA]TATA-3'). May be regulating VSX2/HOX10 expression. {ECO:0000269|PubMed:14522971, ECO:0000269|PubMed:16049025}.	dJ322G13.2;ZBTB23;ZNF336	GDNF inducible zinc finger protein 1
PNPO	-1.05	1	-0.18	1	55163	PNPO	Catalyzes the oxidation of either pyridoxine 5'- phosphate (PNP) or pyridoxamine 5'-phosphate (PMP) into pyridoxal 5'-phosphate (PLP). {ECO:0000269|PubMed:12824491}.	PDXPO	pyridoxamine 5'-phosphate oxidase
SDK2	-1.05	1	-0.16	1	54549	SDK2	Adhesion molecule that promotes lamina-specific synaptic connections in the retina and is specifically required for the formation of neuronal circuits that detect motion. Acts by promoting formation of synapses between two specific retinal cell types: the retinal ganglion cells W3B-RGCs and the excitatory amacrine cells VG3-ACs. Formation of synapses between these two cells plays a key role in de…	FLJ10832;KIAA1514	sidekick cell adhesion molecule 2
FCN2	-1.05	1	-0.04	1	2220	FCN2	May function in innate immunity through activation of the lectin complement pathway. Calcium-dependent and GlcNAc- binding lectin. Enhances phagocytosis of S.typhimurium by neutrophils, suggesting an opsonic effect via the collagen region. {ECO:0000269|PubMed:10679061, ECO:0000269|PubMed:17215869}.	P35;FCNL;EBP-37;ficolin-2	ficolin 2
ANPEP	-1.05	1	0.03	1	290	ANPEP	Broad specificity aminopeptidase which plays a role in the final digestion of peptides generated from hydrolysis of proteins by gastric and pancreatic proteases. Also involved in the processing of various peptides including peptide hormones, such as angiotensin III and IV, neuropeptides, and chemokines. May also be involved the cleavage of peptides bound to major histocompatibility complex class …	LAP1;gp150;p150;CD13;PEPN	alanyl aminopeptidase, membrane
PPAPDC1B	-1.05	1	0.03	1	84513	PLPP5	Displays magnesium-independent phosphatidate phosphatase activity in vitro. Catalyzes the conversion of phosphatidic acid to diacylglycerol. May be a metastatic suppressor for hepatocellular carcinoma. {ECO:0000269|PubMed:16261160, ECO:0000269|PubMed:17590538}.	HTPAP;DPPL1;PPAPDC1B	phospholipid phosphatase 5
SSSCA1	-1.05	1	0.04	1	10534	SSSCA1	Might play a role in mitosis. Antigenic molecule. Could be a centromere-associated protein. May induce anti-centromere antibodies.	p27	Sjogren syndrome/scleroderma autoantigen 1
SFTPA1	-1.05	1	0.12	1	653509	SFTPA1	In presence of calcium ions, it binds to surfactant phospholipids and contributes to lower the surface tension at the air-liquid interface in the alveoli of the mammalian lung and is essential for normal respiration. Enhances the expression of MYO18A/SP-R210 on alveolar macrophages (By similarity). {ECO:0000250|UniProtKB:P35242}.	SP-A;SP-A1;COLEC4;SFTP1	surfactant protein A1
SERPINB7	-1.05	1	0.13	1	8710	SERPINB7	Might function as an inhibitor of Lys-specific proteases. Might influence the maturation of megakaryocytes via its action as a serpin.	MEGSIN	serpin family B member 7
CLTB	-1.05	1	0.19	1	1212	CLTB	Clathrin is the major protein of the polyhedral coat of coated pits and vesicles.	Lcb	clathrin light chain B
OSCP1	-1.05	1	0.23	1	127700	OSCP1	May be involved in drug clearance in the placenta. {ECO:0000269|PubMed:16006562}.	NOR1;C1orf102	organic solute carrier partner 1
RBMX2	-1.05	1	0.25	1	51634	RBMX2	NA	CGI-79;Snu17	RNA binding motif protein X-linked 2
GPI	-1.05	1	0.43	1	2821	GPI	Besides it's role as a glycolytic enzyme, mammalian GPI can function as a tumor-secreted cytokine and an angiogenic factor (AMF) that stimulates endothelial cell motility. GPI is also a neurotrophic factor (Neuroleukin) for spinal and sensory neurons. {ECO:0000269|PubMed:11004567, ECO:0000269|PubMed:11437381}.	AMF;NLK	glucose-6-phosphate isomerase
SMIM15	-1.05	1	0.56	1	643155	SMIM15	NA	DKFZP686E2158;C5orf43	small integral membrane protein 15
ARHGAP4	-1.05	1	1.06	1	393	ARHGAP4	Inhibitory effect on stress fiber organization. May down-regulate Rho-like GTPase in hematopoietic cells.	KIAA0131;C1;p115;RhoGAP4;SrGAP4	Rho GTPase activating protein 4
PRPF4	-1.04	1	-2.21	0.856	9128	PRPF4	Participates in pre-mRNA splicing. Part of the U4/U5/U6 tri-snRNP complex, one of the building blocks of the spliceosome. {ECO:0000269|PubMed:25383878}.	Prp4p;HPRP4;HPRP4P;PRP4;SNRNP60	pre-mRNA processing factor 4
IL18RAP	-1.04	1	-1.44	1	8807	IL18RAP	Within the IL18 receptor complex, does not mediate IL18- binding, but involved in IL18-dependent signal transduction, leading to NF-kappa-B and JNK activation. {ECO:0000269|PubMed:9792649, ECO:0000305}.	AcPL;CD218b	interleukin 18 receptor accessory protein
UBE2D3	-1.04	1	-1.28	1	7323	UBE2D3	Accepts ubiquitin from the E1 complex and catalyzes its covalent attachment to other proteins. In vitro catalyzes 'Lys- 11'-, as well as 'Lys-48'-linked polyubiquitination. Cooperates with the E2 CDC34 and the SCF(FBXW11) E3 ligase complex for the polyubiquitination of NFKBIA leading to its subsequent proteasomal degradation. Acts as an initiator E2, priming the phosphorylated NFKBIA target at po…	UbcH5C	ubiquitin conjugating enzyme E2 D3
NFKBIZ	-1.04	1	-1.06	1	64332	NFKBIZ	Involved in regulation of NF-kappa-B transcription factor complexes. Inhibits NF-kappa-B activity without affecting its nuclear translocation upon stimulation. Inhibits DNA-binding of RELA and NFKB1/p50, and of the NF-kappa-B p65-p50 heterodimer and the NF-kappa-B p50-p50 homodimer. Seems also to activate NF- kappa-B-mediated transcription. In vitro, upon association with NFKB1/p50 has transcript…	MAIL;FLJ34463;INAP	NFKB inhibitor zeta
FZD6	-1.04	1	-1.05	1	8323	FZD6	Receptor for Wnt proteins. Most of frizzled receptors are coupled to the beta-catenin canonical signaling pathway, which leads to the activation of disheveled proteins, inhibition of GSK- 3 kinase, nuclear accumulation of beta-catenin and activation of Wnt target genes. A second signaling pathway involving PKC and calcium fluxes has been seen for some family members, but it is not yet clear if it…	Hfz6	frizzled class receptor 6
TMEM132D	-1.04	1	-0.86	1	121256	TMEM132D	May serve as a cell-surface marker for oligodendrocyte differentiation. {ECO:0000269|PubMed:12966072}.	KIAA1944;MOLT;PPP1R153	transmembrane protein 132D
LRRC49	-1.04	1	-0.84	1	54839	LRRC49	NA	FLJ20156	leucine rich repeat containing 49
EDEM3	-1.04	1	-0.75	1	80267	EDEM3	Involved in endoplasmic reticulum-associated degradation (ERAD). Accelerates the glycoprotein ERAD by proteasomes, by catalyzing mannose trimming from Man8GlcNAc2 to Man7GlcNAc2 in the N-glycans. Seems to have alpha 1,2-mannosidase activity (By similarity). {ECO:0000250, ECO:0000269|PubMed:25092655}.	C1orf22	ER degradation enhancing alpha-mannosidase like protein 3
IKZF1	-1.04	1	-0.73	1	10320	IKZF1	Transcription regulator of hematopoietic cell differentiation (PubMed:17934067). Binds gamma-satellite DNA (PubMed:17135265, PubMed:19141594). Plays a role in the development of lymphocytes, B- and T-cells. Binds and activates the enhancer (delta-A element) of the CD3-delta gene. Repressor of the TDT (fikzfterminal deoxynucleotidyltransferase) gene during thymocyte differentiation. Regulates tran…	hIk-1;LyF-1;Hs.54452;IKAROS;PPP1R92;ZNFN1A1	IKAROS family zinc finger 1
GNRH2	-1.04	1	-0.62	1	2797	GNRH2	Stimulates the secretion of gonadotropins; it stimulates the secretion of both luteinizing and follicle-stimulating hormones.	NA	gonadotropin releasing hormone 2
NLRP5	-1.04	1	-0.56	1	126206	NLRP5	As a member of the subcortical maternal complex (SCMC), plays an essential role for zygotes to progress beyond the first embryonic cell divisions. {ECO:0000250}.	PYPAF8;MATER;PAN11;CLR19.8;NALP5	NLR family pyrin domain containing 5
BPIFB3	-1.04	1	-0.52	1	359710	BPIFB3	May have the capacity to recognize and bind specific classes of odorants. May act as a carrier molecule, transporting odorants across the mucus layer to access receptor sites. May serve as a primary defense mechanism by recognizing and removing potentially harmful odorants or pathogenic microorganisms from the mucosa or clearing excess odorant from mucus to enable new odorant stimuli to be receiv…	dJ726C3.4;LPLUNC3;RYA3;C20orf185	BPI fold containing family B member 3
RANBP3	-1.04	1	-0.44	1	8498	RANBP3	Acts as a cofactor for XPO1/CRM1-mediated nuclear export, perhaps as export complex scaffolding protein. Bound to XPO1/CRM1, stabilizes the XPO1/CRM1-cargo interaction. In the absence of Ran-bound GTP prevents binding of XPO1/CRM1 to the nuclear pore complex. Binds to CHC1/RCC1 and increases the guanine nucleotide exchange activity of CHC1/RCC1. Recruits XPO1/CRM1 to CHC1/RCC1 in a Ran-dependent …	NA	RAN binding protein 3
HIST1H2BN	-1.04	1	-0.41	1	8341	HIST1H2BN	Core component of nucleosome. Nucleosomes wrap and compact DNA into chromatin, limiting DNA accessibility to the cellular machineries which require DNA as a template. Histones thereby play a central role in transcription regulation, DNA repair, DNA replication and chromosomal stability. DNA accessibility is regulated via a complex set of post-translational modifications of histones, also called h…	H2B/d;H2BFD	histone cluster 1 H2B family member n
ALG5	-1.04	1	-0.39	1	29880	ALG5	NA	bA421P11.2	ALG5, dolichyl-phosphate beta-glucosyltransferase
HEPACAM2	-1.04	1	-0.29	1	253012	HEPACAM2	Required during prometaphase for centrosome maturation. Following poly-ADP-ribosylation (PARsylation) by TNKS, translocates from the Golgi apparatus to mitotic centrosomes and plays a key role in the formation of robust microtubules for prompt movement of chromosomes: anchors AKAP9/CG-NAP, a scaffold protein of the gamma-tubulin ring complex and promotes centrosome maturation. {ECO:0000269|PubMed…	FLJ38683	HEPACAM family member 2
CLDN12	-1.04	1	-0.2	1	9069	CLDN12	Plays a major role in tight junction-specific obliteration of the intercellular space, through calcium- independent cell-adhesion activity. {ECO:0000250}.	NA	claudin 12
KRTAP4-7	-1.04	1	-0.15	1	100132476	KRTAP4-7	NA	KAP4.7	keratin associated protein 4-7
NAA60	-1.04	1	-0.1	1	79903	NAA60	N-alpha-acetyltransferase that specifically mediates the acetylation of N-terminal residues of the transmembrane proteins, with a strong preference for N-termini facing the cytosol (PubMed:25732826). Displays N-terminal acetyltransferase activity towards a range of N-terminal sequences including those starting with Met-Lys, Met-Val, Met-Ala and Met-Met (PubMed:21750686, PubMed:25732826, PubMed:27…	FLJ14154;NAT15	N(alpha)-acetyltransferase 60, NatF catalytic subunit
MYH6	-1.04	1	-0.07	1	4624	MYH6	Muscle contraction.	NA	myosin heavy chain 6
PPP3CB	-1.04	1	0.05	1	5532	PPP3CB	Calcium-dependent, calmodulin-stimulated protein phosphatase. This subunit may have a role in the calmodulin activation of calcineurin.	CALNA2;CNA2;PP2Bbeta;CALNB	protein phosphatase 3 catalytic subunit beta
NCMAP	-1.04	1	0.09	1	400746	NCMAP	Plays a role in myelin formation. {ECO:0000250}.	FLJ42528;MP11;C1orf130	non-compact myelin associated protein
SLC7A2	-1.04	1	0.23	1	6542	SLC7A2	Functions as permease involved in the transport of the cationic amino acids (arginine, lysine and ornithine); the affinity for its substrates differs between isoforms created by alternative splicing. Isoform 1 functions as permease that mediates the transport of the cationic amino acids (arginine, lysine and ornithine), and it has much higher affinity for arginine than isoform 2. Isoform 2 functi…	CAT-2;HCAT2;ATRC2	solute carrier family 7 member 2
SUZ12	-1.04	1	0.25	1	23512	SUZ12	Polycomb group (PcG) protein. Component of the PRC2/EED- EZH2 complex, which methylates 'Lys-9' (H3K9me) and 'Lys-27' (H3K27me) of histone H3, leading to transcriptional repression of the affected target gene. The PRC2/EED-EZH2 complex may also serve as a recruiting platform for DNA methyltransferases, thereby linking two epigenetic repression systems. Genes repressed by the PRC2/EED-EZH2 complex…	JJAZ1;KIAA0160;CHET9	SUZ12, polycomb repressive complex 2 subunit
NISCH	-1.04	1	0.29	1	11188	NISCH	Acts either as the functional imidazoline-1 receptor (I1R) candidate or as a membrane-associated mediator of the I1R signaling. Binds numerous imidazoline ligands that induces initiation of cell-signaling cascades triggering to cell survival, growth and migration. Its activation by the agonist rilmenidine induces an increase in phosphorylation of mitogen-activated protein kinases MAPK1 and MAPK3 …	KIAA0975;I-1;IRAS	nischarin
C1orf53	-1.04	1	0.33	1	388722	C1orf53	NA	NA	chromosome 1 open reading frame 53
WAC	-1.04	1	0.65	1	51322	WAC	Acts as a linker between gene transcription and histone H2B monoubiquitination at 'Lys-120' (H2BK120ub1) (PubMed:21329877). Interacts with the RNA polymerase II transcriptional machinery via its WW domain and with RNF20-RNF40 via its coiled coil region, thereby linking and regulating H2BK120ub1 and gene transcription (PubMed:21329877). Regulates the cell-cycle checkpoint activation in response to…	Wwp4;FLJ31290;PRO1741;BM-016;MGC10753	WW domain containing adaptor with coiled-coil
FXR1	-1.04	1	0.72	1	8087	FXR1	RNA-binding protein required for embryonic and postnatal development of muscle tissue. May regulate intracellular transport and local translation of certain mRNAs (By similarity). {ECO:0000250}.	NA	FMR1 autosomal homolog 1
ABL1	-1.04	1	0.72	1	25	ABL1	Non-receptor tyrosine-protein kinase that plays a role in many key processes linked to cell growth and survival such as cytoskeleton remodeling in response to extracellular stimuli, cell motility and adhesion, receptor endocytosis, autophagy, DNA damage response and apoptosis. Coordinates actin remodeling through tyrosine phosphorylation of proteins controlling cytoskeleton dynamics like WASF3 (i…	JTK7;c-ABL;p150;ABL	ABL proto-oncogene 1, non-receptor tyrosine kinase
LIPF	-1.04	1	0.76	1	8513	LIPF	NA	HGL;HLAL	lipase F, gastric type
SRF	-1.03	1	-1.7	1	6722	SRF	SRF is a transcription factor that binds to the serum response element (SRE), a short sequence of dyad symmetry located 300 bp to the 5' of the site of transcription initiation of some genes (such as FOS). Required for cardiac differentiation and maturation.	MCM1	serum response factor
LINGO1	-1.03	1	-1.58	1	84894	LINGO1	Functional component of the Nogo receptor signaling complex (RTN4R/NGFR) in RhoA activation responsible for some inhibition of axonal regeneration by myelin-associated factors (PubMed:14966521, PubMed:15694321). Is also an important negative regulator of oligodentrocyte differentiation and axonal myelination (PubMed:15895088). Acts in conjunction with RTN4 and RTN4R in regulating neuronal precurs…	FLJ14594;LERN1;LRRN6A	leucine rich repeat and Ig domain containing 1
PCGF1	-1.03	1	-1.5	1	84759	PCGF1	Component of the Polycomb group (PcG) multiprotein BCOR complex, a complex required to maintain the transcriptionally repressive state of some genes, such as BCL6 and the cyclin- dependent kinase inhibitor, CDKN1A. Transcriptional repressor that may be targeted to the DNA by BCL6; this transcription repressor activity may be related to PKC signaling pathway. Represses CDKN1A expression by binding…	NSPC1;RNF68;MGC10882	polycomb group ring finger 1
PHLDB3	-1.03	1	-1.42	1	653583	PHLDB3	NA	FLJ40193	pleckstrin homology like domain family B member 3
DUSP16	-1.03	1	-1.42	1	80824	DUSP16	Dual specificity protein phosphatase involved in the inactivation of MAP kinases. Dephosphorylates MAPK10 bound to ARRB2. {ECO:0000269|PubMed:11489891, ECO:0000269|PubMed:15888437}.	MKP-7;KIAA1700;MKP7	dual specificity phosphatase 16
HIST1H2AL	-1.03	1	-1.25	1	8332	HIST1H2AL	Core component of nucleosome. Nucleosomes wrap and compact DNA into chromatin, limiting DNA accessibility to the cellular machineries which require DNA as a template. Histones thereby play a central role in transcription regulation, DNA repair, DNA replication and chromosomal stability. DNA accessibility is regulated via a complex set of post-translational modifications of histones, also called h…	H2A/i;dJ193B12.9;H2AFI	histone cluster 1 H2A family member l
PLA2G4A	-1.03	1	-1.18	1	5321	PLA2G4A	Selectively hydrolyzes arachidonyl phospholipids in the sn-2 position releasing arachidonic acid. Together with its lysophospholipid activity, it is implicated in the initiation of the inflammatory response.	cPLA2-alpha;PLA2G4	phospholipase A2 group IVA
COTL1	-1.03	1	-1.09	1	23406	COTL1	Binds to F-actin in a calcium-independent manner. Has no direct effect on actin depolymerization. Acts as a chaperone for ALOX5 (5LO), influencing both its stability and activity in leukotrienes synthesis. {ECO:0000269|PubMed:11583571, ECO:0000269|PubMed:19807693}.	CLP	coactosin like F-actin binding protein 1
TCF4	-1.03	1	-0.89	1	6925	TCF4	Transcription factor that binds to the immunoglobulin enhancer Mu-E5/KE5-motif. Involved in the initiation of neuronal differentiation. Activates transcription by binding to the E box (5'-CANNTG-3'). Binds to the E-box present in the somatostatin receptor 2 initiator element (SSTR2-INR) to activate transcription (By similarity). Preferentially binds to either 5'-ACANNTGT-3' or 5'-CCANNTGG-3'. {EC…	SEF2-1B;ITF2;bHLHb19;E2-2	transcription factor 4
RMND5B	-1.03	1	-0.84	1	64777	RMND5B	NA	FLJ22318;GID2;GID2B	required for meiotic nuclear division 5 homolog B
NOXA1	-1.03	1	-0.82	1	10811	NOXA1	Functions as an activator of NOX1, a superoxide- producing NADPH oxidase. Functions in the production of reactive oxygen species (ROS) which participate in a variety of biological processes including host defense, hormone biosynthesis, oxygen sensing and signal transduction. May also activate CYBB/gp91phox and NOX3. {ECO:0000269|PubMed:12657628, ECO:0000269|PubMed:12716910, ECO:0000269|PubMed:146…	NY-CO-31;FLJ25475;SDCCAG31	NADPH oxidase activator 1
TTYH3	-1.03	1	-0.73	1	80727	TTYH3	Probable large-conductance Ca(2+)-activated chloride channel. May play a role in Ca(2+) signal transduction. {ECO:0000269|PubMed:15010458}.	KIAA1691	tweety family member 3
NPTN	-1.03	1	-0.71	1	27020	NPTN	Probable homophilic and heterophilic cell adhesion molecule involved in long term potentiation at hippocampal excitatory synapses through activation of p38MAPK. May also regulate neurite outgrowth by activating the FGFR1 signaling pathway. May play a role in synaptic plasticity (By similarity). {ECO:0000250}.	SDR1;GP55;GP65;np65;np55;SDFR1	neuroplastin
THBS2	-1.03	1	-0.67	1	7058	THBS2	Adhesive glycoprotein that mediates cell-to-cell and cell-to-matrix interactions. Ligand for CD36 mediating antiangiogenic properties. {ECO:0000269|PubMed:20714802}.	TSP2	thrombospondin 2
ARRB1	-1.03	1	-0.64	1	408	ARRB1	Functions in regulating agonist-mediated G-protein coupled receptor (GPCR) signaling by mediating both receptor desensitization and resensitization processes. During homologous desensitization, beta-arrestins bind to the GPRK-phosphorylated receptor and sterically preclude its coupling to the cognate G- protein; the binding appears to require additional receptor determinants exposed only in the a…	ARR1	arrestin beta 1
ZNF585B	-1.03	1	-0.63	1	92285	ZNF585B	May be involved in transcriptional regulation.	FLJ14928;SZFP41	zinc finger protein 585B
TAF15	-1.03	1	-0.57	1	8148	TAF15	RNA and ssDNA-binding protein that may play specific roles during transcription initiation at distinct promoters. Can enter the preinitiation complex together with the RNA polymerase II (Pol II). {ECO:0000269|PubMed:19124016}.	hTAFII68;RBP56;Npl3;TAF2N	TATA-box binding protein associated factor 15
F2RL1	-1.03	1	-0.55	1	2150	F2RL1	Receptor for trypsin and trypsin-like enzymes coupled to G proteins (PubMed:28445455). Its function is mediated through the activation of several signaling pathways including phospholipase C (PLC), intracellular calcium, mitogen-activated protein kinase (MAPK), I-kappaB kinase/NF-kappaB and Rho (PubMed:28445455). Can also be transactivated by cleaved F2R/PAR1. Involved in modulation of inflammato…	PAR2;GPR11	F2R like trypsin receptor 1
NME5	-1.03	1	-0.46	1	8382	NME5	Does not seem to have NDK kinase activity. Confers protection from cell death by Bax and alters the cellular levels of several antioxidant enzymes including Gpx5. May play a role in spermiogenesis by increasing the ability of late-stage spermatids to eliminate reactive oxygen species (By similarity). {ECO:0000250}.	nm23-H5;RSPH23	NME/NM23 family member 5
OR52L1	-1.03	1	-0.42	1	338751	OR52L1	Odorant receptor. {ECO:0000305}.	NA	olfactory receptor family 52 subfamily L member 1
SMOC2	-1.03	1	-0.41	1	64094	SMOC2	Promotes matrix assembly and cell adhesiveness (By similarity). Can stimulate endothelial cell proliferation, migration, as well as angiogenesis. {ECO:0000250, ECO:0000269|PubMed:16774925}.	SMAP2	SPARC related modular calcium binding 2
ZNF317	-1.03	1	-0.35	1	57693	ZNF317	May function as a transcription factor. May play an important role in erythroid maturation and lymphoid proliferation.	NA	zinc finger protein 317
CCDC124	-1.03	1	-0.3	1	115098	CCDC124	Required for proper progression of late cytokinetic stages. {ECO:0000269|PubMed:23894443}.	NA	coiled-coil domain containing 124
GFOD1	-1.03	1	-0.3	1	54438	GFOD1	NA	FLJ20330;ADG-90;C6orf114	glucose-fructose oxidoreductase domain containing 1
AKIRIN2	-1.03	1	-0.12	1	55122	AKIRIN2	Required for the innate immune response. Downstream effector of the Toll-like receptor (TLR), TNF and IL-1 beta signaling pathways leading to the production of IL-6. Forms a complex with YWHAB that acts to repress transcription of DUSP1 (By similarity). {ECO:0000250}.	FLJ10342;dJ486L4.2;C6orf166	akirin 2
PHIP	-1.03	1	-0.02	1	55023	PHIP	Probable regulator of the insulin and insulin-like growth factor signaling pathways. Stimulates cell proliferation through regulation of cyclin transcription and has an anti- apoptotic activity through AKT1 phosphorylation and activation. Plays a role in the regulation of cell morphology and cytoskeletal organization. {ECO:0000269|PubMed:12242307, ECO:0000269|PubMed:21834987}.	ndrp;FLJ20705;DCAF14;BRWD2;WDR11	pleckstrin homology domain interacting protein
ZNF547	-1.03	1	0	1	284306	ZNF547	May be involved in transcriptional regulation.	FLJ31100	zinc finger protein 547
COLEC10	-1.03	1	0	1	10584	COLEC10	Lectin that binds to various sugars: galactose > mannose = fucose > N-acetylglucosamine > N-acetylgalactosamine (PubMed:10224141). Acts as a chemoattractant, probably involved in the regulation of cell migration (PubMed:28301481). {ECO:0000269|PubMed:10224141, ECO:0000269|PubMed:28301481}.	CL-L1	collectin subfamily member 10
C1orf63	-1.03	1	0.02	1	57035	RSRP1	NA	DJ465N24.2.1;C1orf63	arginine and serine rich protein 1
SLC14A1	-1.03	1	0.06	1	6563	SLC14A1	Urea channel that facilitates transmembrane urea transport down a concentration gradient. A constriction of the transmembrane channel functions as selectivity filter through which urea is expected to pass in dehydrated form. The rate of urea conduction is increased by hypotonic stress. Plays an important role in the kidney medulla collecting ducts, where it allows rapid equilibration between the …	HsT1341;RACH1;RACH2;JK	solute carrier family 14 member 1 (Kidd blood group)
RBMS1	-1.03	1	0.23	1	5937	RBMS1	Single-stranded DNA binding protein that interacts with the region upstream of the MYC gene. Binds specifically to the DNA sequence motif 5'-[AT]CT[AT][AT]T-3'. Probably has a role in DNA replication.	SCR2;MSSP-1;MSSP-2;MSSP-3;YC1;HCC-4;DKFZp564H0764;C2orf12	RNA binding motif single stranded interacting protein 1
HHLA3	-1.03	1	0.42	1	11147	HHLA3	NA	NA	HERV-H LTR-associating 3
CEACAM8	-1.03	1	1.07	1	1088	CEACAM8	NA	CD66b;CGM6	carcinoembryonic antigen related cell adhesion molecule 8
MANSC4	-1.02	1	-1.48	1	100287284	MANSC4	NA	NA	MANSC domain containing 4
ACADSB	-1.02	1	-1.46	1	36	ACADSB	Has greatest activity toward short branched chain acyl- CoA derivative such as (s)-2-methylbutyryl-CoA, isobutyryl-CoA, and 2-methylhexanoyl-CoA as well as toward short straight chain acyl-CoAs such as butyryl-CoA and hexanoyl-CoA. Can use valproyl- CoA as substrate and may play a role in controlling the metabolic flux of valproic acid in the development of toxicity of this agent.	SBCAD;ACAD7	acyl-CoA dehydrogenase short/branched chain
C15orf54	-1.02	1	-1.28	1	400360	NA	NA	NA	NA
FAM181A	-1.02	1	-1.11	1	90050	FAM181A	NA	C14orf152	family with sequence similarity 181 member A
CNOT3	-1.02	1	-1.1	1	4849	CNOT3	Component of the CCR4-NOT complex which is one of the major cellular mRNA deadenylases and is linked to various cellular processes including bulk mRNA degradation, miRNA-mediated repression, translational repression during translational initiation and general transcription regulation. Additional complex functions may be a consequence of its influence on mRNA expression. May be involved in metabol…	NOT3H;KIAA0691;LENG2;NOT3	CCR4-NOT transcription complex subunit 3
NUMBL	-1.02	1	-0.91	1	9253	NUMBL	Plays a role in the process of neurogenesis. Required throughout embryonic neurogenesis to maintain neural progenitor cells, also called radial glial cells (RGCs), by allowing their daughter cells to choose progenitor over neuronal cell fate. Not required for the proliferation of neural progenitor cells before the onset of embryonic neurogenesis. Also required postnatally in the subventricular zo…	NUMB-R;CTG3a;CAG3A;TNRC23;NUMBR;NUMBLIKE	NUMB like, endocytic adaptor protein
FAM214A	-1.02	1	-0.84	1	56204	FAM214A	NA	FLJ10980;KIAA1370	family with sequence similarity 214 member A
OTOR	-1.02	1	-0.83	1	56914	OTOR	NA	MIAL;MIAL1;FDP	otoraplin
POLR2D	-1.02	1	-0.74	1	5433	POLR2D	DNA-dependent RNA polymerase catalyzes the transcription of DNA into RNA using the four ribonucleoside triphosphates as substrates. Component of RNA polymerase II which synthesizes mRNA precursors and many functional non-coding RNAs. Pol II is the central component of the basal RNA polymerase II transcription machinery. It is composed of mobile elements that move relative to each other. RPB4 is p…	RBP4	RNA polymerase II subunit D
ADCY7	-1.02	1	-0.72	1	113	ADCY7	This is a membrane-bound, calcium-inhibitable adenylyl cyclase.	KIAA0037;AC7	adenylate cyclase 7
ASGR1	-1.02	1	-0.64	1	432	ASGR1	Mediates the endocytosis of plasma glycoproteins to which the terminal sialic acid residue on their complex carbohydrate moieties has been removed. The receptor recognizes terminal galactose and N-acetylgalactosamine units. After ligand binding to the receptor, the resulting complex is internalized and transported to a sorting organelle, where receptor and ligand are disassociated. The receptor t…	CLEC4H1	asialoglycoprotein receptor 1
HSDL2	-1.02	1	-0.61	1	84263	HSDL2	Has apparently no steroid dehydrogenase activity. {ECO:0000269|PubMed:19703561}.	SDR13C1;C9orf99	hydroxysteroid dehydrogenase like 2
MOB4	-1.02	1	-0.5	1	25843	MOB4	May play a role in membrane trafficking, specifically in membrane budding reactions. {ECO:0000250}.	MOB3;DKFZP564M112;CGI-95;2C4D;PHOCN;PREI3;MOBKL3	MOB family member 4, phocein
DNAAF2	-1.02	1	-0.46	1	55172	DNAAF2	Required for cytoplasmic pre-assembly of axonemal dyneins, thereby playing a central role in motility in cilia and flagella. Involved in pre-assembly of dynein arm complexes in the cytoplasm before intraflagellar transport loads them for the ciliary compartment. {ECO:0000255|HAMAP-Rule:MF 03069}.	FLJ10563;KTU;PF13;CILD10;C14orf104	dynein axonemal assembly factor 2
OR52N1	-1.02	1	-0.46	1	79473	OR52N1	Odorant receptor. {ECO:0000305}.	NA	olfactory receptor family 52 subfamily N member 1
TRANK1	-1.02	1	-0.36	1	9881	TRANK1	NA	LBA1;KIAA0342	tetratricopeptide repeat and ankyrin repeat containing 1
CPA4	-1.02	1	-0.34	1	51200	CPA4	Metalloprotease that could be involved in the histone hyperacetylation pathway (PubMed:10383164). Releases a C-terminal amino acid, with preference for -Phe, -Leu, -Ile, -Met, -Tyr and -Val (PubMed:20385563). {ECO:0000269|PubMed:10383164, ECO:0000269|PubMed:20385563}.	CPA3	carboxypeptidase A4
MYB	-1.02	1	-0.33	1	4602	MYB	Transcriptional activator; DNA-binding protein that specifically recognize the sequence 5'-YAAC[GT]G-3'. Plays an important role in the control of proliferation and differentiation of hematopoietic progenitor cells.	c-myb	MYB proto-oncogene, transcription factor
ZBTB8B	-1.02	1	-0.2	1	728116	ZBTB8B	May be involved in transcriptional regulation.	RP1-27O5.1;DKFZp547H154;ZNF916B	zinc finger and BTB domain containing 8B
CCDC166	-1.02	1	-0.11	1	100130274	CCDC166	NA	NA	coiled-coil domain containing 166
FAM114A1	-1.02	1	-0.07	1	92689	FAM114A1	May play a role in neuronal cell development. {ECO:0000250}.	Noxp20	family with sequence similarity 114 member A1
DOC2B	-1.02	1	-0.05	1	8447	DOC2B	Calcium sensor which positively regulates SNARE- dependent fusion of vesicles with membranes. Binds phospholipids in a calcium-dependent manner and may act at the priming stage of fusion by modifying membrane curvature to stimulate fusion. Involved in calcium-triggered exocytosis in chromaffin cells and calcium-dependent spontaneous release of neurotransmitter in absence of action potentials in n…	DOC2BL	double C2 domain beta
ATXN7L3B	-1.02	1	0.04	1	552889	ATXN7L3B	By binding to ENY2, interferes with the nuclear functions of the deubiquitinase (DUB) module of the SAGA complex which consists of ENY2, ATXN7, ATXN7L3 and the histone deubiquitinating component USP22. Affects USP22 DUB activity toward histones indirectly by changing the subcellular distribution of ENY2 and altering ENY2 availability for ATXN7L3 interaction. Regulates H2B monoubiquitination (H2Bu…	lnc-SCA7	ataxin 7 like 3B
CD24	-1.02	1	0.04	1	100133941	CD24	May have a pivotal role in cell differentiation of different cell types. Signaling could be triggered by the binding of a lectin-like ligand to the CD24 carbohydrates, and transduced by the release of second messengers derived from the GPI-anchor. Modulates B-cell activation responses. Promotes AG-dependent proliferation of B-cells, and prevents their terminal differentiation into antibody-formin…	CD24A	CD24 molecule
PRAMEF14	-1.02	1	0.06	1	729528	PRAMEF14	NA	OTTHUMG00000007916	PRAME family member 14
PRR20E	-1.02	1	0.09	1	729250	PRR20E	NA	NA	proline rich 20E
PRR20C	-1.02	1	0.09	1	729240	PRR20C	NA	NA	proline rich 20C
PRR20B	-1.02	1	0.09	1	729233	PRR20B	NA	NA	proline rich 20B
PRR20D	-1.02	1	0.09	1	729246	PRR20D	NA	NA	proline rich 20D
PRR20A	-1.02	1	0.09	1	122183	PRR20A	NA	FLJ40296;PRR20	proline rich 20A
TMEM119	-1.02	1	0.25	1	338773	TMEM119	Plays an important role in bone formation and normal bone mineralization. Promotes the differentiation of myoblasts into osteoblasts (PubMed:20025746). May induce the commitment and differentiation of myoblasts into osteoblasts through an enhancement of BMP2 production and interaction with the BMP-RUNX2 pathway. Upregulates the expression of ATF4, a transcription factor which plays a central role…	NA	transmembrane protein 119
PARP3	-1.02	1	0.28	1	10039	PARP3	Involved in the base excision repair (BER) pathway, by catalyzing the poly(ADP-ribosyl)ation of a limited number of acceptor proteins involved in chromatin architecture and in DNA metabolism. This modification follows DNA damages and appears as an obligatory step in a detection/signaling pathway leading to the reparation of DNA strand breaks. May link the DNA damage surveillance network to the mi…	ADPRT3;IRT1;hPARP-3;pADPRT-3;ADPRTL3	poly(ADP-ribose) polymerase family member 3
SH3KBP1	-1.02	1	0.31	1	30011	SH3KBP1	Adapter protein involved in regulating diverse signal transduction pathways. Involved in the regulation of endocytosis and lysosomal degradation of ligand-induced receptor tyrosine kinases, including EGFR and MET/hepatocyte growth factor receptor, through a association with CBL and endophilins. The association with CBL, and thus the receptor internalization, may inhibited by an interaction with P…	CIN85	SH3 domain containing kinase binding protein 1
ZFP91	-1.02	1	0.38	1	80829	ZFP91	Atypical E3 ubiquitin-protein ligase that mediates 'Lys- 63'-linked ubiquitination of MAP3K14/NIK, leading to stabilize and activate MAP3K14/NIK. It thereby acts as an activator of the non- canonical NF-kappa-B2/NFKB2 pathway. May also play an important role in cell proliferation and/or anti-apoptosis. {ECO:0000269|PubMed:12738986, ECO:0000269|PubMed:20682767}.	PZF;ZNF757	ZFP91 zinc finger protein
ZNF208	-1.02	1	0.42	1	7757	ZNF208	May be involved in transcriptional regulation.	PMIDP;ZNF95	zinc finger protein 208
GRINA	-1.02	1	0.47	1	2907	GRINA	Potential apoptotic regulator.	HNRGW;TMBIM3;LFG1;NMDARA1	glutamate ionotropic receptor NMDA type subunit associated protein 1
SLC36A2	-1.02	1	0.72	1	153201	SLC36A2	Involved in a pH-dependent electrogenic neuronal transport and sequestration of small amino acids. Transports glycine and proline. Inhibited by sarcosine (By similarity). {ECO:0000250, ECO:0000269|PubMed:19033659}.	PAT2;tramdorin;TRAMD1	solute carrier family 36 member 2
MTA1	-1.02	1	0.79	1	9112	MTA1	Transcriptional coregulator which can act as both a transcriptional corepressor and coactivator. As a part of the histone-deacetylase multiprotein complex (NuRD), regulates transcription of its targets by modifying the acetylation status of the target chromatin and cofactor accessibility to the target DNA. In conjunction with other components of NuRD, acts as a transcriptional corepressor of BRCA…	NA	metastasis associated 1
IQCJ	-1.01	1	-1.24	1	654502	IQCJ	NA	NA	IQ motif containing J
HNRNPU	-1.01	1	-1.02	1	3192	HNRNPU	DNA- and RNA-binding protein involved in several cellular processes such as nuclear chromatin organization, telomere-length regulation, transcription, mRNA alternative splicing and stability, Xist-mediated transcriptional silencing and mitotic cell progression (PubMed:10490622, PubMed:18082603, PubMed:19029303, PubMed:22325991, PubMed:25986610, PubMed:28622508). Plays a role in the regulation of …	SAF-A;hnRNPU;FLJ37978;FLJ30202;HNRPU;HNRNPU-AS1;C1orf199;NCRNA00201	heterogeneous nuclear ribonucleoprotein U
NRP2	-1.01	1	-0.79	1	8828	NRP2	High affinity receptor for semaphorins 3C, 3F, VEGF-165 and VEGF-145 isoforms of VEGF, and the PLGF-2 isoform of PGF.	VEGF165R2	neuropilin 2
EN1	-1.01	1	-0.69	1	2019	EN1	NA	NA	engrailed homeobox 1
CWC15	-1.01	1	-0.57	1	51503	CWC15	Component of the PRP19-CDC5L complex that forms an integral part of the spliceosome and is required for activating pre-mRNA splicing. {ECO:0000269|PubMed:20176811}.	C11orf5;HSPC148;Cwf15;AD002	CWC15 spliceosome associated protein homolog
TRIM16L	-1.01	1	-0.51	1	147166	TRIM16L	NA	TRIM70	tripartite motif containing 16 like
ZNF148	-1.01	1	-0.29	1	7707	ZNF148	Involved in transcriptional regulation. Represses the transcription of a number of genes including gastrin, stromelysin and enolase. Binds to the G-rich box in the enhancer region of these genes.	BERF-1;ZBP-89;BFCOL1;HT-BETA;ZFP148;pHZ-52	zinc finger protein 148
BUB1B	-1.01	1	-0.29	1	701	BUB1B	Essential component of the mitotic checkpoint. Required for normal mitosis progression. The mitotic checkpoint delays anaphase until all chromosomes are properly attached to the mitotic spindle. One of its checkpoint functions is to inhibit the activity of the anaphase-promoting complex/cyclosome (APC/C) by blocking the binding of CDC20 to APC/C, independently of its kinase activity. The other is…	BUBR1;MAD3L;Bub1A;SSK1	BUB1 mitotic checkpoint serine/threonine kinase B
FOXF1	-1.01	1	-0.26	1	2294	FOXF1	Probable transcription activator for a number of lung- specific genes.	FREAC1;FKHL5	forkhead box F1
CCDC173	-1.01	1	-0.26	1	129881	CCDC173	NA	LOC129881;C2orf77	coiled-coil domain containing 173
ANAPC5	-1.01	1	-0.16	1	51433	ANAPC5	Component of the anaphase promoting complex/cyclosome (APC/C), a cell cycle-regulated E3 ubiquitin ligase that controls progression through mitosis and the G1 phase of the cell cycle. The APC/C complex acts by mediating ubiquitination and subsequent degradation of target proteins: it mainly mediates the formation of 'Lys-11'-linked polyubiquitin chains and, to a lower extent, the formation of 'Ly…	APC5	anaphase promoting complex subunit 5
PSG3	-1.01	1	-0.13	1	5671	PSG3	NA	NA	pregnancy specific beta-1-glycoprotein 3
IZUMO4	-1.01	1	-0.05	1	113177	IZUMO4	NA	C19orf36	IZUMO family member 4
ABHD16B	-1.01	1	-0.04	1	140701	ABHD16B	NA	dJ591C20.1;C20orf135	abhydrolase domain containing 16B
TCEAL1	-1.01	1	0	1	9338	TCEAL1	May be involved in transcriptional regulation. Modulates various viral and cellular promoters in a promoter context- dependent manner. For example, transcription from the FOS promoter is increased, while Rous sarcoma virus (RSV) long terminal repeat (LTR) promoter activity is repressed. Does not bind DNA directly.	p21;pp21;SIIR;P21;WEX9	transcription elongation factor A like 1
TEX40	-1.01	1	0.04	1	25858	CATSPERZ	Auxiliary component of the CatSper complex, a complex involved in sperm cell hyperactivation. Sperm cell hyperactivation is needed for sperm motility which is essential late in the preparation of sperm for fertilization. Required for a distribution of the CatSper complex in linear quadrilateral nanodomains along the flagellum, maximizing fertilization inside the mammalian female reproductive trac…	DKFZP566E164;C11orf20;TEX40	catsper channel auxiliary subunit zeta
MARCH8	-1.01	1	0.1	1	220972	MARCH8	E3 ubiquitin-protein ligase that mediates ubiquitination of CD86 and MHC class II proteins, such as HLA-DR alpha and beta, and promotes their subsequent endocytosis and sorting to lysosomes via multivesicular bodies. May also promote ubiquitination and endocytosis of TFRC and FAS. {ECO:0000269|PubMed:12582153, ECO:0000269|PubMed:14722266, ECO:0000269|PubMed:18389477, ECO:0000269|PubMed:19117940, …	c-MIR;CMIR;MARCH-VIII;RNF178;MIR	membrane associated ring-CH-type finger 8
ADRA1B	-1.01	1	0.18	1	147	ADRA1B	This alpha-adrenergic receptor mediates its action by association with G proteins that activate a phosphatidylinositol- calcium second messenger system. Its effect is mediated by G(q) and G(11) proteins. Nuclear ADRA1A-ADRA1B heterooligomers regulate phenylephrine (PE)-stimulated ERK signaling in cardiac myocytes. {ECO:0000269|PubMed:18802028, ECO:0000269|PubMed:22120526}.	NA	adrenoceptor alpha 1B
PBX1	-1.01	1	0.41	1	5087	PBX1	Binds the sequence 5'-ATCAATCAA-3'. Acts as a transcriptional activator of PF4 in complex with MEIS1. Converted into a potent transcriptional activator by the (1;19) translocation. May have a role in steroidogenesis and, subsequently, sexual development and differentiation. Isoform PBX1b as part of a PDX1:PBX1b:MEIS2b complex in pancreatic acinar cells is involved in the transcriptional activatio…	NA	PBX homeobox 1
DMWD	-1.01	1	0.47	1	1762	DMWD	NA	DMR-N9;gene59;D19S593E	DM1 locus, WD repeat containing
WLS	-1.01	1	0.64	1	79971	WLS	Regulates Wnt proteins sorting and secretion in a feedback regulatory mechanism. This reciprocal interaction plays a key role in the regulation of expression, subcellular location, binding and organelle-specific association of Wnt proteins. Plays also an important role in establishment of the anterior-posterior body axis formation during development (By similarity). {ECO:0000250, ECO:0000269|PubM…	FLJ23091;MRP;wls;EVI;mig-14;C1orf139;GPR177	Wnt ligand secretion mediator
NEK4	-1.01	1	0.65	1	6787	NEK4	Protein kinase that seems to act exclusively upon threonine residues (By similarity). Required for normal entry into proliferative arrest after a limited number of cell divisions, also called replicative senescence. Required for normal cell cycle arrest in response to double-stranded DNA damage. {ECO:0000250|UniProtKB:Q9Z1J2, ECO:0000269|PubMed:22851694}.	NRK2;pp12301;STK2	NIMA related kinase 4
AP2A1	-1.01	1	0.7	1	160	AP2A1	Component of the adaptor protein complex 2 (AP-2). Adaptor protein complexes function in protein transport via transport vesicles in different membrane traffic pathways. Adaptor protein complexes are vesicle coat components and appear to be involved in cargo selection and vesicle formation. AP-2 is involved in clathrin-dependent endocytosis in which cargo proteins are incorporated into vesicles s…	CLAPA1;ADTAA	adaptor related protein complex 2 subunit alpha 1
FIBIN	-1.01	1	0.81	1	387758	FIBIN	NA	MGC24932	fin bud initiation factor homolog
CREBRF	-1	1	-1.88	0.708	153222	CREBRF	Acts as a negative regulator of the endoplasmic reticulum stress response or unfolded protein response (UPR). Represses the transcriptional activity of CREB3 during the UPR. Recruits CREB3 into nuclear foci. {ECO:0000269|PubMed:18391022}.	LRF;C5orf41	CREB3 regulatory factor
TMOD3	-1	1	-1.16	1	29766	TMOD3	Blocks the elongation and depolymerization of the actin filaments at the pointed end. The Tmod/TM complex contributes to the formation of the short actin protofilament, which in turn defines the geometry of the membrane skeleton (By similarity). {ECO:0000250}.	UTMOD	tropomodulin 3
RRM2B	-1	1	-1.13	1	50484	RRM2B	Plays a pivotal role in cell survival by repairing damaged DNA in a p53/TP53-dependent manner. Supplies deoxyribonucleotides for DNA repair in cells arrested at G1 or G2. Contains an iron-tyrosyl free radical center required for catalysis. Forms an active ribonucleotide reductase (RNR) complex with RRM1 which is expressed both in resting and proliferating cells in response to DNA damage. {ECO:000…	p53R2	ribonucleotide reductase regulatory TP53 inducible subunit M2B
HIATL1	-1	1	-1.08	1	84641	MFSD14B	NA	FLJ14753;HIATL1	major facilitator superfamily domain containing 14B
MREG	-1	1	-1.06	1	55686	MREG	Plays a role in the incorporation of pigments into hair. May function in membrane fusion and regulate the biogenesis of disk membranes of photoreceptor rod cells (By similarity). {ECO:0000250}.	FLJ10116;DSU;WDT2	melanoregulin
TNF	-1	1	-0.89	1	7124	TNF	Cytokine that binds to TNFRSF1A/TNFR1 and TNFRSF1B/TNFBR. It is mainly secreted by macrophages and can induce cell death of certain tumor cell lines. It is potent pyrogen causing fever by direct action or by stimulation of interleukin-1 secretion and is implicated in the induction of cachexia, Under certain conditions it can stimulate cell proliferation and induce cell differentiation. Impairs re…	TNFSF2;DIF;TNF-alpha;TNFA	tumor necrosis factor
A4GNT	-1	1	-0.89	1	51146	A4GNT	Catalyzes the transfer of N-acetylglucosamine (GlcNAc) to core 2 branched O-glycans (PubMed:10430883). Necessary for the synthesis of type III mucin which is specifically produced in the stomach, duodenum, and pancreatic duct (PubMed:10430883). May protect against inflammation-associated gastric adenocarcinomas (By similarity). {ECO:0000250|UniProtKB:Q14BT6, ECO:0000269|PubMed:10430883}.	alpha4GnT	alpha-1,4-N-acetylglucosaminyltransferase
LETM2	-1	1	-0.81	1	137994	LETM2	NA	FLJ25409;SLC55A2	leucine zipper and EF-hand containing transmembrane protein 2
SAP130	-1	1	-0.64	1	79595	SAP130	Acts as a transcriptional repressor. May function in the assembly and/or enzymatic activity of the mSin3A corepressor complex or in mediating interactions between the complex and other regulatory complexes. {ECO:0000269|PubMed:12724404}.	FLJ12761	Sin3A associated protein 130
ST8SIA5	-1	1	-0.61	1	29906	ST8SIA5	May be involved in the synthesis of gangliosides GD1c, GT1a, GQ1b and GT3 from GD1a, GT1b, GM1b and GD3 respectively. {ECO:0000269|PubMed:9199191}.	SIAT8E	ST8 alpha-N-acetyl-neuraminide alpha-2,8-sialyltransferase 5
YBX3	-1	1	-0.61	1	8531	YBX3	Binds to the GM-CSF promoter. Seems to act as a repressor. Binds also to full-length mRNA and to short RNA sequences containing the consensus site 5'-UCCAUCA-3'. May have a role in translation repression (By similarity). {ECO:0000250}.	dbpA;ZONAB;CSDA1;CSDA	Y-box binding protein 3
TIAM2	-1	1	-0.58	1	26230	TIAM2	Modulates the activity of RHO-like proteins and connects extracellular signals to cytoskeletal activities. Acts as a GDP- dissociation stimulator protein that stimulates the GDP-GTP exchange activity of RHO-like GTPases and activates them. Mediates extracellular laminin signals to activate Rac1, contributing to neurite growth. Involved in lamellipodial formation and advancement of the growth cone…	STEF	T cell lymphoma invasion and metastasis 2
UROD	-1	1	-0.56	1	7389	UROD	Catalyzes the decarboxylation of four acetate groups of uroporphyrinogen-III to yield coproporphyrinogen-III.	NA	uroporphyrinogen decarboxylase
CSRNP3	-1	1	-0.53	1	80034	CSRNP3	Binds to the consensus sequence 5'-AGAGTG-3' and has transcriptional activator activity. Plays a role in apoptosis (By similarity). {ECO:0000250}.	FLJ32093;TAIP-2;PPP1R73;FAM130A2	cysteine and serine rich nuclear protein 3
VGF	-1	1	-0.47	1	7425	VGF	May be involved in the regulation of cell-cell interactions or in synatogenesis during the maturation of the nervous system. {ECO:0000250}. Antimicrobial peptide VGF[554-577]: Has bactericidal activity against M. luteus, and antifungal activity against P. Pastoris. {ECO:0000269|PubMed:23250050}.	SCG7;SgVII	VGF nerve growth factor inducible
SMCO4	-1	1	-0.46	1	56935	SMCO4	NA	FN5;C11orf75	single-pass membrane protein with coiled-coil domains 4
EXTL1	-1	1	-0.45	1	2134	EXTL1	Probable glycosyltransferase. {ECO:0000250}.	EXTL;MGC70794	exostosin like glycosyltransferase 1
COLCA1	-1	1	-0.18	1	399948	NA	NA	NA	NA
ASXL1	-1	1	-0.17	1	171023	ASXL1	Probable Polycomb group (PcG) protein involved in transcriptional regulation mediated by ligand-bound nuclear hormone receptors, such as retinoic acid receptors (RARs) and peroxisome proliferator-activated receptor gamma (PPARG). Acts as coactivator of RARA and RXRA through association with NCOA1. Acts as corepressor for PPARG and suppresses its adipocyte differentiation-inducing activity (By sim…	KIAA0978	ASXL transcriptional regulator 1
DVL3	-1	1	-0.01	1	1857	DVL3	Involved in the signal transduction pathway mediated by multiple Wnt genes. {ECO:0000250|UniProtKB:Q61062}.	KIAA0208	dishevelled segment polarity protein 3
WHSC1	-1	1	0	1	7468	NSD2	Histone methyltransferase with histone H3 'Lys-27' (H3K27me) methyltransferase activity. Isoform 2 may act as a transcription regulator that binds DNA and suppresses IL5 transcription through HDAC recruitment. {ECO:0000269|PubMed:11152655, ECO:0000269|PubMed:16115125, ECO:0000269|PubMed:18172012}.	MMSET;KMT3G;WHSC1	nuclear receptor binding SET domain protein 2
SAMD1	-1	1	0.02	1	90378	SAMD1	May play a role in atherogenesis by immobilizing LDL in the atherial wall. {ECO:0000269|PubMed:16159594}.	NA	sterile alpha motif domain containing 1
PRAMEF11	-1	1	0.06	1	440560	PRAMEF11	NA	NA	PRAME family member 11
KLHDC7B	-1	1	0.09	1	113730	KLHDC7B	NA	MGC16635	kelch domain containing 7B
MTL5	-1	1	0.14	1	9633	TESMIN	May have a role in spermatogenesis. {ECO:0000305}.	CXCDC2;MTL5	testis expressed metallothionein like protein
EMP1	-1	1	0.36	1	2012	EMP1	NA	TMP;CL-20	epithelial membrane protein 1
ZNF829	-1	1	0.36	1	374899	ZNF829	May be involved in transcriptional regulation.	DKFZp779O175	zinc finger protein 829
PGAP1	-1	1	0.41	1	80055	PGAP1	Involved in inositol deacylation of GPI-anchored proteins. GPI inositol deacylation may important for efficient transport of GPI-anchored proteins from the endoplasmic reticulum to the Golgi (By similarity). {ECO:0000250}.	FLJ12377;Bst1;SPG67	post-GPI attachment to proteins 1
CDC42EP3	-0.99	1	-1.5	1	10602	CDC42EP3	Probably involved in the organization of the actin cytoskeleton. May act downstream of CDC42 to induce actin filament assembly leading to cell shape changes. Induces pseudopodia formation in fibroblasts. {ECO:0000269|PubMed:10490598, ECO:0000269|PubMed:11035016}.	CEP3;UB1;BORG2	CDC42 effector protein 3
HGC6.3	-0.99	1	-1.22	1	100128124	NA	NA	NA	NA
TTC36	-0.99	1	-0.93	1	143941	TTC36	NA	HBP21	tetratricopeptide repeat domain 36
C7orf34	-0.99	1	-0.86	1	135927	LLCFC1	NA	CTM-1;C7orf34	LLLL and CFNLAS motif containing 1
ZFYVE20	-0.99	1	-0.86	1	64145	RBSN	Rab4/Rab5 effector protein acting in early endocytic membrane fusion and membrane trafficking of recycling endosomes. Required for endosome fusion either homotypically or with clathrin coated vesicles. Plays a role in the lysosomal trafficking of CTSD/cathepsin D from the Golgi to lysosomes. Also promotes the recycling of transferrin directly from early endosomes to the plasma membrane. Binds pho…	ZFYVE20	rabenosyn, RAB effector
SYNC	-0.99	1	-0.72	1	81493	SYNC	Atypical type III intermediate filament (IF) protein that may play a supportive role in the efficient coupling of mechanical stress between the myofibril and fiber exterior. May facilitate lateral force transmission during skeletal muscle contraction. Does not form homofilaments nor heterofilaments with other IF proteins. {ECO:0000250|UniProtKB:Q9EPM5}.	SYNCOILIN;SYNC1	syncoilin, intermediate filament protein
BCL2	-0.99	1	-0.69	1	596	BCL2	Suppresses apoptosis in a variety of cell systems including factor-dependent lymphohematopoietic and neural cells. Regulates cell death by controlling the mitochondrial membrane permeability. Appears to function in a feedback loop system with caspases. Inhibits caspase activity either by preventing the release of cytochrome c from the mitochondria and/or by binding to the apoptosis-activating fac…	Bcl-2;PPP1R50	BCL2, apoptosis regulator
ABCG5	-0.99	1	-0.63	1	64240	ABCG5	ABCG5 and ABCG8 form an obligate heterodimer that mediates Mg(2+)- and ATP-dependent sterol transport across the cell membrane (PubMed:27144356). Plays an essential role in the selective transport of dietary plant sterols and cholesterol in and out of the enterocytes and in the selective sterol excretion by the liver into bile (PubMed:11099417, PubMed:11138003, PubMed:27144356, PubMed:15054092). …	STSL	ATP binding cassette subfamily G member 5
SV2B	-0.99	1	-0.63	1	9899	SV2B	Probably plays a role in the control of regulated secretion in neural and endocrine cells. {ECO:0000250}.	KIAA0735;HsT19680	synaptic vesicle glycoprotein 2B
ADPRM	-0.99	1	-0.54	1	56985	ADPRM	Hydrolyzes ADP-ribose, IDP-ribose, CDP-glycerol, CDP- choline and CDP-ethanolamine, but not other non-reducing ADP- sugars or CDP-glucose. May be involved in immune cell signaling as suggested by the second-messenger role of ADP-ribose, which activates TRPM2 as a mediator of oxidative/nitrosative stress (By similarity). {ECO:0000250}.	MDS006;C17orf48	ADP-ribose/CDP-alcohol diphosphatase, manganese dependent
C20orf27	-0.99	1	-0.43	1	54976	C20orf27	NA	FLJ20550	chromosome 20 open reading frame 27
BMP10	-0.99	1	-0.36	1	27302	BMP10	Required for maintaining the proliferative activity of embryonic cardiomyocytes by preventing premature activation of the negative cell cycle regulator CDKN1C/p57KIP and maintaining the required expression levels of cardiogenic factors such as MEF2C and NKX2-5. Acts as a ligand for ACVRL1/ALK1, BMPR1A/ALK3 and BMPR1B/ALK6, leading to activation of SMAD1, SMAD5 and SMAD8 transcription factors. Inh…	NA	bone morphogenetic protein 10
CXCL10	-0.99	1	-0.26	1	3627	CXCL10	Chemotactic for monocytes and T-lymphocytes. Binds to CXCR3.	IFI10;IP-10;crg-2;mob-1;C7;gIP-10;INP10;SCYB10	C-X-C motif chemokine ligand 10
LYVE1	-0.99	1	-0.25	1	10894	LYVE1	Ligand-specific transporter trafficking between intracellular organelles (TGN) and the plasma membrane. Plays a role in autocrine regulation of cell growth mediated by growth regulators containing cell surface retention sequence binding (CRS). May act as a hyaluronan (HA) transporter, either mediating its uptake for catabolism within lymphatic endothelial cells themselves, or its transport into t…	LYVE-1;XLKD1	lymphatic vessel endothelial hyaluronan receptor 1
RPL17	-0.99	1	-0.16	1	6139	RPL17	Component of the large ribosomal subunit. {ECO:0000305|PubMed:12962325}.	rpL23;L17	ribosomal protein L17
CHMP7	-0.99	1	-0.13	1	91782	CHMP7	ESCRT-III-like protein required to recruit the ESCRT-III complex to the nuclear envelope during late anaphase (PubMed:26040712). Together with SPAST, the ESCRT-III complex promotes nuclear envelope sealing and mitotic spindle disassembly during late anaphase (PubMed:26040712). Plays a role in the endosomal sorting pathway (PubMed:16856878). {ECO:0000269|PubMed:16856878, ECO:0000269|PubMed:2604071…	MGC29816	charged multivesicular body protein 7
MT1HL1	-0.99	1	-0.09	1	645745	MT1HL1	Metallothioneins have a high content of cysteine residues that bind various heavy metals; these proteins are transcriptionally regulated by both heavy metals and glucocorticoids. {ECO:0000250}.	MT1P2	metallothionein 1H like 1
EXTL3	-0.99	1	-0.06	1	2137	EXTL3	Glycosyltransferase which regulates the biosynthesis of heparan sulfate (HS). Important for both skeletal development and hematopoiesis, through the formation of HS proteoglycans (HSPGs) (PubMed:28132690, PubMed:28148688). Required for the function of REG3A in regulating keratinocyte proliferation and differentiation (PubMed:22727489). {ECO:0000269|PubMed:22727489, ECO:0000269|PubMed:28132690, EC…	botv;REGR	exostosin like glycosyltransferase 3
CEP135	-0.99	1	0.02	1	9662	CEP135	Centrosomal protein involved in centriole biogenesis. Acts as a scaffolding protein during early centriole biogenesis. Required for the targeting of centriole satellite proteins to centrosomes such as of PCM1, SSX2IP and CEP290 and recruitment of WRAP73 to centrioles. Also required for centriole-centriole cohesion during interphase by acting as a platform protein for CEP250 at the centriole. {ECO…	FLJ13621;KIAA0635;CEP4	centrosomal protein 135
DNAH17	-0.99	1	0.09	1	8632	DNAH17	NA	DNEL2;FLJ40457;DNAHL1	dynein axonemal heavy chain 17
OR2H1	-0.99	1	0.15	1	26716	OR2H1	Odorant receptor. {ECO:0000305}.	OR6-2;OR2H6;OR2H8	olfactory receptor family 2 subfamily H member 1
TNFAIP3	-0.99	1	0.18	1	7128	TNFAIP3	Ubiquitin-editing enzyme that contains both ubiquitin ligase and deubiquitinase activities. Involved in immune and inflammatory responses signaled by cytokines, such as TNF-alpha and IL-1 beta, or pathogens via Toll-like receptors (TLRs) through terminating NF-kappa-B activity. Essential component of a ubiquitin-editing protein complex, comprising also RNF11, ITCH and TAX1BP1, that ensures the tr…	A20;OTUD7C	TNF alpha induced protein 3
DIRC2	-0.99	1	0.27	1	84925	SLC49A4	Electrogenic metabolite transporter. {ECO:0000269|PubMed:21692750}.	FLJ14784;RCC4;DIRC2	solute carrier family 49 member 4
ZNF337	-0.99	1	0.41	1	26152	ZNF337	May be involved in transcriptional regulation.	dJ694B14.1	zinc finger protein 337
SLC16A14	-0.99	1	1.21	1	151473	SLC16A14	Proton-linked monocarboxylate transporter. May catalyze the transport of monocarboxylates across the plasma membrane. {ECO:0000250}.	FLJ30794;MCT14	solute carrier family 16 member 14
MAPK3	-0.98	1	-1.22	1	5595	MAPK3	Serine/threonine kinase which acts as an essential component of the MAP kinase signal transduction pathway. MAPK1/ERK2 and MAPK3/ERK1 are the 2 MAPKs which play an important role in the MAPK/ERK cascade. They participate also in a signaling cascade initiated by activated KIT and KITLG/SCF. Depending on the cellular context, the MAPK/ERK cascade mediates diverse biological functions such as cell g…	ERK1;p44mapk;p44erk1;PRKM3	mitogen-activated protein kinase 3
VDR	-0.98	1	-1.13	1	7421	VDR	Nuclear receptor for calcitriol, the active form of vitamin D3 which mediates the action of this vitamin on cells. Enters the nucleus upon vitamin D3 binding where it forms heterodimers with the retinoid X receptor/RXR. The VDR-RXR heterodimers bind to specific response elements on DNA and activate the transcription of vitamin D3-responsive target genes. Recruited to promoters via its interaction…	NR1I1;PPP1R163	vitamin D receptor
MYF6	-0.98	1	-1.11	1	4618	MYF6	Involved in muscle differentiation (myogenic factor). Induces fibroblasts to differentiate into myoblasts. Probable sequence specific DNA-binding protein.	MRF4;bHLHc4	myogenic factor 6
CHD3	-0.98	1	-1.07	1	1107	CHD3	Component of the histone deacetylase NuRD complex which participates in the remodeling of chromatin by deacetylating histones. Required for anchoring centrosomal pericentrin in both interphase and mitosis, for spindle organization and centrosome integrity. {ECO:0000269|PubMed:17626165, ECO:0000269|PubMed:9804427}.	Mi-2a;ZFH;Mi2-ALPHA	chromodomain helicase DNA binding protein 3
DIP2B	-0.98	1	-0.92	1	57609	DIP2B	NA	KIAA1463;FLJ34278	disco interacting protein 2 homolog B
ST6GALNAC6	-0.98	1	-0.79	1	30815	ST6GALNAC6	Alpha-2,6-sialyltransferase involved in the synthesis of alpha-series gangliosides. Has activity toward GD1a, GT1b and GM1b. Has no activity toward glycoproteins. Responsible for the biosynthesis of DSGG (disialylgalactosylgloboside) from MSGG (monosialylgalactosylgloboside) in normal and malignant kidney. Participates in the synthesis of disialyl Lewis a (Le(a)). {ECO:0000269|PubMed:12668675, EC…	ST6GALNACVI;SIAT7F	ST6 N-acetylgalactosaminide alpha-2,6-sialyltransferase 6
EEF1A1	-0.98	1	-0.52	1	1915	EEF1A1	This protein promotes the GTP-dependent binding of aminoacyl-tRNA to the A-site of ribosomes during protein biosynthesis. With PARP1 and TXK, forms a complex that acts as a T helper 1 (Th1) cell-specific transcription factor and binds the promoter of IFN-gamma to directly regulate its transcription, and is thus involved importantly in Th1 cytokine production. {ECO:0000269|PubMed:17177976}.	EE1A1;EF1A;EEF1A;LENG7	eukaryotic translation elongation factor 1 alpha 1
OR5M9	-0.98	1	-0.38	1	390162	OR5M9	Odorant receptor. {ECO:0000305}.	NA	olfactory receptor family 5 subfamily M member 9
CAPN11	-0.98	1	-0.32	1	11131	CAPN11	Calcium-regulated non-lysosomal thiol-protease which catalyzes limited proteolysis of substrates involved in cytoskeletal remodeling and signal transduction.	NA	calpain 11
GPR62	-0.98	1	-0.27	1	118442	GPR62	Orphan receptor.	NA	G protein-coupled receptor 62
TTC5	-0.98	1	-0.25	1	91875	TTC5	Adapter protein involved in p53/TP53 response that acts by regulating and mediating the assembly of multi-protein complexes. Required to facilitate the interaction between JMY and p300/EP300 and increase p53/TP53-dependent transcription and apoptosis. Prevents p53/TP53 degradation by MDM2 (By similarity). {ECO:0000250}.	Strap	tetratricopeptide repeat domain 5
JOSD1	-0.98	1	-0.23	1	9929	JOSD1	Deubiquitinates monoubiquitinated probes (in vitro). When ubiquitinated, cleaves 'Lys-63'-linked and 'Lys-48'-linked poly-ubiquitin chains (in vitro), hence may act as a deubiquitinating enzyme. May increase macropinocytosis and suppress clathrin- and caveolae-mediated endocytosis. May enhance membrane dynamics and cell motility independently of its catalytic activity. {ECO:0000269|PubMed:2111880…	KIAA0063	Josephin domain containing 1
APOA5	-0.98	1	-0.21	1	116519	APOA5	Minor apolipoprotein mainly associated with HDL and to a lesser extent with VLDL. May also be associated with chylomicrons. Important determinant of plasma triglyceride (TG) levels by both being a potent stimulator of apo-CII lipoprotein lipase (LPL) TG hydrolysis and a inhibitor of the hepatic VLDL-TG production rate (without affecting the VLDL-apoB production rate) (By similarity). Activates po…	RAP3;APOA-V	apolipoprotein A5
WSCD2	-0.98	1	-0.18	1	9671	WSCD2	NA	KIAA0789	WSC domain containing 2
INSL5	-0.98	1	-0.16	1	10022	INSL5	May have a role in gut contractility or in thymic development and regulation. Activates RXFP4 with high potency and appears to be the endogenous ligand for this receptor.	NA	insulin like 5
TMED1	-0.98	1	-0.12	1	11018	TMED1	Potential role in vesicular protein trafficking, mainly in the early secretory pathway. May act as a cargo receptor at the lumenal side for incorporation of secretory cargo molecules into transport vesicles and may be involved in vesicle coat formation at the cytoplasmic side.	ST2L;MGC1270;IL1RL1LG;Il1rl1l;p24gamma1;p24g1	transmembrane p24 trafficking protein 1
HLA-DQA2	-0.98	1	-0.07	1	3118	HLA-DQA2	Binds peptides derived from antigens that access the endocytic route of antigen presenting cells (APC) and presents them on the cell surface for recognition by the CD4 T-cells. The peptide binding cleft accommodates peptides of 10-30 residues. The peptides presented by MHC class II molecules are generated mostly by degradation of proteins that access the endocytic route, where they are processed …	HLA-DXA	major histocompatibility complex, class II, DQ alpha 2
ZXDB	-0.98	1	-0.07	1	158586	ZXDB	Cooperates with CIITA to promote transcription of MHC class I and MHC class II genes. {ECO:0000250}.	ZNF905	zinc finger X-linked duplicated B
CYLC2	-0.98	1	-0.07	1	1539	CYLC2	Possible architectural role during spermatogenesis. May be involved in spermatid differentiation.	NA	cylicin 2
CCDC3	-0.98	1	-0.06	1	83643	CCDC3	Negatively regulates TNF-alpha-induced pro-inflammatory response in endothelial cells (ECs) via inhibition of TNF-alpha- induced NF-kappaB activation in ECs (PubMed:25193116). Positively regulates lipid accumulation in adipose cells (By similarity). {ECO:0000250|UniProtKB:Q9D6Y1, ECO:0000269|PubMed:25193116}.	DKFZp761F241	coiled-coil domain containing 3
ITGB4	-0.98	1	-0.05	1	3691	ITGB4	Integrin alpha-6/beta-4 is a receptor for laminin. Plays a critical structural role in the hemidesmosome of epithelial cells. Is required for the regulation of keratinocyte polarity and motility. ITGA6:ITGB4 binds to NRG1 (via EGF domain) and this binding is essential for NRG1-ERBB signaling (PubMed:20682778). ITGA6:ITGB4 binds to IGF1 and this binding is essential for IGF1 signaling (PubMed:2235…	CD104	integrin subunit beta 4
KLC1	-0.98	1	0.03	1	3831	KLC1	Kinesin is a microtubule-associated force-producing protein that may play a role in organelle transport. The light chain may function in coupling of cargo to the heavy chain or in the modulation of its ATPase activity.	KNS2A;KLC;hKLC1S;hKLC1N;hKLC1P;hKLC1G;hKLC1R;hKLC1J;hKLC1B;KNS2	kinesin light chain 1
SPAG8	-0.98	1	0.11	1	26206	SPAG8	Plays a role in spermatogenesis by enhancing the binding of CREM isoform tau to its coactivator FHL5 and increasing the FHL5-regulated transcriptional activation of CREM isoform tau (By similarity). Involved in the acrosome reaction and in binding of sperm to the zona pellucida (By similarity). Plays a role in regulation of the cell cycle by controlling progression through the G2/M phase, possibl…	hSMP-1;HSD-1;BS-84;SPAG3;CT142	sperm associated antigen 8
FAM194B	-0.98	1	0.2	1	220081	ERICH6B	NA	FLJ32682;FAM194B	glutamate rich 6B
ACTRT3	-0.98	1	0.22	1	84517	ACTRT3	NA	ARPM1	actin related protein T3
ANP32B	-0.98	1	0.31	1	10541	ANP32B	Multifunctional protein working as a cell cycle progression factor as well as a cell survival factor. Required for the progression from the G1 to the S phase. Anti-apoptotic protein which functions as a caspase-3 inhibitor. Has no phosphatase 2A (PP2A) inhibitor activity (By similarity). Exhibits histone chaperone properties, stimulating core histones to assemble into a nucleosome. {ECO:0000250, …	SSP29;PHAPI2;APRIL	acidic nuclear phosphoprotein 32 family member B
GRN	-0.98	1	0.32	1	2896	GRN	Granulins have possible cytokine-like activity. They may play a role in inflammation, wound repair, and tissue remodeling.	PCDGF;PGRN;CLN11	granulin precursor
MATR3	-0.98	1	0.35	1	9782	MATR3	May play a role in transcription or may interact with other nuclear matrix proteins to form the internal fibrogranular network. In association with the SFPQ-NONO heteromer may play a role in nuclear retention of defective RNAs. Plays a role in the regulation of DNA virus-mediated innate immune response by assembling into the HDP-RNP complex, a complex that serves as a platform for IRF3 phosphoryl…	KIAA0723;MGC9105;VCPDM;MPD2	matrin 3
TBC1D26	-0.98	1	0.56	1	353149	TBC1D26	May act as a GTPase-activating protein for Rab family protein(s). {ECO:0000305}.	MGC51025	TBC1 domain family member 26
DNAJC2	-0.98	1	0.65	1	27000	DNAJC2	Acts both as a chaperone in the cytosol and as a chromatin regulator in the nucleus. When cytosolic, acts as a molecular chaperone: component of the ribosome-associated complex (RAC), a complex involved in folding or maintaining nascent polypeptides in a folding-competent state. In the RAC complex, stimulates the ATPase activity of the ribosome-associated pool of Hsp70-type chaperones HSPA14 that…	MPP11;MPHOSPH11;ZUO1;zuotin;ZRF1	DnaJ heat shock protein family (Hsp40) member C2
ERCC6L2	-0.98	1	0.71	1	375748	ERCC6L2	May be involved in early DNA damage response. {ECO:0000269|PubMed:24507776}.	FLJ37706;RAD26L;C9orf102	ERCC excision repair 6 like 2
OR5H2	-0.98	1	0.96	1	79310	OR5H2	Odorant receptor. {ECO:0000305}.	NA	olfactory receptor family 5 subfamily H member 2
KHNYN	-0.97	1	-1.42	1	23351	KHNYN	NA	KIAA0323	KH and NYN domain containing
TBCEL	-0.97	1	-1.24	1	219899	TBCEL	Acts as a regulator of tubulin stability. {ECO:0000269|PubMed:15728251}.	MGC10233;LRRC35	tubulin folding cofactor E like
TUBB1	-0.97	1	-1.07	1	81027	TUBB1	Tubulin is the major constituent of microtubules. It binds two moles of GTP, one at an exchangeable site on the beta chain and one at a non-exchangeable site on the alpha chain (By similarity). {ECO:0000250}.	dJ543J19.4	tubulin beta 1 class VI
S100Z	-0.97	1	-1.04	1	170591	S100Z	NA	Gm625;S100-zeta	S100 calcium binding protein Z
IBTK	-0.97	1	-0.96	1	25998	IBTK	Acts as an inhibitor of BTK tyrosine kinase activity, thereby playing a role in B-cell development. Down-regulates BTK kinase activity, leading to interference with BTK-mediated calcium mobilization and NF-kappa-B-driven transcription. {ECO:0000269|PubMed:11577348}.	DKFZP564B116;BTBD26;BTKI	inhibitor of Bruton tyrosine kinase
MFSD7	-0.97	1	-0.92	1	84179	SLC49A3	NA	FLJ22269;LP2561;MFSD7	solute carrier family 49 member 3
FAM71E2	-0.97	1	-0.89	1	284418	FAM71E2	NA	DKFZp434G1729;C19orf16	family with sequence similarity 71 member E2
EMC10	-0.97	1	-0.82	1	284361	EMC10	NA	INM02;HSS1;HSM1;C19orf63	ER membrane protein complex subunit 10
COG6	-0.97	1	-0.8	1	57511	COG6	Required for normal Golgi function. {ECO:0000250}.	COD2;KIAA1134	component of oligomeric golgi complex 6
MAP3K4	-0.97	1	-0.69	1	4216	MAP3K4	Component of a protein kinase signal transduction cascade. Activates the CSBP2, P38 and JNK MAPK pathways, but not the ERK pathway. Specifically phosphorylates and activates MAP2K4 and MAP2K6. {ECO:0000269|PubMed:12052864, ECO:0000269|PubMed:9305639}.	MTK1;MAPKKK4;KIAA0213;MEKK4	mitogen-activated protein kinase kinase kinase 4
HYAL4	-0.97	1	-0.6	1	23553	HYAL4	Endo-hyaluronidase that degrades hyaluronan to smaller oligosaccharide fragments. Has also chondroitin sulfate hydrolase activity, The best substrate being the galactosaminidic linkage in the sequence of a trisulfated tetrasaccharide. {ECO:0000269|PubMed:16104017, ECO:0000269|PubMed:19889881}.	NA	hyaluronidase 4
PPP1R1B	-0.97	1	-0.47	1	84152	PPP1R1B	Inhibitor of protein-phosphatase 1.	DARPP-32;FLJ20940	protein phosphatase 1 regulatory inhibitor subunit 1B
ANO10	-0.97	1	-0.47	1	55129	ANO10	Does not exhibit calcium-activated chloride channel (CaCC) activity. Can inhibit the activity of ANO1. {ECO:0000269|PubMed:20056604, ECO:0000269|PubMed:22946059}.	FLJ10375;MGC47890;SCAR10;TMEM16K	anoctamin 10
CCM2	-0.97	1	-0.46	1	83605	CCM2	Component of the CCM signaling pathway which is a crucial regulator of heart and vessel formation and integrity. May act through the stabilization of endothelial cell junctions (By similarity). May function as a scaffold protein for MAP2K3-MAP3K3 signaling. Seems to play a major role in the modulation of MAP3K3- dependent p38 activation induced by hyperosmotic shock (By similarity). {ECO:0000250}.	MGC4607;OSM;C7orf22	CCM2 scaffold protein
PARP16	-0.97	1	-0.42	1	54956	PARP16	Intracellular mono-ADP-ribosyltransferase that may play a role in different processes through the mono-ADP-ribosylation of proteins involved in those processes (PubMed:23103912, PubMed:22701565). May play a role in the unfolded protein response (UPR), by ADP-ribosylating and activating EIF2AK3 and ERN1, two important UPR effectors (PubMed:23103912). May also mediate mono- ADP-ribosylation of kary…	FLJ20509;FLJ25281;pART15;C15orf30	poly(ADP-ribose) polymerase family member 16
ZNF580	-0.97	1	-0.28	1	51157	ZNF580	Involved in the regulation of endothelial cell proliferation and migration. Mediates H(2)O(2)-induced leukocyte chemotaxis by elevating interleukin-8 production and may play a role in inflammation. May be involved in transcriptional regulation. {ECO:0000269|PubMed:20382120, ECO:0000269|PubMed:21830064}.	NA	zinc finger protein 580
RGS9	-0.97	1	-0.28	1	8787	RGS9	Inhibits signal transduction by increasing the GTPase activity of G protein alpha subunits thereby driving them into their inactive GDP-bound form. Binds to GNAT1. Involved in phototransduction; key element in the recovery phase of visual transduction (By similarity). {ECO:0000250}.	PERRS;RGS9L;MGC26458;MGC111763	regulator of G protein signaling 9
FAM72B	-0.97	1	-0.23	1	653820	FAM72B	NA	RP11-439A17.6	family with sequence similarity 72 member B
MADCAM1	-0.97	1	-0.07	1	8174	MADCAM1	Cell adhesion leukocyte receptor expressed by mucosal venules, helps to direct lymphocyte traffic into mucosal tissues including the Peyer patches and the intestinal lamina propria. It can bind both integrin alpha-4/beta-7 and L-selectin, regulating both the passage and retention of leukocytes. Isoform 2, lacking the mucin-like domain, may be specialized in supporting integrin alpha-4/beta-7-depe…	MACAM1	mucosal vascular addressin cell adhesion molecule 1
HACE1	-0.97	1	-0.05	1	57531	HACE1	E3 ubiquitin-protein ligase involved in Golgi membrane fusion and regulation of small GTPases. Acts as a regulator of Golgi membrane dynamics during the cell cycle: recruited to Golgi membrane by Rab proteins and regulates postmitotic Golgi membrane fusion. Acts by mediating ubiquitination during mitotic Golgi disassembly, ubiquitination serving as a signal for Golgi reassembly later, after cell …	KIAA1320	HECT domain and ankyrin repeat containing E3 ubiquitin protein ligase 1
C1orf94	-0.97	1	-0.02	1	84970	C1orf94	NA	MGC15882	chromosome 1 open reading frame 94
GAL3ST1	-0.97	1	0.05	1	9514	GAL3ST1	Catalyzes the sulfation of membrane glycolipids. Seems to prefer beta-glycosides at the non-reducing termini of sugar chains attached to a lipid moiety. Catalyzes the synthesis of galactosylceramide sulfate (sulfatide), a major lipid component of the myelin sheath and of monogalactosylalkylacylglycerol sulfate (seminolipid), present in spermatocytes (By similarity). Also acts on lactosylceramide,…	CST	galactose-3-O-sulfotransferase 1
LST1	-0.97	1	0.08	1	7940	LST1	NA	LST-1;B144;D6S49E	leukocyte specific transcript 1
SLC2A8	-0.97	1	0.2	1	29988	SLC2A8	Insulin-regulated facilitative glucose transporter. Binds cytochalasin B in a glucose-inhibitable manner. Seems to be a dual-specific sugar transporter as it is inhibitable by fructose (By similarity). {ECO:0000250}.	GLUTX1;GLUT8	solute carrier family 2 member 8
XIAP	-0.97	1	0.42	1	331	XIAP	Multi-functional protein which regulates not only caspases and apoptosis, but also modulates inflammatory signaling and immunity, copper homeostasis, mitogenic kinase signaling, cell proliferation, as well as cell invasion and metastasis. Acts as a direct caspase inhibitor. Directly bind to the active site pocket of CASP3 and CASP7 and obstructs substrate entry. Inactivates CASP9 by keeping it in…	hILP;API3;BIRC4	X-linked inhibitor of apoptosis
GTF2A2	-0.97	1	0.92	1	2958	GTF2A2	TFIIA is a component of the transcription machinery of RNA polymerase II and plays an important role in transcriptional activation. TFIIA in a complex with TBP mediates transcriptional activity. {ECO:0000269|PubMed:11030333}.	TFIIA;HsT18745	general transcription factor IIA subunit 2
TMPPE	-0.97	1	0.98	1	643853	TMPPE	NA	FLJ45032	transmembrane protein with metallophosphoesterase domain
DRD5	-0.96	1	-1.26	1	1816	DRD5	Dopamine receptor whose activity is mediated by G proteins which activate adenylyl cyclase. {ECO:0000269|PubMed:1834671}.	DRD1B;DRD1L2	dopamine receptor D5
TBC1D3	-0.96	1	-1.14	1	729873	TBC1D3	Acts as a GTPase activating protein for RAB5. Does not act on RAB4 or RAB11 (By similarity). {ECO:0000250}.	TBC1D3A;DKFZp434P2235;PRC17	TBC1 domain family member 3
RASEF	-0.96	1	-1.14	1	158158	RASEF	Binds predominantly GDP, and also GTP. {ECO:0000269|PubMed:17448446}.	FLJ31614;RAB45	RAS and EF-hand domain containing
TRIM39	-0.96	1	-1.07	1	56658	TRIM39	E3 ubiquitin-protein ligase. May facilitate apoptosis by inhibiting APC/C-Cdh1-mediated poly-ubiquitination and subsequent proteasome-mediated degradation of the pro-apoptotic protein MOAP1. {ECO:0000269|PubMed:19100260, ECO:0000269|PubMed:22529100}.	RNF23	tripartite motif containing 39
NPL	-0.96	1	-1.02	1	80896	NPL	Catalyzes the cleavage of N-acetylneuraminic acid (sialic acid) to form pyruvate and N-acetylmannosamine via a Schiff base intermediate. It prevents sialic acids from being recycled and returning to the cell surface. Involved in the N- glycolylneuraminic acid (Neu5Gc) degradation pathway. Although human is not able to catalyze formation of Neu5Gc due to the inactive CMAHP enzyme, Neu5Gc is presen…	NPL1;DHDPS1;C1orf13	N-acetylneuraminate pyruvate lyase
IL1A	-0.96	1	-0.97	1	3552	IL1A	Produced by activated macrophages, IL-1 stimulates thymocyte proliferation by inducing IL-2 release, B-cell maturation and proliferation, and fibroblast growth factor activity. IL-1 proteins are involved in the inflammatory response, being identified as endogenous pyrogens, and are reported to stimulate the release of prostaglandin and collagenase from synovial cells.	IL1F1;IL-1A;IL1-ALPHA;IL1	interleukin 1 alpha
SYNPO	-0.96	1	-0.77	1	11346	SYNPO	Actin-associated protein that may play a role in modulating actin-based shape and motility of dendritic spines and renal podocyte foot processes. Seems to be essential for the formation of spine apparatuses in spines of telencephalic neurons, which is involved in synaptic plasticity (By similarity). {ECO:0000250}.	KIAA1029	synaptopodin
SV2A	-0.96	1	-0.75	1	9900	SV2A	Plays a role in the control of regulated secretion in neural and endocrine cells, enhancing selectively low-frequency neurotransmission. Positively regulates vesicle fusion by maintaining the readily releasable pool of secretory vesicles (By similarity). {ECO:0000250}.	SV2;KIAA0736	synaptic vesicle glycoprotein 2A
ZBTB7A	-0.96	1	-0.72	1	51341	ZBTB7A	Plays a key role in the instruction of early lymphoid progenitors to develop into B lineage by repressing T-cell instructive Notch signals (By similarity). Specifically represses the transcription of the CDKN2A gene. Efficiently abrogates E2F1- dependent CDKN2A transactivation/de-repression. Binds to the consensus sequence 5'-[GA][CA]GACCCCCCCCC-3' (By similarity). {ECO:0000250}.	FBI-1;LRF;DKFZp547O146;pokemon;ZNF857A;ZBTB7	zinc finger and BTB domain containing 7A
ZNF518B	-0.96	1	-0.72	1	85460	ZNF518B	May be involved in transcriptional regulation.	KIAA1729	zinc finger protein 518B
SFRP5	-0.96	1	-0.7	1	6425	SFRP5	Soluble frizzled-related proteins (sFRPS) function as modulators of Wnt signaling through direct interaction with Wnts. They have a role in regulating cell growth and differentiation in specific cell types. SFRP5 may be involved in determining the polarity of photoreceptor, and perhaps, other cells in the retina.	SARP3	secreted frizzled related protein 5
SPTSSB	-0.96	1	-0.64	1	165679	SPTSSB	Stimulates the activity of serine palmitoyltransferase (SPT). The composition of the serine palmitoyltransferase (SPT) complex determines the substrate preference, complexes with this subunit showing a clear preference for longer acyl-CoAs. The SPTLC1-SPTLC2-SPTSSB complex shows a strong preference for C18-CoA substrate, while the SPTLC1-SPTLC3-SPTSSB isozyme displays an ability to use a broader …	ADMP;ssSPTb;C3orf57	serine palmitoyltransferase small subunit B
TCP10L2	-0.96	1	-0.58	1	401285	TCP10L2	NA	bA517H2.3	t-complex 10 like 2
LMTK3	-0.96	1	-0.58	1	114783	LMTK3	NA	KIAA1883;LMR3;TYKLM3;PPP1R101	lemur tyrosine kinase 3
TMEM60	-0.96	1	-0.45	1	85025	TMEM60	NA	DC32;C7orf35	transmembrane protein 60
SLITRK3	-0.96	1	-0.42	1	22865	SLITRK3	Suppresses neurite outgrowth. {ECO:0000250}.	KIAA0848	SLIT and NTRK like family member 3
TMEM131	-0.96	1	-0.34	1	23505	TMEM131	May play a role in the immune response to viral infection. {ECO:0000250}.	CC28;YR-23;RW1;KIAA0257;PRO1048	transmembrane protein 131
SETD9	-0.96	1	-0.28	1	133383	SETD9	NA	MGC33648;C5orf35	SET domain containing 9
TAF7L	-0.96	1	-0.14	1	54457	TAF7L	Probably functions as a spermatogensis-specific component of the DNA-binding general transcription factor complex TFIID, a multimeric protein complex that plays a central role in mediating promoter responses to various activators and repressors. May play a role in spermatogenesis (By similarity). {ECO:0000250}.	CT40;TAF2Q	TATA-box binding protein associated factor 7 like
SLC44A4	-0.96	1	-0.1	1	80736	SLC44A4	Choline transporter that plays a role in the choline- acetylcholine system and is required to the efferent innervation of hair cells in the olivocochlear bundle for the maintenance of physiological function of outer hair cells and the protection of hair cells from acoustic injury (By similarity) (PubMed:23651124, PubMed:28013291). Also described as a thiamine pyrophosphate transporter in colon, m…	NG22;CTL4;FLJ14491;TPPT;DFNA72;C6orf29	solute carrier family 44 member 4
ADIRF	-0.96	1	-0.09	1	10974	ADIRF	Plays a role in fat cell development; promotes adipogenic differentiation and stimulates transcription initiation of master adipogenesis factors like PPARG and CEBPA at early stages of preadipocyte differentiation. Its overexpression confers resistance to the anticancer chemotherapeutic drug cisplatin. {ECO:0000269|PubMed:19444912, ECO:0000269|PubMed:23239344}.	APM2;AFRO;C10orf116	adipogenesis regulatory factor
RBM26	-0.96	1	0.1	1	64062	RBM26	NA	PRO1777;SE70-2;FLJ20957;ZC3H17;ARRS2;PPP1R132;C13orf10	RNA binding motif protein 26
ZNF778	-0.96	1	0.13	1	197320	ZNF778	May be involved in transcriptional regulation. {ECO:0000250}.	FLJ31875	zinc finger protein 778
IRGC	-0.96	1	0.19	1	56269	IRGC	NA	Iigp5;CINEMA;IRGC1	immunity related GTPase cinema
TSSC4	-0.96	1	0.19	1	10078	TSSC4	NA	NA	tumor suppressing subtransferable candidate 4
ANKAR	-0.96	1	0.24	1	150709	ANKAR	NA	FLJ25415	ankyrin and armadillo repeat containing
KLHL32	-0.96	1	0.25	1	114792	KLHL32	NA	BKLHD5;KIAA1900	kelch like family member 32
TRIM31	-0.96	1	0.28	1	11074	TRIM31	Regulator of Src-induced anchorage independent cell growth (By similarity). May have E3 ubiquitin-protein ligase activity. {ECO:0000250, ECO:0000269|PubMed:18773414}.	RNF;HCGI;C6orf13;HCG1	tripartite motif containing 31
CFL1	-0.96	1	1.27	1	1072	CFL1	Binds to F-actin and exhibits pH-sensitive F-actin depolymerizing activity. Regulates actin cytoskeleton dynamics. Important for normal progress through mitosis and normal cytokinesis. Plays a role in the regulation of cell morphology and cytoskeletal organization. Required for the up-regulation of atypical chemokine receptor ACKR2 from endosomal compartment to cell membrane, increasing its effic…	CFL	cofilin 1
CCDC59	-0.95	1	-1.47	1	29080	CCDC59	Component of the transcription complexes of the pulmonary surfactant-associated protein-B (SFTPB) and -C (SFTPC). Enhances homeobox protein Nkx-2.1-activated SFTPB and SFTPC promoter activities. {ECO:0000269|PubMed:12882447, ECO:0000269|PubMed:16630564}.	HSPC128;TAP26;BR22	coiled-coil domain containing 59
ACRC	-0.95	1	-1.34	1	93953	GCNA	NA	NAAR1;ACRC	germ cell nuclear acidic peptidase
CATSPER2	-0.95	1	-1.15	1	117155	CATSPER2	Voltage-gated calcium channel that plays a central role in calcium-dependent physiological responses essential for successful fertilization, such as sperm hyperactivation, acrosome reaction and chemotaxis towards the oocyte. {ECO:0000269|PubMed:21412338, ECO:0000269|PubMed:21412339}.	NA	cation channel sperm associated 2
MC4R	-0.95	1	-0.98	1	4160	MC4R	Receptor specific to the heptapeptide core common to adrenocorticotropic hormone and alpha-, beta-, and gamma-MSH. Plays a central role in energy homeostasis and somatic growth. This receptor is mediated by G proteins that stimulate adenylate cyclase (cAMP). {ECO:0000269|PubMed:12646665, ECO:0000269|PubMed:25163632}.	NA	melanocortin 4 receptor
SYNE1	-0.95	1	-0.85	1	23345	SYNE1	Multi-isomeric modular protein which forms a linking network between organelles and the actin cytoskeleton to maintain the subcellular spatial organization. As a component of the LINC (LInker of Nucleoskeleton and Cytoskeleton) complex involved in the connection between the nuclear lamina and the cytoskeleton. The nucleocytoplasmic interactions established by the LINC complex play an important ro…	SYNE-1B;KIAA0796;8B;Nesprin-1;enaptin;MYNE1;CPG2;dJ45H2.2;SCAR8;ARCA1;Nesp1;C6orf98	spectrin repeat containing nuclear envelope protein 1
TOR1AIP2	-0.95	1	-0.79	1	163590	TOR1AIP2	Required for endoplasmic reticulum integrity. Regulates the distribution of TOR1A between the endoplasmic reticulum and the nuclear envelope as well as induces TOR1A, TOR1B and TOR3A ATPase activity. {ECO:0000269|PubMed:19339278, ECO:0000269|PubMed:23569223, ECO:0000269|PubMed:24275647}.	LULL1;NET9;IFRG15	torsin 1A interacting protein 2
PGPEP1	-0.95	1	-0.79	1	54858	PGPEP1	Removes 5-oxoproline from various penultimate amino acid residues except L-proline. {ECO:0000269|PubMed:12651114}.	PGP-I;Pcp;PGP;PGPI	pyroglutamyl-peptidase I
EPN1	-0.95	1	-0.76	1	29924	EPN1	Binds to membranes enriched in phosphatidylinositol 4,5- bisphosphate (PtdIns(4,5)P2). Modifies membrane curvature and facilitates the formation of clathrin-coated invaginations (By similarity). Regulates receptor-mediated endocytosis. {ECO:0000250, ECO:0000269|PubMed:10557078}.	NA	epsin 1
GNAO1	-0.95	1	-0.58	1	2775	GNAO1	Guanine nucleotide-binding proteins (G proteins) are involved as modulators or transducers in various transmembrane signaling systems. The G(o) protein function is not clear. Stimulated by RGS14.	G-ALPHA-o	G protein subunit alpha o1
MIS18A	-0.95	1	-0.58	1	54069	MIS18A	Required for recruitment of CENPA to centromeres and normal chromosome segregation during mitosis. {ECO:0000269|PubMed:17199038}.	B28;FASP1;hMis18alpha;C21orf46;C21orf45	MIS18 kinetochore protein A
TRIM36	-0.95	1	-0.55	1	55521	TRIM36	E3 ubiquitin-protein ligase which mediates ubiquitination and subsequent proteasomal degradation of target proteins. Involved in chromosome segregation and cell cycle regulation (PubMed:28087737). May play a role in the acrosome reaction and fertilization. {ECO:0000250|UniProtKB:Q80WG7, ECO:0000269|PubMed:28087737}.	RBCC728;RNF98;HAPRIN	tripartite motif containing 36
GCC1	-0.95	1	-0.53	1	79571	GCC1	Probably involved in maintaining Golgi structure.	FLJ22035;GCC88;GCC1P;MGC20706	GRIP and coiled-coil domain containing 1
ADAMTS16	-0.95	1	-0.42	1	170690	ADAMTS16	NA	ADAMTS16s	ADAM metallopeptidase with thrombospondin type 1 motif 16
BCL2L2-PABPN1	-0.95	1	-0.42	1	100529063	NA	NA	NA	NA
ZNF675	-0.95	1	-0.39	1	171392	ZNF675	May be involved in transcriptional regulation. May play a role during osteoclast differentiation by modulating TRAF6 signaling activity.	TIZ;TBZF	zinc finger protein 675
NR1I3	-0.95	1	-0.39	1	9970	NR1I3	Binds and transactivates the retinoic acid response elements that control expression of the retinoic acid receptor beta 2 and alcohol dehydrogenase 3 genes. Transactivates both the phenobarbital responsive element module of the human CYP2B6 gene and the CYP3A4 xenobiotic response element.	MB67;CAR1;CAR	nuclear receptor subfamily 1 group I member 3
MTR	-0.95	1	-0.35	1	4548	MTR	Catalyzes the transfer of a methyl group from methyl- cobalamin to homocysteine, yielding enzyme-bound cob(I)alamin and methionine. Subsequently, remethylates the cofactor using methyltetrahydrofolate (By similarity). {ECO:0000250}.	cblG	5-methyltetrahydrofolate-homocysteine methyltransferase
SIKE1	-0.95	1	-0.34	1	80143	SIKE1	Physiological suppressor of IKK-epsilon and TBK1 that plays an inhibitory role in virus- and TLR3-triggered IRF3. Inhibits TLR3-mediated activation of interferon-stimulated response elements (ISRE) and the IFN-beta promoter. May act by disrupting the interactions of IKBKE or TBK1 with TICAM1/TRIF, IRF3 and DDX58/RIG-I. Does not inhibit NF-kappa-B activation pathways. {ECO:0000269|PubMed:16281057}.	FLJ21168;SIKE	suppressor of IKBKE 1
NBPF10	-0.95	1	-0.28	1	100132406	NBPF10	NA	AG1	NBPF member 10
CCDC109B	-0.95	1	-0.26	1	55013	MCUB	Negatively regulates the activity of MCU, the mitochondrial inner membrane calcium uniporter, and thereby modulates calcium uptake into the mitochondrion. Does not form functional calcium channels by itself. Mitochondrial calcium homeostasis plays key roles in cellular physiology and regulates cell bioenergetics, cytoplasmic calcium signals and activation of cell death pathways. {ECO:0000250|UniP…	FLJ20647;CCDC109B	mitochondrial calcium uniporter dominant negative beta subunit
C1QTNF5	-0.95	1	-0.22	1	114902	C1QTNF5	NA	CTRP5;DKFZp586B0621;LORD	C1q and TNF related 5
RHOXF1	-0.95	1	-0.11	1	158800	RHOXF1	Transcription factor maybe involved in reproductive processes. Modulates expression of target genes encoding proteins involved in processes relevant to spermatogenesis. {ECO:0000269|PubMed:28171660}.	OTEX;PEPP1	Rhox homeobox family member 1
CLK2	-0.95	1	-0.09	1	1196	CLK2	Dual specificity kinase acting on both serine/threonine and tyrosine-containing substrates. Phosphorylates serine- and arginine-rich (SR) proteins of the spliceosomal complex. May be a constituent of a network of regulatory mechanisms that enable SR proteins to control RNA splicing and can cause redistribution of SR proteins from speckles to a diffuse nucleoplasmic distribution. Acts as a suppres…	clk2	CDC like kinase 2
PLEKHB2	-0.95	1	-0.07	1	55041	PLEKHB2	Involved in retrograde transport of recycling endosomes. {ECO:0000269|PubMed:21911378, ECO:0000269|PubMed:22281740}.	EVT2;FLJ20783	pleckstrin homology domain containing B2
CENPH	-0.95	1	-0.06	1	64946	CENPH	Component of the CENPA-NAC (nucleosome-associated) complex, a complex that plays a central role in assembly of kinetochore proteins, mitotic progression and chromosome segregation. The CENPA-NAC complex recruits the CENPA-CAD (nucleosome distal) complex and may be involved in incorporation of newly synthesized CENPA into centromeres. Required for chromosome congression and efficiently align the c…	NA	centromere protein H
LCN15	-0.95	1	-0.01	1	389812	LCN15	NA	UNQ2541;PRO6093	lipocalin 15
ABCC1	-0.95	1	0	1	4363	ABCC1	Mediates export of organic anions and drugs from the cytoplasm. Mediates ATP-dependent transport of glutathione and glutathione conjugates, leukotriene C4, estradiol-17-beta-o- glucuronide, methotrexate, antiviral drugs and other xenobiotics. Confers resistance to anticancer drugs. Hydrolyzes ATP with low efficiency. {ECO:0000269|PubMed:10064732, ECO:0000269|PubMed:11114332, ECO:0000269|PubMed:16…	GS-X;MRP;MRP1	ATP binding cassette subfamily C member 1
KRT39	-0.95	1	0.03	1	390792	KRT39	May play a role in late hair differentiation.	KA35	keratin 39
RETN	-0.95	1	0.36	1	56729	RETN	Hormone that seems to suppress insulin ability to stimulate glucose uptake into adipose cells (By similarity). Potentially links obesity to diabetes (By similarity). Promotes chemotaxis in myeloid cells (PubMed:15064728). {ECO:0000250|UniProtKB:Q99P87, ECO:0000269|PubMed:15064728}.	FIZZ3;ADSF;RETN1	resistin
GPR63	-0.95	1	0.9	1	81491	GPR63	Orphan receptor. May play a role in brain function.	PSP24(beta);PSP24B	G protein-coupled receptor 63
PACSIN1	-0.95	1	1.39	0.931	29993	PACSIN1	Plays a role in the reorganization of the microtubule cytoskeleton via its interaction with MAPT; this decreases microtubule stability and inhibits MAPT-induced microtubule polymerization. Plays a role in cellular transport processes by recruiting DNM1, DNM2 and DNM3 to membranes. Plays a role in the reorganization of the actin cytoskeleton and in neuron morphogenesis via its interaction with COB…	SDPI	protein kinase C and casein kinase substrate in neurons 1
COL14A1	-0.95	1	1.43	0.858	7373	COL14A1	Plays an adhesive role by integrating collagen bundles. It is probably associated with the surface of interstitial collagen fibrils via COL1. The COL2 domain may then serve as a rigid arm which sticks out from the fibril and protrudes the large N-terminal globular domain into the extracellular space, where it might interact with other matrix molecules or cell surface receptors (By similarity). {E…	UND	collagen type XIV alpha 1 chain
EPHB2	-0.94	1	-0.96	1	2048	EPHB2	Receptor tyrosine kinase which binds promiscuously transmembrane ephrin-B family ligands residing on adjacent cells, leading to contact-dependent bidirectional signaling into neighboring cells. The signaling pathway downstream of the receptor is referred to as forward signaling while the signaling pathway downstream of the ephrin ligand is referred to as reverse signaling. Functions in axon guida…	Hek5;Tyro5;DRT;ERK;EPHT3	EPH receptor B2
KIAA1432	-0.94	1	-0.92	1	57589	RIC1	The RIC1-RGP1 complex acts as a guanine nucleotide exchange factor (GEF), which activates RAB6A by exchanging bound GDP for free GTP and may thereby required for efficient fusion of endosome-derived vesicles with the Golgi compartment. The RIC1- RGP1 complex participates in the recycling of mannose-6-phosphate receptors. Required for phosphorylation and localization of GJA1. {ECO:0000269|PubMed:1…	bA207C16.1;KIAA1432	RIC1 homolog, RAB6A GEF complex partner 1
C5orf48	-0.94	1	-0.76	1	389320	TEX43	NA	MGC163367;MGC163369;FLJ27505;Tseg7;C5orf48	testis expressed 43
FAM72D	-0.94	1	-0.72	1	728833	FAM72D	NA	NA	family with sequence similarity 72 member D
UBR2	-0.94	1	-0.7	1	23304	UBR2	E3 ubiquitin-protein ligase which is a component of the N-end rule pathway. Recognizes and binds to proteins bearing specific N-terminal residues that are destabilizing according to the N-end rule, leading to their ubiquitination and subsequent degradation. Plays a critical role in chromatin inactivation and chromosome-wide transcriptional silencing during meiosis via ubiquitination of histone H2…	bA49A4.1;dJ392M17.3;KIAA0349;C6orf133	ubiquitin protein ligase E3 component n-recognin 2
TXLNA	-0.94	1	-0.41	1	200081	TXLNA	May be involved in intracellular vesicle traffic and potentially in calcium-dependent exocytosis in neuroendocrine cells.	DKFZp451J0118	taxilin alpha
VRTN	-0.94	1	-0.38	1	55237	VRTN	NA	FLJ10811;vertnin;C14orf115	vertebrae development associated
ZNF679	-0.94	1	-0.33	1	168417	ZNF679	May be involved in transcriptional regulation.	MGC42415	zinc finger protein 679
IKBIP	-0.94	1	-0.32	1	121457	IKBIP	Target of p53/TP53 with pro-apoptotic function. {ECO:0000269|PubMed:15389287}.	FLJ31051;IKIP	IKBKB interacting protein
PEX1	-0.94	1	-0.29	1	5189	PEX1	Required for stability of PEX5 and protein import into the peroxisome matrix. Anchored by PEX26 to peroxisome membranes, possibly to form heteromeric AAA ATPase complexes required for the import of proteins into peroxisomes.	ZWS1;ZWS	peroxisomal biogenesis factor 1
HSF5	-0.94	1	-0.26	1	124535	HSF5	May act as a transcriptional factor. {ECO:0000250}.	FLJ40311	heat shock transcription factor 5
OTOGL	-0.94	1	-0.24	1	283310	OTOGL	NA	FLJ90579;C12orf64	otogelin like
IQCB1	-0.94	1	-0.2	1	9657	IQCB1	Involved in ciliogenesis. The function in an early step in cilia formation depends on its association with CEP290/NPHP6 (PubMed:21565611, PubMed:23446637). Involved in regulation of the BBSome complex integrity, specifically for presence of BBS2 and BBS5 in the complex, and in ciliary targeting of selected BBSome cargos. May play a role in controlling entry of the BBSome complex to cilia possibly…	KIAA0036;NPHP5;SLSN5	IQ motif containing B1
PC	-0.94	1	-0.17	1	5091	PC	Pyruvate carboxylase catalyzes a 2-step reaction, involving the ATP-dependent carboxylation of the covalently attached biotin in the first step and the transfer of the carboxyl group to pyruvate in the second. Catalyzes in a tissue specific manner, the initial reactions of glucose (liver, kidney) and lipid (adipose tissue, liver, brain) synthesis from pyruvate.	PCB	pyruvate carboxylase
ACSM2A	-0.94	1	-0.16	1	123876	ACSM2A	Has medium-chain fatty acid:CoA ligase activity with broad substrate specificity (in vitro). Acts on acids from C(4) to C(11) and on the corresponding 3-hydroxy- and 2,3- or 3,4- unsaturated acids (in vitro) (By similarity). {ECO:0000250}.	A-923A4.1;MGC150530;ACSM2	acyl-CoA synthetase medium chain family member 2A
LOC389602	-0.94	1	-0.1	1	389602	NA	NA	NA	NA
VWF	-0.94	1	-0.09	1	7450	VWF	Important in the maintenance of hemostasis, it promotes adhesion of platelets to the sites of vascular injury by forming a molecular bridge between sub-endothelial collagen matrix and platelet-surface receptor complex GPIb-IX-V. Also acts as a chaperone for coagulation factor VIII, delivering it to the site of injury, stabilizing its heterodimeric structure and protecting it from premature cleara…	F8VWF	von Willebrand factor
GLUL	-0.94	1	0	1	2752	GLUL	This enzyme has 2 functions: it catalyzes the production of glutamine and 4-aminobutanoate (gamma-aminobutyric acid, GABA), the latter in a pyridoxal phosphate-independent manner (By similarity). Essential for proliferation of fetal skin fibroblasts. {ECO:0000250, ECO:0000269|PubMed:18662667}.	GLNS	glutamate-ammonia ligase
IGSF9B	-0.94	1	0.08	1	22997	IGSF9B	Transmembrane protein which is abundantly expressed in interneurons, where it may regulate inhibitory synapse development. May mediate homophilic cell adhesion. {ECO:0000250|UniProtKB:D3ZB51, ECO:0000250|UniProtKB:E9PZ19}.	KIAA1030	immunoglobulin superfamily member 9B
SIN3A	-0.94	1	0.1	1	25942	SIN3A	Acts as a transcriptional repressor. Corepressor for REST. Interacts with MXI1 to repress MYC responsive genes and antagonize MYC oncogenic activities. Also interacts with MXD1-MAX heterodimers to repress transcription by tethering SIN3A to DNA. Acts cooperatively with OGT to repress transcription in parallel with histone deacetylation. Involved in he control of the circadian rhythms. Required fo…	KIAA0700;DKFZP434K2235	SIN3 transcription regulator family member A
HCRTR2	-0.94	1	0.16	1	3062	HCRTR2	Nonselective, high-affinity receptor for both orexin-A and orexin-B neuropeptides (PubMed:9491897, PubMed:26950369). Triggers an increase in cytoplasmic Ca(2+) levels in response to orexin-A binding (PubMed:9491897, PubMed:26950369). {ECO:0000269|PubMed:26950369, ECO:0000269|PubMed:9491897}.	OX2R	hypocretin receptor 2
VAMP8	-0.94	1	0.27	1	8673	VAMP8	SNAREs, soluble N-ethylmaleimide-sensitive factor- attachment protein receptors, are essential proteins for fusion of cellular membranes. SNAREs localized on opposing membranes assemble to form a trans-SNARE complex, an extended, parallel four alpha-helical bundle that drives membrane fusion. VAMP8 is a SNARE involved in autophagy through the direct control of autophagosome membrane fusion with t…	EDB	vesicle associated membrane protein 8
B3GNT8	-0.94	1	0.33	1	374907	B3GNT8	Beta-1,3-N-acetylglucosaminyltransferase that plays a role in the elongation of specific branch structures of multiantennary N-glycans. Has strong activity towards tetraantennary N-glycans and 2,6 triantennary glycans. {ECO:0000269|PubMed:15620693, ECO:0000269|PubMed:15917431}.	BGALT15;beta3Gn-T8;B3GALT7	UDP-GlcNAc:betaGal beta-1,3-N-acetylglucosaminyltransferase 8
ADAMTS6	-0.94	1	0.35	1	11174	ADAMTS6	NA	ADAM-TS6	ADAM metallopeptidase with thrombospondin type 1 motif 6
VKORC1	-0.94	1	0.39	1	79001	VKORC1	Involved in vitamin K metabolism. Catalytic subunit of the vitamin K epoxide reductase (VKOR) complex which reduces inactive vitamin K 2,3-epoxide to active vitamin K. Vitamin K is required for the gamma-carboxylation of various proteins, including clotting factors, and is required for normal blood coagulation, but also for normal bone development. {ECO:0000269|PubMed:14765194, ECO:0000269|PubMed…	VKCFD2	vitamin K epoxide reductase complex subunit 1
GHRHR	-0.94	1	0.4	1	2692	GHRHR	Receptor for GRF, coupled to G proteins which activate adenylyl cyclase. Stimulates somatotroph cell growth, growth hormone gene transcription and growth hormone secretion.	NA	growth hormone releasing hormone receptor
NUP210L	-0.94	1	0.6	1	91181	NUP210L	NA	NA	nucleoporin 210 like
TXLNG	-0.94	1	0.63	1	55787	TXLNG	May be involved in intracellular vesicle traffic. Inhibits ATF4-mediated transcription, possibly by dimerizing with ATF4 to form inactive dimers that cannot bind DNA. May be involved in regulating bone mass density through an ATF4-dependent pathway. May be involved in cell cycle progression. {ECO:0000269|PubMed:15911876, ECO:0000269|PubMed:18068885}.	FLJ11209;LSR5;FIAT;MGC126621;MGC126625;TXLNGX;CXorf15	taxilin gamma
KRT5	-0.94	1	0.96	1	3852	KRT5	NA	KRT5A;EBS2	keratin 5
ITPK1	-0.93	1	-1.45	1	3705	ITPK1	Kinase that can phosphorylate various inositol polyphosphate such as Ins(3,4,5,6)P4 or Ins(1,3,4)P3. Phosphorylates Ins(3,4,5,6)P4 at position 1 to form Ins(1,3,4,5,6)P5. This reaction is thought to have regulatory importance, since Ins(3,4,5,6)P4 is an inhibitor of plasma membrane Ca(2+)-activated Cl(-) channels, while Ins(1,3,4,5,6)P5 is not. Also phosphorylates Ins(1,3,4)P3 on O-5 and O-6 to f…	NA	inositol-tetrakisphosphate 1-kinase
CLGN	-0.93	1	-1.37	1	1047	CLGN	Functions during spermatogenesis as a chaperone for a range of client proteins that are important for sperm adhesion onto the egg zona pellucida and for subsequent penetration of the zona pellucida. Required for normal sperm migration from the uterus into the oviduct. Required for normal male fertility. Binds calcium ions (By similarity). {ECO:0000250}.	NA	calmegin
GPR108	-0.93	1	-1.35	1	56927	GPR108	NA	LUSTR2	G protein-coupled receptor 108
FAM150B	-0.93	1	-1.21	1	285016	ALKAL2	Ligand for receptor tyrosine kinases LTK and ALK. Stimulation of ALK signaling may be involved in regulation of cell proliferation and transformation. {ECO:0000269|PubMed:26418745, ECO:0000269|PubMed:26630010}.	AUGA;FAM150B	ALK and LTK ligand 2
PRKCH	-0.93	1	-1.16	1	5583	PRKCH	Calcium-independent, phospholipid- and diacylglycerol (DAG)-dependent serine/threonine-protein kinase that is involved in the regulation of cell differentiation in keratinocytes and pre-B cell receptor, mediates regulation of epithelial tight junction integrity and foam cell formation, and is required for glioblastoma proliferation and apoptosis prevention in MCF-7 cells. In keratinocytes, binds …	PKC-L;PKCL;PRKCL	protein kinase C eta
GUCA1A	-0.93	1	-1.12	1	2978	GUCA1A	Stimulates retinal guanylyl cyclase when free calcium ions concentration is low and inhibits guanylyl cyclase when free calcium ions concentration is elevated (PubMed:19459154). This Ca(2+)-sensitive regulation of retinal guanylyl cyclase is a key event in recovery of the dark state of rod photoreceptors following light exposure. {ECO:0000269|PubMed:19459154, ECO:0000305}.	GCAP;GCAP1;COD3;dJ139D8.6;CORD14;GUCA;GUCA1;C6orf131	guanylate cyclase activator 1A
RAB7A	-0.93	1	-1.1	1	7879	RAB7A	Key regulator in endo-lysosomal trafficking. Governs early-to-late endosomal maturation, microtubule minus-end as well as plus-end directed endosomal migration and positioning, and endosome-lysosome transport through different protein-protein interaction cascades. Plays a central role, not only in endosomal traffic, but also in many other cellular and physiological events, such as growth-factor-m…	RAB7	RAB7A, member RAS oncogene family
ANKRD54	-0.93	1	-1.08	1	129138	ANKRD54	Plays an important role in regulating intracellular signaling events associated with erythroid terminal differentiation. {ECO:0000250}.	LIAR	ankyrin repeat domain 54
ZC3H12B	-0.93	1	-1.01	1	340554	ZC3H12B	May function as RNase and regulate the levels of target RNA species. {ECO:0000305}.	MCPIP2;CXorf32	zinc finger CCCH-type containing 12B
GAST	-0.93	1	-0.9	1	2520	GAST	Gastrin stimulates the stomach mucosa to produce and secrete hydrochloric acid and the pancreas to secrete its digestive enzymes. It also stimulates smooth muscle contraction and increases blood circulation and water secretion in the stomach and intestine.	GAS	gastrin
MUC2	-0.93	1	-0.82	1	4583	MUC2	NA	NA	mucin 2, oligomeric mucus/gel-forming
CHMP1A	-0.93	1	-0.69	1	5119	CHMP1A	Probable peripherally associated component of the endosomal sorting required for transport complex III (ESCRT-III) which is involved in multivesicular bodies (MVBs) formation and sorting of endosomal cargo proteins into MVBs. MVBs contain intraluminal vesicles (ILVs) that are generated by invagination and scission from the limiting membrane of the endosome and mostly are delivered to lysosomes en…	KIAA0047;CHMP1;Vps46A;PRSM1;PCOLN3	charged multivesicular body protein 1A
TEX261	-0.93	1	-0.67	1	113419	TEX261	NA	MGC32043;TEG-261	testis expressed 261
KIF25	-0.93	1	-0.6	1	3834	KIF25	Minus-end microtubule-dependent motor protein (By similarity). Acts as a negative regulator of centrosome separation required to prevent premature centrosome separation during interphase (PubMed:28263957). Required to maintain a centered nucleus to ensure that the spindle is stably oriented at the onset of mitosis (PubMed:28263957). May also act as a negative regulator of amino acid starvation-in…	KNSL3	kinesin family member 25
DCAF15	-0.93	1	-0.44	1	90379	DCAF15	May be involved in ubiquitination and degradation through a DBB1-CUL4 E3 protein-ubiquitin ligase. {ECO:0000269|PubMed:16949367}.	MGC99481;C19orf72	DDB1 and CUL4 associated factor 15
PLRG1	-0.93	1	-0.41	1	5356	PLRG1	Component of the PRP19-CDC5L complex that forms an integral part of the spliceosome and is required for activating pre-mRNA splicing. {ECO:0000250, ECO:0000269|PubMed:11544257}.	PRL1;Prp46;PRPF46;Cwc1;TANGO4	pleiotropic regulator 1
OLIG3	-0.93	1	-0.38	1	167826	OLIG3	May determine the distinct specification program of class A neurons in the dorsal part of the spinal cord and suppress specification of class B neurons.	Bhlhb7;bHLHe20	oligodendrocyte transcription factor 3
TRIML1	-0.93	1	-0.36	1	339976	TRIML1	Probable E3 ubiquitin-protein ligase which plays an important role in blastocyst development. {ECO:0000250|UniProtKB:Q8BVP1}.	FLJ36180;RNF209	tripartite motif family like 1
SNPH	-0.93	1	-0.35	1	9751	SNPH	Inhibits SNARE complex formation by absorbing free syntaxin-1. {ECO:0000269|PubMed:10707983}.	bA314N13.5	syntaphilin
OR52E6	-0.93	1	-0.3	1	390078	OR52E6	Odorant receptor. {ECO:0000305}.	NA	olfactory receptor family 52 subfamily E member 6
RAF1	-0.93	1	-0.27	1	5894	RAF1	Serine/threonine-protein kinase that acts as a regulatory link between the membrane-associated Ras GTPases and the MAPK/ERK cascade, and this critical regulatory link functions as a switch determining cell fate decisions including proliferation, differentiation, apoptosis, survival and oncogenic transformation. RAF1 activation initiates a mitogen-activated protein kinase (MAPK) cascade that compr…	Raf-1;c-Raf;CRAF	Raf-1 proto-oncogene, serine/threonine kinase
DNAJB1	-0.93	1	-0.15	1	3337	DNAJB1	Interacts with HSP70 and can stimulate its ATPase activity. Stimulates the association between HSC70 and HIP. Negatively regulates heat shock-induced HSF1 transcriptional activity during the attenuation and recovery phase period of the heat shock response (PubMed:9499401). Stimulates ATP hydrolysis and the folding of unfolded proteins mediated by HSPA1A/B (in vitro) (PubMed:24318877). {ECO:000026…	Hsp40;Sis1;RSPH16B;HSPF1	DnaJ heat shock protein family (Hsp40) member B1
POM121L12	-0.93	1	-0.13	1	285877	POM121L12	NA	DKFZp564N2472	POM121 transmembrane nucleoporin like 12
SLC25A44	-0.93	1	-0.08	1	9673	SLC25A44	NA	FLJ90431;KIAA0446	solute carrier family 25 member 44
NBPF15	-0.93	1	-0.07	1	284565	NBPF15	NA	MGC8902;NBPF16	NBPF member 15
EFHD1	-0.93	1	-0.02	1	80303	EFHD1	Acts as a calcium sensor for mitochondrial flash (mitoflash) activation, an event characterized by stochastic bursts of superoxide production (PubMed:26975899). May play a role in neuronal differentiation (By similarity). {ECO:0000250|UniProtKB:Q9D4J1, ECO:0000269|PubMed:26975899}.	FLJ13612	EF-hand domain family member D1
PTPMT1	-0.93	1	0.05	1	114971	PTPMT1	Lipid phosphatase which dephosphorylates phosphatidylglycerophosphate (PGP) to phosphatidylglycerol (PG). PGP is an essential intermediate in the biosynthetic pathway of cardiolipin, a mitochondrial-specific phospholipid regulating the membrane integrity and activities of the organelle. Has also been shown to display phosphatase activity toward phosphoprotein substrates, specifically mediates dep…	PLIP;DUSP23;MOSP	protein tyrosine phosphatase, mitochondrial 1
GSDMA	-0.93	1	0.08	1	284110	GSDMA	May promote pyroptosis (Probable). Upon cleavage in vitro of genetically engineered GSDMA, the released N-terminal moiety binds to some types of lipids, such as possibly phosphatidylinositol (4,5)-bisphosphate. Homooligomerizes within the membrane and forms pores of 10 -15 nanometers (nm) of inner diameter, triggering cell death. Also binds to bacterial and mitochondrial lipids, including cardiol…	FLJ39120;GSDM;GSDM1	gasdermin A
PPP3CC	-0.93	1	0.18	1	5533	PPP3CC	Calcium-dependent, calmodulin-stimulated protein phosphatase. This subunit may have a role in the calmodulin activation of calcineurin.	CALNA3;PP2Bgamma	protein phosphatase 3 catalytic subunit gamma
C17orf66	-0.93	1	0.29	1	256957	HEATR9	NA	FLJ32830;C17orf66	HEAT repeat containing 9
AHSG	-0.93	1	0.33	1	197	AHSG	Promotes endocytosis, possesses opsonic properties and influences the mineral phase of bone. Shows affinity for calcium and barium ions.	FETUA;A2HS;HSGA	alpha 2-HS glycoprotein
EPHA5	-0.93	1	0.42	1	2044	EPHA5	Receptor tyrosine kinase which binds promiscuously GPI- anchored ephrin-A family ligands residing on adjacent cells, leading to contact-dependent bidirectional signaling into neighboring cells. The signaling pathway downstream of the receptor is referred to as forward signaling while the signaling pathway downstream of the ephrin ligand is referred to as reverse signaling. Among GPI-anchored ephr…	Hek7;TYRO4;CEK7;EHK1	EPH receptor A5
SNX33	-0.93	1	0.44	1	257364	SNX33	Plays a role in the reorganization of the cytoskeleton, endocytosis and cellular vesicle trafficking via its interactions with membranes, WASL, DNM1 and DNM2. Acts both during interphase and at the end of mitotic cell divisions. Required for efficient progress through mitosis and cytokinesis. Required for normal formation of the cleavage furrow at the end of mitosis. Modulates endocytosis of cell…	MGC32065;SH3PXD3C;SNX30;SH3PX3	sorting nexin 33
FGB	-0.93	1	0.58	1	2244	FGB	Cleaved by the protease thrombin to yield monomers which, together with fibrinogen alpha (FGA) and fibrinogen gamma (FGG), polymerize to form an insoluble fibrin matrix. Fibrin has a major function in hemostasis as one of the primary components of blood clots. In addition, functions during the early stages of wound repair to stabilize the lesion and guide cell migration during re-epithelializatio…	NA	fibrinogen beta chain
SPRTN	-0.93	1	0.58	1	83932	SPRTN	Regulator of UV-induced DNA damage response: acts as a 'reader' of ubiquitinated PCNA that enhances RAD18-mediated PCNA ubiquitination and translesion DNA synthesis (TLS). Recruited to sites of UV damage and interacts with ubiquitinated PCNA and RAD18, the E3 ubiquitin ligase that monoubiquitinates PCNA. Facilitates chromatin association of RAD18 and is required for efficient PCNA monoubiquitinat…	DKFZP547N043;Spartan;DVC1;C1orf124	SprT-like N-terminal domain
VPS16	-0.93	1	0.63	1	64601	VPS16	Plays a role in vesicle-mediated protein trafficking to lysosomal compartments including the endocytic membrane transport and autophagic pathways. Believed to act as a core component of the putative HOPS and CORVET endosomal tethering complexes which are proposed to be involved in the Rab5-to-Rab7 endosome conversion probably implicating MON1A/B, and via binding SNAREs and SNARE complexes to medi…	NA	VPS16, CORVET/HOPS core subunit
DNAJC11	-0.93	1	0.71	1	55735	DNAJC11	Isoform 1: Required for mitochondrial inner membrane organization. Seems to function through its association with the MICOS complex and the mitochondrial outer membrane sorting assembly machinery (SAM) complex. {ECO:0000269|PubMed:25111180, ECO:0000305}.	FLJ10737	DnaJ heat shock protein family (Hsp40) member C11
PTGES3L-AARSD1	-0.92	1	-1.5	1	100885850	NA	Functions in trans to edit the amino acid moiety from incorrectly charged tRNA(Ala). {ECO:0000250}.	NA	NA
OR2A7	-0.92	1	-1.06	1	401427	OR2A7	Odorant receptor. {ECO:0000305}.	HSDJ0798C17	olfactory receptor family 2 subfamily A member 7
MDC1	-0.92	1	-0.98	1	9656	MDC1	Required for checkpoint mediated cell cycle arrest in response to DNA damage within both the S phase and G2/M phases of the cell cycle. May serve as a scaffold for the recruitment of DNA repair and signal transduction proteins to discrete foci of DNA damage marked by 'Ser-139' phosphorylation of histone H2AFX. Also required for downstream events subsequent to the recruitment of these proteins. Th…	NFBD1;KIAA0170;Em:AB023051.5	mediator of DNA damage checkpoint 1
PGLYRP1	-0.92	1	-0.93	1	8993	PGLYRP1	Pattern receptor that binds to murein peptidoglycans (PGN) of Gram-positive bacteria. Has bactericidal activity towards Gram-positive bacteria. May kill Gram-positive bacteria by interfering with peptidoglycan biosynthesis. Binds also to Gram- negative bacteria, and has bacteriostatic activity towards Gram- negative bacteria. Plays a role in innate immunity. {ECO:0000269|PubMed:11461926, ECO:0000…	TAG7;PGRP;PGRP-S;PGRPS;TNFSF3L;PGLYRP	peptidoglycan recognition protein 1
JAM2	-0.92	1	-0.91	1	58494	JAM2	May play a role in the processes of lymphocyte homing to secondary lymphoid organs.	VE-JAM;JAM-B;JAMB;CD322;C21orf43	junctional adhesion molecule 2
GNPDA1	-0.92	1	-0.9	1	10007	GNPDA1	Seems to trigger calcium oscillations in mammalian eggs. These oscillations serve as the essential trigger for egg activation and early development of the embryo (By similarity). {ECO:0000250}.	GNPDA;HLN;GPI;KIAA0060;GNPI	glucosamine-6-phosphate deaminase 1
KIAA0100	-0.92	1	-0.79	1	9703	KIAA0100	May be involved in membrane trafficking. {ECO:0000250|UniProtKB:K7VLR4}.	DKFZp686M0843;MGC111488;BCOX1;CT101;BCOX;FMP27	KIAA0100
FAM84A	-0.92	1	-0.62	1	151354	FAM84A	NA	NSE1;FLJ35392	family with sequence similarity 84 member A
KRTAP4-8	-0.92	1	-0.62	1	728224	KRTAP4-8	In the hair cortex, hair keratin intermediate filaments are embedded in an interfilamentous matrix, consisting of hair keratin-associated proteins (KRTAP), which are essential for the formation of a rigid and resistant hair shaft through their extensive disulfide bond cross-linking with abundant cysteine residues of hair keratins. The matrix proteins include the high- sulfur and high-glycine-tyro…	KAP4.8	keratin associated protein 4-8
PGM1	-0.92	1	-0.55	1	5236	PGM1	This enzyme participates in both the breakdown and synthesis of glucose.	NA	phosphoglucomutase 1
DNMT3L	-0.92	1	-0.48	1	29947	DNMT3L	Catalytically inactive regulatory factor of DNA methyltransferases that can either promote or inhibit DNA methylation depending on the context (By similarity). Essential for the function of DNMT3A and DNMT3B: activates DNMT3A and DNMT3B by binding to their catalytic domain (PubMed:17687327). Acts by accelerating the binding of DNA and S-adenosyl-L-methionine (AdoMet) to the methyltransferases and…	MGC1090	DNA methyltransferase 3 like
CCDC136	-0.92	1	-0.47	1	64753	CCDC136	May play a role in acrosome formation in spermatogenesis and in fertilization. {ECO:0000250|UniProtKB:Q3TVA9}.	KIAA1793;NAG6;DKFZP434G156	coiled-coil domain containing 136
RGS20	-0.92	1	-0.45	1	8601	RGS20	Inhibits signal transduction by increasing the GTPase activity of G protein alpha subunits thereby driving them into their inactive GDP-bound form. Binds selectively to G(z)-alpha and G(alpha)-i2 subunits, accelerates their GTPase activity and regulates their signaling activities. The G(z)-alpha activity is inhibited by the phosphorylation and palmitoylation of the G- protein. Negatively regulate…	RGSZ1;ZGAP1	regulator of G protein signaling 20
SLC34A2	-0.92	1	-0.41	1	10568	SLC34A2	May be involved in actively transporting phosphate into cells via Na(+) cotransport. It may be the main phosphate transport protein in the intestinal brush border membrane. May have a role in the synthesis of surfactant in lungs' alveoli.	NAPI-3B	solute carrier family 34 member 2
GAGE12H	-0.92	1	-0.28	1	729442	GAGE12H	NA	OTTHUMG00000024149	G antigen 12H
RWDD3	-0.92	1	-0.23	1	25950	RWDD3	Enhancer of SUMO conjugation. Via its interaction with UBE2I/UBC9, increases SUMO conjugation to proteins by promoting the binding of E1 and E2 enzymes, thioester linkage between SUMO and UBE2I/UBC9 and transfer of SUMO to specific target proteins which include HIF1A, PIAS, NFKBIA, NR3C1 and TOP1. Isoform 1 and isoform 2 positively regulate the NF-kappa-B signaling pathway by enhancing the sumoyl…	DKFZP566K023	RWD domain containing 3
KCNG1	-0.92	1	-0.2	1	3755	KCNG1	Potassium channel subunit that does not form functional channels by itself. Can form functional heterotetrameric channels with KCNB1; modulates the delayed rectifier voltage-gated potassium channel activation and deactivation rates of KCNB1 (PubMed:19074135). {ECO:0000269|PubMed:19074135}.	Kv6.1;kH2;K13;KCNG	potassium voltage-gated channel modifier subfamily G member 1
EIF3H	-0.92	1	-0.19	1	8667	EIF3H	Component of the eukaryotic translation initiation factor 3 (eIF-3) complex, which is required for several steps in the initiation of protein synthesis (PubMed:17581632, PubMed:25849773, PubMed:27462815). The eIF-3 complex associates with the 40S ribosome and facilitates the recruitment of eIF-1, eIF-1A, eIF-2:GTP:methionyl-tRNAi and eIF-5 to form the 43S pre- initiation complex (43S PIC). The eI…	eIF3-gamma;eIF3-p40;eIF3h;EIF3S3	eukaryotic translation initiation factor 3 subunit H
CYFIP1	-0.92	1	-0.14	1	23191	CYFIP1	Component of the CYFIP1-EIF4E-FMR1 complex which binds to the mRNA cap and mediates translational repression. In the CYFIP1-EIF4E-FMR1 complex this subunit is an adapter between EIF4E and FMR1. Promotes the translation repression activity of FMR1 in brain probably by mediating its association with EIF4E and mRNA (By similarity). Regulates formation of membrane ruffles and lamellipodia. Plays a ro…	KIAA0068;P140SRA-1;SHYC	cytoplasmic FMR1 interacting protein 1
ATP8A1	-0.92	1	-0.1	1	10396	ATP8A1	Catalytic component of a P4-ATPase flippase complex which catalyzes the hydrolysis of ATP coupled to the transport of aminophospholipids from the outer to the inner leaflet of various membranes and ensures the maintenance of asymmetric distribution of phospholipids. Phospholipid translocation seems also to be implicated in vesicle formation and in uptake of lipid signaling molecules. In vitro, it…	ATPIA	ATPase phospholipid transporting 8A1
KRT27	-0.92	1	-0.08	1	342574	KRT27	Essential for the proper assembly of type I and type II keratin protein complexes and formation of keratin intermediate filaments in the inner root sheath (irs). {ECO:0000250|UniProtKB:Q9Z320}.	KRT25C	keratin 27
TYRP1	-0.92	1	-0.08	1	7306	TYRP1	Catalyzes the oxidation of 5,6-dihydroxyindole-2- carboxylic acid (DHICA) into indole-5,6-quinone-2-carboxylic acid in the presence of bound Cu(2+) ions (PubMed:28661582). May regulate or influence the type of melanin synthesized (PubMed:22556244, PubMed:16704458). Also to a lower extent, capable of hydroxylating tyrosine and producing melanin (By similarity). {ECO:0000250|UniProtKB:P07147, ECO:0…	GP75;CATB;TRP;b-PROTEIN;OCA3;TYRP;CAS2	tyrosinase related protein 1
CEP152	-0.92	1	-0.05	1	22995	CEP152	Necessary for centrosome duplication; the function seems also to involve CEP63, CDK5RAP2 and WDR62 through a stepwise assembled complex at the centrosome that recruits CDK2 required for centriole duplication (PubMed:26297806). Acts as a molecular scaffold facilitating the interaction of PLK4 and CENPJ, 2 molecules involved in centriole formation (PubMed:21059844, PubMed:20852615). Proposed to sna…	KIAA0912;SCKL5;MCPH9	centrosomal protein 152
CASR	-0.92	1	-0.05	1	846	CASR	G-protein-coupled receptor that senses changes in the extracellular concentration of calcium ions and plays a key role in maintaining calcium homeostasis (PubMed:7759551, PubMed:8702647, PubMed:8636323, PubMed:8878438, PubMed:17555508, PubMed:19789209, PubMed:21566075, PubMed:22114145, PubMed:23966241, PubMed:25292184, PubMed:25104082, PubMed:26386835, PubMed:25766501, PubMed:22789683). Senses fl…	FHH;NSHPT;GPRC2A;HHC;HHC1	calcium sensing receptor
GSK3A	-0.92	1	0.02	1	2931	GSK3A	Constitutively active protein kinase that acts as a negative regulator in the hormonal control of glucose homeostasis, Wnt signaling and regulation of transcription factors and microtubules, by phosphorylating and inactivating glycogen synthase (GYS1 or GYS2), CTNNB1/beta-catenin, APC and AXIN1. Requires primed phosphorylation of the majority of its substrates. Contributes to insulin regulation o…	NA	glycogen synthase kinase 3 alpha
CCDC138	-0.92	1	0.03	1	165055	CCDC138	NA	FLJ32745	coiled-coil domain containing 138
ALX4	-0.92	1	0.07	1	60529	ALX4	Transcription factor involved in skull and limb development. Plays an essential role in craniofacial development, skin and hair follicle development. {ECO:0000269|PubMed:19692347}.	FPP;PFM;KIAA1788;PFM2	ALX homeobox 4
MID1IP1	-0.92	1	0.11	1	58526	MID1IP1	Plays a role in the regulation of lipogenesis in liver. Up-regulates ACACA enzyme activity. Required for efficient lipid biosynthesis, including triacylglycerol, diacylglycerol and phospholipid. Involved in stabilization of microtubules (By similarity). {ECO:0000250}.	STRAIT11499;FLJ10386;MIG12;THRSPL;G12-like	MID1 interacting protein 1
OR9I1	-0.92	1	0.12	1	219954	OR9I1	Odorant receptor. {ECO:0000305}.	NA	olfactory receptor family 9 subfamily I member 1
TPBG	-0.92	1	0.13	1	7162	TPBG	May function as an inhibitor of Wnt/beta-catenin signaling by indirectly interacting with LRP6 and blocking Wnt3a- dependent LRP6 internalization. {ECO:0000269|PubMed:22100263}.	5T4-AG;5T4	trophoblast glycoprotein
POLD3	-0.92	1	0.16	1	10714	POLD3	As a component of the trimeric and tetrameric DNA polymerase delta complexes (Pol-delta3 and Pol-delta4, respectively), plays a role in high fidelity genome replication, including in lagging strand synthesis, and repair. Required for optimal Pol-delta activity. Stabilizes the Pol-delta complex and plays a major role in Pol-delta stimulation by PCNA (PubMed:10219083, PubMed:10852724, PubMed:115957…	P66;KIAA0039;P68;PPP1R128	DNA polymerase delta 3, accessory subunit
SYNPR	-0.92	1	0.16	1	132204	SYNPR	Intrinsic membrane protein of small synaptic vesicles. Probable vesicular channel protein (By similarity). {ECO:0000250}.	MGC26651;SPO	synaptoporin
PROKR2	-0.92	1	0.21	1	128674	PROKR2	Receptor for prokineticin 2. Exclusively coupled to the G(q) subclass of heteromeric G proteins. Activation leads to mobilization of calcium, stimulation of phosphoinositide turnover and activation of p44/p42 mitogen-activated protein kinase.	GPR73b;PKR2;GPRg2;dJ680N4.3;GPR73L1;KAL3	prokineticin receptor 2
TOR1B	-0.92	1	0.24	1	27348	TOR1B	May serve as a molecular chaperone assisting in the proper folding of secreted and/or membrane proteins. Plays a role in non-neural cells nuclear envelope and endoplasmic reticulum integrity. May have a redundant function with TOR1A in non-neural tissues. {ECO:0000269|PubMed:23569223, ECO:0000269|PubMed:24275647}.	DQ1;MGC4386	torsin family 1 member B
ARMC9	-0.92	1	0.32	1	80210	ARMC9	NA	FLJ12584;KIAA1868;ARM;KU-MEL-1	armadillo repeat containing 9
MYOD1	-0.92	1	0.4	1	4654	MYOD1	Acts as a transcriptional activator that promotes transcription of muscle-specific target genes and plays a role in muscle differentiation. Together with MYF5 and MYOG, co-occupies muscle-specific gene promoter core region during myogenesis. Induces fibroblasts to differentiate into myoblasts. Interacts with and is inhibited by the twist protein. This interaction probably involves the basic domai…	PUM;MYOD;bHLHc1;MYF3	myogenic differentiation 1
ZNF813	-0.92	1	0.43	1	126017	ZNF813	May be involved in transcriptional regulation.	FLJ16542	zinc finger protein 813
GALNT5	-0.92	1	0.46	1	11227	GALNT5	Catalyzes the initial reaction in O-linked oligosaccharide biosynthesis, the transfer of an N-acetyl-D- galactosamine residue to a serine or threonine residue on the protein receptor. Has activity toward EA2 peptide substrate, but has a weak activity toward Muc2 or Muc1b substrates (By similarity). {ECO:0000250}.	GalNAc-T5	polypeptide N-acetylgalactosaminyltransferase 5
KIAA1841	-0.92	1	0.6	1	84542	KIAA1841	NA	NA	KIAA1841
PLK5	-0.92	1	0.87	1	126520	PLK5	Inactive serine/threonine-protein kinase that plays a role in cell cycle progression and neuronal differentiation. {ECO:0000269|PubMed:21245385}.	SgK384ps;PLK5P	polo like kinase 5
LRR1	-0.92	1	1.45	1	122769	LRR1	May negatively regulate the 4-1BB-mediated signaling cascades which result in the activation of NK-kappaB and JNK1. Probable substrate recognition subunit of an ECS (Elongin BC- CUL2/5-SOCS-box protein) E3 ubiquitin-protein ligase complex which mediates the ubiquitination and subsequent proteasomal degradation of target proteins. {ECO:0000269|PubMed:15601820}.	MGC20689;LRR-1;PPIL5	leucine rich repeat protein 1
SNF8	-0.91	1	-1.13	1	11267	SNF8	Component of the endosomal sorting complex required for transport II (ESCRT-II), which is required for multivesicular body (MVB) formation and sorting of endosomal cargo proteins into MVBs. The MVB pathway mediates delivery of transmembrane proteins into the lumen of the lysosome for degradation. The ESCRT-II complex is probably involved in the recruitment of the ESCRT-III complex. The ESCRT-II c…	EAP30;VPS22;Dot3	SNF8, ESCRT-II complex subunit
SH3BGRL2	-0.91	1	-1.11	1	83699	SH3BGRL2	NA	NA	SH3 domain binding glutamate rich protein like 2
TAS2R46	-0.91	1	-1.1	1	259292	TAS2R46	Receptor that may play a role in the perception of bitterness and is gustducin-linked. May play a role in sensing the chemical composition of the gastrointestinal content. The activity of this receptor may stimulate alpha gustducin, mediate PLC-beta-2 activation and lead to the gating of TRPM5 (By similarity). In airway epithelial cells, binding of bitter compounds increases the intracellular cal…	T2R54	taste 2 receptor member 46
PEX26	-0.91	1	-1.02	1	55670	PEX26	Probably required for protein import into peroxisomes. Anchors PEX1 and PEX6 to peroxisome membranes, possibly to form heteromeric AAA ATPase complexes required for the import of proteins into peroxisomes. Involved in the import of catalase and proteins containing a PTS2 target sequence, but not in import of proteins with a PTS1 target sequence. {ECO:0000269|PubMed:12717447, ECO:0000269|PubMed:12…	FLJ20695	peroxisomal biogenesis factor 26
MAP7D3	-0.91	1	-1.01	1	79649	MAP7D3	Promotes the assembly and stability of microtubules. {ECO:0000269|PubMed:22142902, ECO:0000269|PubMed:24927501}.	FLJ12649	MAP7 domain containing 3
LYPD1	-0.91	1	-0.86	1	116372	LYPD1	Believed to act as a modulator of nicotinic acetylcholine receptors (nAChRs) activity. In vitro increases receptor desensitization and decreases affinity for ACh of alpha- 4:beta-2-containing nAChRs. May play a role in the intracellular trafficking of alpha-4:beta-2 and alpha-7-containing nAChRs and may inhibit their expression at the cell surface. May be involved in the control of anxiety. {ECO:…	MGC29643;LYPDC1	LY6/PLAUR domain containing 1
TAS2R8	-0.91	1	-0.86	1	50836	TAS2R8	Receptor that may play a role in the perception of bitterness and is gustducin-linked. May play a role in sensing the chemical composition of the gastrointestinal content. The activity of this receptor may stimulate alpha gustducin, mediate PLC-beta-2 activation and lead to the gating of TRPM5.	T2R8;TRB5	taste 2 receptor member 8
OR10C1	-0.91	1	-0.86	1	442194	OR10C1	Odorant receptor. {ECO:0000305}.	hs6M1-17;OR10C1P;OR10C2	olfactory receptor family 10 subfamily C member 1 (gene/pseudogene)
SMAD5	-0.91	1	-0.83	1	4090	SMAD5	Transcriptional modulator activated by BMP (bone morphogenetic proteins) type 1 receptor kinase. SMAD5 is a receptor-regulated SMAD (R-SMAD).	Dwfc;JV5-1;MADH5	SMAD family member 5
FAM98C	-0.91	1	-0.81	1	147965	FAM98C	NA	FLJ44669	family with sequence similarity 98 member C
HRC	-0.91	1	-0.72	1	3270	HRC	May play a role in the regulation of calcium sequestration or release in the SR of skeletal and cardiac muscle.	MGC133236	histidine rich calcium binding protein
ZBTB10	-0.91	1	-0.72	1	65986	ZBTB10	May be involved in transcriptional regulation.	RINZF;FLJ12752	zinc finger and BTB domain containing 10
CLEC17A	-0.91	1	-0.72	1	388512	CLEC17A	Cell surface receptor which may be involved in carbohydrate-mediated communication between cells in the germinal center. Binds glycans with terminal alpha-linked mannose or fucose residues. {ECO:0000269|PubMed:19419970}.	FLJ45910	C-type lectin domain containing 17A
LYPD3	-0.91	1	-0.65	1	27076	LYPD3	Supports cell migration. May be involved in urothelial cell-matrix interactions. May be involved in tumor progression. {ECO:0000269|PubMed:11179665, ECO:0000269|PubMed:11245483, ECO:0000269|PubMed:12592373, ECO:0000269|PubMed:15012588}.	C4.4A	LY6/PLAUR domain containing 3
CLNS1A	-0.91	1	-0.64	1	1207	CLNS1A	Chaperone that regulates the assembly of spliceosomal U1, U2, U4 and U5 small nuclear ribonucleoproteins (snRNPs), the building blocks of the spliceosome. Thereby, plays an important role in the splicing of cellular pre-mRNAs. Most spliceosomal snRNPs contain a common set of Sm proteins SNRPB, SNRPD1, SNRPD2, SNRPD3, SNRPE, SNRPF and SNRPG that assemble in a heptameric protein ring on the Sm site…	ICln;CLCI	chloride nucleotide-sensitive channel 1A
SLC35G6	-0.91	1	-0.59	1	643664	SLC35G6	NA	TMEM21B;AMAC1L3	solute carrier family 35 member G6
SLC35E2	-0.91	1	-0.55	1	9906	SLC35E2A	Putative transporter. {ECO:0000250}.	KIAA0447;SLC35E2	solute carrier family 35 member E2A
TTC23	-0.91	1	-0.53	1	64927	TTC23	NA	FLJ12572;HCC-8	tetratricopeptide repeat domain 23
C8orf44	-0.91	1	-0.52	1	56260	C8orf44	NA	FLJ11267	chromosome 8 open reading frame 44
[truncated: 17,737 more rows]
